# Supplementary material
Source: publisher figshare collection journal article supplement (https://gsajournals.figshare.com/ndownloader/files/18714662)
Supplement: Supplementary file 1 [file 18714662]

## Sheet: Sheet1
Code	Gene_id	ck_group_fpkm	90128_24_group_fpkm	90128_72_group_fpkm	CN152_24_group_fpkm	CN152_72_group_fpkm	CN152_24_readcount(CN152_24vsck)	ck_readcount(CN152_24vsck)	log2FoldChange(CN152_24vsck)	pval(CN152_24vsck)	padj(CN152_24vsck)	significant(CN152_24vsck)	CN_72_readcount(CN_72vsCN_24)	CN_24_readcount(CN_72vsCN_24)	log2FoldChange(CN_72vsCN_24)	pval(CN_72vsCN_24)	padj(CN_72vsCN_24)	significant(CN_72vsCN_24)	CN_72_readcount(CN_72vsck)	ck_readcount(CN_72vsck)	log2FoldChange(CN152_72vsck)	pval(CN152_72vsck)	padj(CN152_72vsck)	significant(CN152_72vsck)	90128_24_readcount(90128_24vsck)	ck_readcount(90128_24vsck)	log2FoldChange(90128_24vsck)	pval(90128_24vsck)	padj(90128_24vsck)	significant(90128_24vsck)	J_72_readcount(J_72vsJ_24)	J_24_readcount(J_72vsJ_24)	log2FoldChange(J_72vsJ_24)	pval(J_72vsJ_24)	padj(J_72vsJ_24)	significant(J_72vsJ_24)	90128_72_readcount(90128_72vsck)	ck_readcount(90128_72vsck)	log2FoldChange(90128_72vsck)	pval(90128_72vsck)	padj(90128_72vsck)	significant(90128_72vsck)	biological_process	biological_process_description	cellular_component	cellular_component_description	molecular_function	molecular_function_description	KEGG AnnotInfo
1	Novel00558	4.23015	0.94999	1.87847	1.12871	1.21957	176.592	694.86	-1.9763	8.0762e-07	1.5537e-05	DOWN	176.88	171.197	0.047116	1	1	FALSE	186.483	733.487	-1.9757	9.2776e-07	2.9677e-05	DOWN	144.546	733.749	-2.3438	2.9119e-08	3.6384e-07	DOWN	264.254	133.689	0.98304	0.0037707	0.022157	FALSE	274.014	678.387	-1.3079	0.0001275	0.0022286	DOWN	GO:0006351//GO:0034645//GO:0097659//GO:0071704//GO:0051707//GO:0006725//GO:2001141//GO:0044260//GO:1901576//GO:0000090//GO:0000087//GO:0051252//GO:0043207//GO:0008152//GO:0098586//GO:1903506//GO:1903047//GO:0007059//GO:0007017//GO:0051171//GO:0009987//GO:0080090//GO:1901362//GO:0009607//GO:0000278//GO:0009271//GO:0048285//GO:0000280//GO:0019438//GO:0031110//GO:0098763//GO:0009889//GO:0031323//GO:…	transcription, DNA-templated//cellular macromolecule biosynthetic process//nucleic acid-templated transcription//organic substance metabolic process//response to other organism//cellular aromatic compound metabolic process//regulation of RNA biosynthetic process//cellular macromolecule metabolic process//organic substance biosynthetic process//mitotic anaphase//mitotic M phase//regulation of RNA …	GO:0032991//GO:0015630//GO:0005575//GO:0005876//GO:0000776//GO:0000779//GO:0000793//GO:0043226//GO:0000775//GO:0098687//GO:0044430//GO:0000940//GO:0005856//GO:0005694//GO:0000777//GO:0044422//GO:0043229//GO:0044446//GO:0044424//GO:0005874//GO:0043232//GO:0044464//GO:0005622//GO:0005819//GO:0005623//GO:0044427//GO:0043228	protein-containing complex//microtubule cytoskeleton//cellular_component//spindle microtubule//kinetochore//condensed chromosome, centromeric region//condensed chromosome//organelle//chromosome, centromeric region//chromosomal region//cytoskeletal part//condensed chromosome outer kinetochore//cytoskeleton//chromosome//condensed chromosome kinetochore//organelle part//intracellular organelle//intr…	GO:0015631//GO:0003674//GO:0008092//GO:0005488//GO:0008017//GO:0044877//GO:0005515	tubulin binding//molecular_function//cytoskeletal protein binding//binding//microtubule binding//protein-containing complex binding//protein binding	--
2	Novel00885	0.00541919	3.95822	15.4594	2.46958	20.2847	144.109	0.339252	8.7306	0.00084732	0.0064703	UP	1015.73	139.011	2.8693	0.064995	0.2606	FALSE	1077.19	0.361769	11.54	2.532e-05	0.00049208	UP	215.315	0.361026	9.2201	3.2021e-05	0.00019846	UP	779.54	200.318	1.9603	1.5334e-07	4.2522e-06	UP	809.001	0.334037	11.242	3.6816e-70	1.0977e-65	UP	GO:0050896//GO:0006950//GO:0008150//GO:0006979//GO:0055114//GO:0008152	response to stimulus//response to stress//biological_process//response to oxidative stress//oxidation-reduction process//metabolic process	--	--	GO:0020037//GO:0005515//GO:0016209//GO:0005488//GO:0016491//GO:0016684//GO:0003824//GO:1901363//GO:0097159//GO:0004601//GO:0046906//GO:0003674	heme binding//protein binding//antioxidant activity//binding//oxidoreductase activity//oxidoreductase activity, acting on peroxide as acceptor//catalytic activity//heterocyclic compound binding//organic cyclic compound binding//peroxidase activity//tetrapyrrole binding//molecular_function	K00430 peroxidase [EC:1.11.1.7] | (RefSeq) cationic peroxidase 1-like
3	Novel01739	6.49532	34.698	45.5883	99.367	31.3011	4641.03	313.462	3.8881	0.0011684	0.0084416	UP	1301.51	4482.15	-1.784	0.052456	0.22645	FALSE	1374.95	331.779	2.0511	1.7739e-11	1.8616e-09	UP	1522.12	331.37	2.1996	0.012374	0.035431	UP	1881.61	1412.47	0.41375	0.56716	0.82057	FALSE	1948.81	307.028	2.6662	0.0004693	0.0063547	UP	GO:0008152//GO:0044260//GO:0006725//GO:0071704//GO:0008150//GO:0033554//GO:0009987//GO:0006281//GO:0006139//GO:1901360//GO:0006950//GO:0006974//GO:0051716//GO:0044237//GO:0043170//GO:0006259//GO:0034641//GO:0050896//GO:0006807//GO:0006310//GO:0090304//GO:0044238//GO:0046483	metabolic process//cellular macromolecule metabolic process//cellular aromatic compound metabolic process//organic substance metabolic process//biological_process//cellular response to stress//cellular process//DNA repair//nucleobase-containing compound metabolic process//organic cyclic compound metabolic process//response to stress//cellular response to DNA damage stimulus//cellular response to …	--	--	GO:0016787//GO:0032550//GO:0035639//GO:0032555//GO:0032553//GO:0005524//GO:0003674//GO:0016818//GO:0036094//GO:0043167//GO:0009378//GO:0019001//GO:0003724//GO:0003824//GO:0030554//GO:0003676//GO:1901363//GO:0097159//GO:0016462//GO:0004386//GO:0016817//GO:0032549//GO:0032559//GO:0005488//GO:0043168//GO:0017076//GO:1901265//GO:0097367//GO:0001882//GO:0005525//GO:0001883//GO:0016887//GO:0000166//GO:…	hydrolase activity//purine ribonucleoside binding//purine ribonucleoside triphosphate binding//purine ribonucleotide binding//ribonucleotide binding//ATP binding//molecular_function//hydrolase activity, acting on acid anhydrides, in phosphorus-containing anhydrides//small molecule binding//ion binding//four-way junction helicase activity//guanyl nucleotide binding//RNA helicase activity//catalyti…	K08900 mitochondrial chaperone BCS1 | (RefSeq) protein HYPER-SENSITIVITY-RELATED 4-like
4	Novel02056	6.02313	1.5565	2.61743	2.10894	3.3179	108.351	320.416	-1.5642	5.3127e-05	0.00062438	DOWN	157.31	104.997	0.58326	0.22776	0.56213	FALSE	165.685	337.415	-1.0261	0.0028622	0.022235	DOWN	77.4943	337.365	-2.1222	1.5371e-10	3.0301e-09	DOWN	120.525	71.7259	0.74877	0.081585	0.23273	FALSE	124.962	312.548	-1.3226	0.00037221	0.005269	DOWN	GO:0012501//GO:0008150//GO:0009987//GO:0016265//GO:0006915//GO:0033554//GO:0051716//GO:0006950//GO:0006974//GO:0008219//GO:0050896	programmed cell death//biological_process//cellular process//obsolete death//apoptotic process//cellular response to stress//cellular response to stimulus//response to stress//cellular response to DNA damage stimulus//cell death//response to stimulus	--	--	--	--	--
5	Novel02168	45.6564	8.63128	24.9323	18.5603	20.2906	1729.52	4406.86	-1.3494	9.563e-06	0.00013947	DOWN	1733.02	1675.66	0.048565	0.91284	1	FALSE	1829.29	4644.29	-1.3442	3.6215e-08	1.7903e-06	DOWN	776.594	4646.54	-2.5809	6.1195e-26	9.2691e-24	DOWN	2069.95	718.938	1.5257	1.8066e-10	1.0738e-08	UP	2146.88	4297.74	-1.0013	0.0001764	0.0028996	DOWN	GO:0050896//GO:0006952//GO:0006950//GO:0008150	response to stimulus//defense response//response to stress//biological_process	--	--	--	--	K03142 transcription initiation factor TFIIH subunit 2 | (RefSeq) general transcription factor IIH subunit 2-like
6	Novel02198	0.93976	3.619	3.71491	7.50951	5.13196	523.755	64.9668	3.0111	0.0008029	0.0061834	UP	319.607	505.925	-0.66262	0.25154	0.59409	FALSE	337.476	68.1417	2.3082	5.5285e-09	3.3203e-07	UP	238.356	68.0985	1.8074	0.0078504	0.024066	UP	226.64	220.829	0.037472	0.90879	1	FALSE	234.955	63.2575	1.8931	9.0931e-06	0.00024316	UP	GO:0048856//GO:0044237//GO:0006464//GO:0016310//GO:0043170//GO:0050896//GO:0044267//GO:0019538//GO:0006955//GO:0071840//GO:0016043//GO:0036211//GO:0006468//GO:0044238//GO:0006793//GO:0048869//GO:0008152//GO:0044260//GO:0071704//GO:0032989//GO:0008150//GO:0009653//GO:0043412//GO:0006796//GO:0032502//GO:0000902//GO:0002376//GO:0009987	anatomical structure development//cellular metabolic process//cellular protein modification process//phosphorylation//macromolecule metabolic process//response to stimulus//cellular protein metabolic process//protein metabolic process//immune response//cellular component organization or biogenesis//cellular component organization//protein modification process//protein phosphorylation//primary met…	GO:0005575//GO:0016020	cellular_component//membrane	GO:0032549//GO:0032559//GO:0005488//GO:0043168//GO:0017076//GO:1901265//GO:0097367//GO:0016772//GO:0001882//GO:0004672//GO:0001883//GO:0000166//GO:0016773//GO:0032550//GO:0032555//GO:0035639//GO:0005524//GO:0032553//GO:0016301//GO:0036094//GO:0003674//GO:0043167//GO:0016740//GO:0003824//GO:0030554//GO:1901363//GO:0097159	ribonucleoside binding//adenyl ribonucleotide binding//binding//anion binding//purine nucleotide binding//nucleoside phosphate binding//carbohydrate derivative binding//transferase activity, transferring phosphorus-containing groups//nucleoside binding//protein kinase activity//purine nucleoside binding//nucleotide binding//phosphotransferase activity, alcohol group as acceptor//purine ribonucleo…	no KO assigned | (RefSeq) probable LRR receptor-like serine/threonine-protein kinase At4g08850
7	Novel02548	27.448	6.42382	13.1033	4.62843	7.56336	534.903	3248.01	-2.6022	4.1875e-16	3.7226e-14	DOWN	790.564	517.306	0.61186	0.056488	0.23829	FALSE	834.649	3423.54	-2.0362	1.9788e-15	4.3517e-13	DOWN	706.138	3424.77	-2.278	2.1077e-20	1.8243e-18	DOWN	1324.08	654.76	1.016	0.00024341	0.0023899	UP	1374.57	3168.29	-1.2047	1.2022e-05	0.0003077	DOWN	GO:0009617//GO:0008150//GO:0009607//GO:0055114//GO:0008152//GO:0043207//GO:0042742//GO:0006508//GO:0051707//GO:0071704//GO:0006952//GO:0050896//GO:0098542//GO:0044238//GO:0019538//GO:0006950//GO:0009605//GO:0043170//GO:0051704	response to bacterium//biological_process//response to biotic stimulus//oxidation-reduction process//metabolic process//response to external biotic stimulus//defense response to bacterium//proteolysis//response to other organism//organic substance metabolic process//defense response//response to stimulus//defense response to other organism//primary metabolic process//protein metabolic process//re…	GO:0042597//GO:0031975//GO:0030288//GO:0071944//GO:0005575//GO:0005623//GO:0044464//GO:0044462//GO:0030312//GO:0030313	periplasmic space//envelope//outer membrane-bounded periplasmic space//cell periphery//cellular_component//cell//cell part//external encapsulating structure part//external encapsulating structure//cell envelope	GO:0016651//GO:0016684//GO:0003824//GO:0016491//GO:0017171//GO:0070011//GO:0004252//GO:0004601//GO:0005509//GO:0004175//GO:0016787//GO:0008236//GO:0043167//GO:0003674//GO:0043169//GO:0050664//GO:0016209//GO:0005488//GO:0046872//GO:0008233	oxidoreductase activity, acting on NAD(P)H//oxidoreductase activity, acting on peroxide as acceptor//catalytic activity//oxidoreductase activity//serine hydrolase activity//peptidase activity, acting on L-amino acid peptides//serine-type endopeptidase activity//peroxidase activity//calcium ion binding//endopeptidase activity//hydrolase activity//serine-type peptidase activity//ion binding//molecu…	K13447 respiratory burst oxidase [EC:1.6.3.- 1.11.1.-] | (RefSeq) respiratory burst oxidase homolog protein E-like
8	Novel02614	0.634103	11.8258	3.51014	12.2856	2.49894	777.585	41.5817	4.225	3.9048e-08	9.9174e-07	UP	140.117	752.018	-2.4241	0.00016562	0.0024247	DOWN	147.971	43.9483	1.7514	0.0008346	0.008456	UP	713.224	43.9141	4.0216	7.146e-16	3.4218e-14	UP	193.439	659.479	-1.7694	3.2079e-06	6.124e-05	DOWN	200.854	40.6746	2.3039	2.24e-07	9.7791e-06	UP	GO:0007186//GO:0051716//GO:0007154//GO:0065007//GO:0006629//GO:0050794//GO:0050896//GO:0044238//GO:0007165//GO:0008152//GO:0071704//GO:0050789//GO:0008150//GO:0023052//GO:0055114//GO:0009987	G-protein coupled receptor signaling pathway//cellular response to stimulus//cell communication//biological regulation//lipid metabolic process//regulation of cellular process//response to stimulus//primary metabolic process//signal transduction//metabolic process//organic substance metabolic process//regulation of biological process//biological_process//signaling//oxidation-reduction process//ce…	GO:0044425//GO:0016021//GO:0031224//GO:0005575//GO:0016020	membrane part//integral component of membrane//intrinsic component of membrane//cellular_component//membrane	GO:0004871//GO:0004888//GO:0016705//GO:0060089//GO:0016503//GO:0001653//GO:0016717//GO:0003674//GO:0008528//GO:0038023//GO:0016491//GO:0004932//GO:0004930//GO:0003824	obsolete signal transducer activity//transmembrane signaling receptor activity//oxidoreductase activity, acting on paired donors, with incorporation or reduction of molecular oxygen//molecular transducer activity//pheromone receptor activity//peptide receptor activity//oxidoreductase activity, acting on paired donors, with oxidation of a pair of donors resulting in the reduction of molecular oxyg…	K10257 acyl-lipid omega-3 desaturase [EC:1.14.19.25 1.14.19.35 1.14.19.36] | (RefSeq) omega-3 fatty acid desaturase, endoplasmic reticulum-like
9	Novel02670	1.0822	0.0828639	0.149513	0.125703	0.148024	17.0419	153.448	-3.1706	2.4175e-09	7.6837e-08	DOWN	18.5393	16.5178	0.16657	0.92066	1	FALSE	19.5815	161.776	-3.0464	2.2883e-08	1.1841e-06	DOWN	10.9319	161.704	-3.8867	1.736e-15	7.7618e-14	DOWN	18.4603	10.1309	0.86565	0.42247	0.69243	FALSE	19.1198	149.829	-2.9702	3.6093e-08	1.9217e-06	DOWN	GO:0009987//GO:0006796//GO:0043412//GO:0023052//GO:0008150//GO:0050789//GO:0071704//GO:0044260//GO:0008152//GO:0006793//GO:0007165//GO:0018106//GO:0036211//GO:0044238//GO:0006468//GO:0035556//GO:0019538//GO:0018202//GO:0050794//GO:0044267//GO:0050896//GO:0065007//GO:0000160//GO:0016310//GO:0043170//GO:0007154//GO:0006464//GO:0018193//GO:0044237//GO:0051716	cellular process//phosphate-containing compound metabolic process//macromolecule modification//signaling//biological_process//regulation of biological process//organic substance metabolic process//cellular macromolecule metabolic process//metabolic process//phosphorus metabolic process//signal transduction//peptidyl-histidine phosphorylation//protein modification process//primary metabolic proces…	GO:0016020//GO:0005575	membrane//cellular_component	GO:0097159//GO:0004673//GO:0030554//GO:0003824//GO:0005024//GO:1901363//GO:0016740//GO:0004675//GO:0043167//GO:0038023//GO:0036094//GO:0003674//GO:0005524//GO:0032553//GO:0016301//GO:0032550//GO:0032555//GO:0035639//GO:0043169//GO:0060089//GO:0004674//GO:0016773//GO:0001883//GO:0016775//GO:0000166//GO:0005026//GO:0016772//GO:0001882//GO:0004672//GO:1901265//GO:0004888//GO:0046872//GO:0097367//GO:…	organic cyclic compound binding//protein histidine kinase activity//adenyl nucleotide binding//catalytic activity//transforming growth factor beta-activated receptor activity//heterocyclic compound binding//transferase activity//transmembrane receptor protein serine/threonine kinase activity//ion binding//signaling receptor activity//small molecule binding//molecular_function//ATP binding//ribonu…	--
10	PGSC0003DMG400000523	7.59054	2.46682	3.93027	1.70192	3.39898	154.004	710.766	-2.2064	4.0108e-10	1.4674e-08	DOWN	281.213	149.335	0.91311	0.021046	0.1176	FALSE	296.819	747.813	-1.3331	8.0176e-06	0.00018866	DOWN	217.376	747.608	-1.7821	7.3524e-11	1.535e-09	DOWN	317.485	200.967	0.65973	0.028589	0.10778	FALSE	329.493	693.051	-1.0727	0.0006226	0.0080156	DOWN	GO:0048856//GO:0048869//GO:0048868//GO:0009932//GO:0006950//GO:0080134//GO:0048588//GO:0016049//GO:0051704//GO:0000904//GO:0060560//GO:0048583//GO:0032501//GO:0022414//GO:0044703//GO:0044706//GO:0048589//GO:0065007//GO:0008150//GO:0032989//GO:0050789//GO:0009653//GO:0009860//GO:0006952//GO:0050896//GO:0009856//GO:0048468//GO:0003006//GO:0030154//GO:0071840//GO:0032502//GO:0040007//GO:0016043//GO:…	anatomical structure development//cellular developmental process//pollen tube development//cell tip growth//response to stress//regulation of response to stress//developmental cell growth//cell growth//multi-organism process//cell morphogenesis involved in differentiation//developmental growth involved in morphogenesis//regulation of response to stimulus//multicellular organismal process//reprodu…	GO:0071944//GO:0005575//GO:0005886//GO:0016020//GO:0005623//GO:0044464	cell periphery//cellular_component//plasma membrane//membrane//cell//cell part	--	--	no KO assigned | (RefSeq) tetratricopeptide repeat protein 28-like
11	PGSC0003DMG400001274	0.330182	2.34399	8.82375	2.88545	4.47763	142.011	16.5259	3.1032	0.0086932	0.042483	UP	193.86	137.084	0.49995	0.40249	0.75808	FALSE	205.226	17.4313	3.5575	3.4505e-06	9.1409e-05	UP	108.742	17.4291	2.6413	1.1979e-05	8.2209e-05	UP	389.258	100.788	1.9494	0.12502	0.31514	FALSE	402.744	16.1352	4.6416	0.0057419	0.043899	UP	GO:0008150//GO:0042221//GO:0050896//GO:0009719//GO:0009733//GO:0010033//GO:0009725	biological_process//response to chemical//response to stimulus//response to endogenous stimulus//response to auxin//response to organic substance//response to hormone	--	--	--	--	--
12	PGSC0003DMG400001615	5.11507	0.275685	1.97452	0.489173	1.46934	13.4354	146.734	-3.4491	3.7388e-10	1.3714e-08	DOWN	37.5332	13.0376	1.5255	0.092491	0.32906	FALSE	39.5765	154.382	-1.9638	7.8714e-05	0.0012691	DOWN	7.45246	154.352	-4.3724	3.534e-17	1.9984e-15	DOWN	48.3146	6.88555	2.8108	0.00069587	0.0057153	UP	50.179	143.066	-1.5115	0.0025867	0.024125	DOWN	GO:0010033//GO:0009725//GO:0009719//GO:0009733//GO:0008150//GO:0042221//GO:0050896	response to organic substance//response to hormone//response to endogenous stimulus//response to auxin//biological_process//response to chemical//response to stimulus	--	--	--	--	K14488 SAUR family protein | (RefSeq) auxin-induced protein 15A-like
13	PGSC0003DMG400001647	1.54532	0.277593	0.559312	0.365285	0.468447	30.0022	129.581	-2.1107	3.1226e-05	0.00039122	DOWN	34.6908	29.0361	0.25671	0.73829	0.98473	FALSE	36.699	136.263	-1.8926	0.00032422	0.0039628	DOWN	21.7114	136.218	-2.6494	1.7961e-08	2.348e-07	DOWN	40.112	20.1925	0.99021	0.19814	0.4284	FALSE	41.6474	126.319	-1.6008	0.0025112	0.02362	DOWN	GO:0009733//GO:0009719//GO:0009725//GO:0010033//GO:0050896//GO:0042221//GO:0008150	response to auxin//response to endogenous stimulus//response to hormone//response to organic substance//response to stimulus//response to chemical//biological_process	--	--	--	--	K14488 SAUR family protein | (RefSeq) auxin-induced protein 15A-like
14	PGSC0003DMG400001913	3.46326	53.0976	22.286	20.581	32.948	1087.35	185.661	2.5501	9.1695e-14	6.0549e-12	UP	1580.03	1051.94	0.5869	0.055194	0.23468	FALSE	1667.42	195.169	3.0948	3.0796e-26	3.0703e-23	UP	2682.18	195.009	3.7818	5.6124e-45	3.0856e-42	UP	1056.76	2482.97	-1.2324	1.6494e-06	3.4464e-05	DOWN	1094.83	181.047	2.5963	0.001111	0.012596	UP	GO:0031537//GO:0009733//GO:0009719//GO:1903506//GO:0097305//GO:0009813//GO:0006139//GO:1901360//GO:0044271//GO:0051252//GO:0006950//GO:0009651//GO:0008152//GO:0042440//GO:0044237//GO:0009812//GO:0046686//GO:0046283//GO:0019219//GO:0009059//GO:1901576//GO:0044260//GO:2001141//GO:0019222//GO:0006725//GO:0009725//GO:0071704//GO:0097659//GO:0043170//GO:0034645//GO:0006351//GO:0009962//GO:0014070//GO:…	regulation of anthocyanin metabolic process//response to auxin//response to endogenous stimulus//regulation of nucleic acid-templated transcription//response to alcohol//flavonoid biosynthetic process//nucleobase-containing compound metabolic process//organic cyclic compound metabolic process//cellular nitrogen compound biosynthetic process//regulation of RNA metabolic process//response to stress…	GO:0044424//GO:0005575//GO:0043231//GO:0043229//GO:0043227//GO:0005623//GO:0005622//GO:0005634//GO:0044464//GO:0043226	intracellular part//cellular_component//intracellular membrane-bounded organelle//intracellular organelle//membrane-bounded organelle//cell//intracellular//nucleus//cell part//organelle	GO:0005488//GO:0003674//GO:0003700//GO:0003682//GO:0003677//GO:0003676//GO:1901363//GO:0097159//GO:0044877	binding//molecular_function//DNA-binding transcription factor activity//chromatin binding//DNA binding//nucleic acid binding//heterocyclic compound binding//organic cyclic compound binding//protein-containing complex binding	no KO assigned | (RefSeq) transcription factor MYB1R1
15	PGSC0003DMG400003084	1.01502	6.5715	12.028	30.2588	12.3702	1595.51	56.8362	4.8111	1.3137e-11	6.1805e-10	UP	596.274	1545.69	-1.3742	0.0028291	0.025643	DOWN	629.777	60.1637	3.3879	4.4279e-22	2.5968e-19	UP	334.704	60.101	2.4774	1.2946e-13	4.2942e-12	UP	576.94	310.148	0.89546	0.16719	0.38341	FALSE	597.437	55.6618	3.424	0.00020698	0.0032985	UP	GO:0007165//GO:0009987//GO:0035556//GO:0050896//GO:0023052//GO:0050794//GO:0008150//GO:0065007//GO:0000160//GO:0050789//GO:0007154//GO:0051716	signal transduction//cellular process//intracellular signal transduction//response to stimulus//signaling//regulation of cellular process//biological_process//biological regulation//phosphorelay signal transduction system//regulation of biological process//cell communication//cellular response to stimulus	GO:0044464//GO:0005622//GO:0005623//GO:0005575	cell part//intracellular//cell//cellular_component	--	--	no KO assigned | (RefSeq) two-component response regulator ORR10-like
16	PGSC0003DMG400004071	1.13986	3.63659	3.81718	2.63186	3.80784	365.432	166.102	1.1375	0.001302	0.009208	UP	486.046	353.97	0.45747	0.20239	0.52686	FALSE	513.19	175.56	1.5475	2.6793e-05	0.00051237	UP	486.36	175.625	1.4695	2.6593e-07	2.6964e-06	UP	470.007	450.654	0.060663	0.77053	0.95497	FALSE	487.643	162.283	1.5873	1.5405e-06	5.1306e-05	UP	GO:0050896//GO:0006259//GO:0008150//GO:0034641//GO:0090304//GO:0006281//GO:0009987//GO:0046483//GO:0044238//GO:0033554//GO:0006807//GO:0006298//GO:0006974//GO:0008152//GO:0006950//GO:0051716//GO:0044237//GO:1901360//GO:0006139//GO:0006725//GO:0043170//GO:0071704//GO:0044260	response to stimulus//DNA metabolic process//biological_process//cellular nitrogen compound metabolic process//nucleic acid metabolic process//DNA repair//cellular process//heterocycle metabolic process//primary metabolic process//cellular response to stress//nitrogen compound metabolic process//mismatch repair//cellular response to DNA damage stimulus//metabolic process//response to stress//cell…	GO:0005623//GO:0044464//GO:0032300//GO:0005622//GO:1990391//GO:0044424//GO:0032991//GO:0005575	cell//cell part//mismatch repair complex//intracellular//DNA repair complex//intracellular part//protein-containing complex//cellular_component	GO:0001883//GO:0030554//GO:1901363//GO:0003676//GO:0000166//GO:0003677//GO:0001882//GO:0003690//GO:0097159//GO:0043168//GO:0005524//GO:0032553//GO:0032550//GO:0032549//GO:0032559//GO:0032555//GO:0005488//GO:0030983//GO:0035639//GO:0043167//GO:1901265//GO:0097367//GO:0036094//GO:0003674//GO:0017076	purine nucleoside binding//adenyl nucleotide binding//heterocyclic compound binding//nucleic acid binding//nucleotide binding//DNA binding//nucleoside binding//double-stranded DNA binding//organic cyclic compound binding//anion binding//ATP binding//ribonucleotide binding//purine ribonucleoside binding//ribonucleoside binding//adenyl ribonucleotide binding//purine ribonucleotide binding//binding/…	K08735 DNA mismatch repair protein MSH2 | (RefSeq) DNA mismatch repair protein MSH2
17	PGSC0003DMG400004547	0.697862	1460.35	77.9959	236.934	147.368	7172.65	22.6518	8.3067	0.00068202	0.0053933	UP	4035.32	6977.11	-0.78995	0.56055	0.88907	FALSE	4274.79	23.8947	7.483	0.00047094	0.0053495	UP	44124.4	23.8355	10.854	1.6899e-05	0.00011154	UP	2153.75	40672.5	-4.2391	0.01917	0.079202	FALSE	2240.91	22.1724	6.6592	0.0003931	0.0054849	UP	GO:0010466//GO:0008152//GO:0050790//GO:0006950//GO:0051336//GO:0043207//GO:0050832//GO:0044237//GO:0009620//GO:0006508//GO:0009605//GO:0042742//GO:0009892//GO:0019222//GO:0010605//GO:0010951//GO:0043170//GO:0030162//GO:0051707//GO:0071704//GO:0044092//GO:0032268//GO:0065008//GO:0051704//GO:0044260//GO:0051248//GO:0060255//GO:0052548//GO:0051246//GO:0050794//GO:0009617//GO:0032269//GO:0044267//GO:…	negative regulation of peptidase activity//metabolic process//regulation of catalytic activity//response to stress//regulation of hydrolase activity//response to external biotic stimulus//defense response to fungus//cellular metabolic process//response to fungus//proteolysis//response to external stimulus//defense response to bacterium//negative regulation of metabolic process//regulation of meta…	GO:0044425//GO:0016020//GO:0005575//GO:0016021//GO:0031224//GO:0005576	membrane part//membrane//cellular_component//integral component of membrane//intrinsic component of membrane//extracellular region	GO:0030414//GO:0030234//GO:0098772//GO:0004866//GO:0004857//GO:0061134//GO:0003674//GO:0004867//GO:0061135	peptidase inhibitor activity//enzyme regulator activity//molecular function regulator//endopeptidase inhibitor activity//enzyme inhibitor activity//peptidase regulator activity//molecular_function//serine-type endopeptidase inhibitor activity//endopeptidase regulator activity	no KO assigned | (RefSeq) proteinase inhibitor II precursor
18	PGSC0003DMG400004643	3.96829	17.0052	8.73302	8.52106	9.31676	538.38	254.375	1.0817	0.0019755	0.012959	UP	530.29	521.211	0.024915	0.89552	1	FALSE	560.063	267.246	1.0674	0.00063134	0.0067559	UP	1030.6	267.239	1.9473	4.4492e-13	1.3702e-11	UP	486.27	954.257	-0.97262	0.00016617	0.0017343	FALSE	504.907	247.76	1.0271	0.001814	0.018454	UP	GO:0007154//GO:0043170//GO:0071704//GO:0016310//GO:0023014//GO:0006464//GO:0044260//GO:0051716//GO:0044237//GO:0008152//GO:0006793//GO:0036211//GO:0009987//GO:0044238//GO:0006468//GO:0007165//GO:0006796//GO:0019538//GO:0035556//GO:0050794//GO:0043412//GO:0044267//GO:0023052//GO:0050896//GO:0000160//GO:0050789//GO:0065007//GO:0008150	cell communication//macromolecule metabolic process//organic substance metabolic process//phosphorylation//signal transduction by protein phosphorylation//cellular protein modification process//cellular macromolecule metabolic process//cellular response to stimulus//cellular metabolic process//metabolic process//phosphorus metabolic process//protein modification process//cellular process//primary…	GO:0016020//GO:0016021//GO:0005575//GO:0044425//GO:0044464//GO:0031224//GO:0005622//GO:0005623	membrane//integral component of membrane//cellular_component//membrane part//cell part//intrinsic component of membrane//intracellular//cell	GO:0038023//GO:0004871//GO:0003674//GO:0016301//GO:0005057//GO:0060089//GO:0004673//GO:0016773//GO:0000155//GO:0016775//GO:0003824//GO:0004672//GO:0016772//GO:0016740	signaling receptor activity//obsolete signal transducer activity//molecular_function//kinase activity//obsolete signal transducer activity, downstream of receptor//molecular transducer activity//protein histidine kinase activity//phosphotransferase activity, alcohol group as acceptor//phosphorelay sensor kinase activity//phosphotransferase activity, nitrogenous group as acceptor//catalytic activi…	no KO assigned | (RefSeq) histidine kinase CKI1
19	PGSC0003DMG400004655	116.076	31.0498	39.9905	23.1753	54.1117	1216.46	6290.01	-2.3704	4.4303e-14	3.0192e-12	DOWN	2595.37	1178.14	1.1394	0.00017448	0.0025309	UP	2739.82	6624.59	-1.2738	1.2751e-07	5.3564e-06	DOWN	1572.95	6624.43	-2.0743	2.2533e-18	1.5101e-16	DOWN	1872.57	1455.88	0.36314	0.11859	0.30407	FALSE	1941.92	6135.25	-1.6596	5.5875e-10	4.6537e-08	DOWN	GO:0031668//GO:0009987//GO:1901700//GO:0031669//GO:0043562//GO:0050896//GO:0008150//GO:0042221//GO:0010033//GO:0071496//GO:0007154//GO:0031667//GO:0034285//GO:0009743//GO:0009744//GO:0051716//GO:0009991//GO:0009605	cellular response to extracellular stimulus//cellular process//response to oxygen-containing compound//cellular response to nutrient levels//cellular response to nitrogen levels//response to stimulus//biological_process//response to chemical//response to organic substance//cellular response to external stimulus//cell communication//response to nutrient levels//response to disaccharide//response t…	--	--	--	--	K07199 5'-AMP-activated protein kinase, regulatory beta subunit | (RefSeq) GAL83; SNF1-related protein kinase regulatory subunit beta-1-like
20	PGSC0003DMG400005545	12.4949	6.05999	5.3825	3.08234	6.54456	85.0093	356.03	-2.0663	1.1761e-07	2.745e-06	DOWN	164.852	82.3329	1.0016	0.031418	0.15788	FALSE	174	375.037	-1.1079	0.0012466	0.011644	DOWN	161.49	375.08	-1.2158	5.6904e-05	0.00033112	DOWN	133.28	149.347	-0.16421	0.63954	0.87416	FALSE	138.085	347.257	-1.3304	0.00020741	0.0033019	DOWN	GO:0034285//GO:0009743//GO:0007154//GO:0010033//GO:0071496//GO:0031667//GO:0009605//GO:0009991//GO:0051716//GO:0009744//GO:1901700//GO:0009987//GO:0031668//GO:0008150//GO:0042221//GO:0050896//GO:0031669//GO:0043562	response to disaccharide//response to carbohydrate//cell communication//response to organic substance//cellular response to external stimulus//response to nutrient levels//response to external stimulus//response to extracellular stimulus//cellular response to stimulus//response to sucrose//response to oxygen-containing compound//cellular process//cellular response to extracellular stimulus//biolo…	--	--	--	--	K07199 5'-AMP-activated protein kinase, regulatory beta subunit | (RefSeq) GAL83; SNF1-related protein kinase regulatory subunit beta-1-like
21	PGSC0003DMG400005626	4.07707	29.2473	17.3966	13.2864	20.7393	806.017	251.939	1.6777	1.7224e-05	0.0002339	UP	1150.25	781.249	0.5581	0.076165	0.29014	FALSE	1214.46	264.373	2.1997	5.7804e-14	9.6584e-12	UP	1719.8	264.456	2.7011	2.9223e-24	3.7235e-22	UP	939.059	1591.93	-0.76149	0.0020408	0.013553	FALSE	974.555	245.129	1.9912	1.4141e-10	1.4054e-08	UP	GO:0009059//GO:0019219//GO:2001141//GO:0044260//GO:1901576//GO:0009725//GO:0006725//GO:0019222//GO:0010033//GO:0014070//GO:0034645//GO:0006351//GO:0043170//GO:0097659//GO:0071704//GO:0009719//GO:0009733//GO:0044271//GO:1901360//GO:0006139//GO:1903506//GO:0008152//GO:0009651//GO:0006950//GO:0051252//GO:0046686//GO:0044237//GO:1901700//GO:0009058//GO:0006807//GO:0010467//GO:0010035//GO:0009739//GO:…	macromolecule biosynthetic process//regulation of nucleobase-containing compound metabolic process//regulation of RNA biosynthetic process//cellular macromolecule metabolic process//organic substance biosynthetic process//response to hormone//cellular aromatic compound metabolic process//regulation of metabolic process//response to organic substance//response to organic cyclic compound//cellular …	GO:0043231//GO:0005575//GO:0043229//GO:0043227//GO:0044424//GO:0005634//GO:0005622//GO:0043226//GO:0044464//GO:0005623	intracellular membrane-bounded organelle//cellular_component//intracellular organelle//membrane-bounded organelle//intracellular part//nucleus//intracellular//organelle//cell part//cell	GO:0003674//GO:0005488//GO:0097159//GO:1901363//GO:0003676//GO:0003677	molecular_function//binding//organic cyclic compound binding//heterocyclic compound binding//nucleic acid binding//DNA binding	no KO assigned | (RefSeq) transcription factor DIVARICATA
22	PGSC0003DMG400005762	7.93308	122.637	157.706	150.798	133.005	3827.18	208.003	4.2016	0.00034434	0.0030511	UP	3017.97	3694.59	-0.29184	0.65049	0.94351	FALSE	3179.97	220.169	3.8523	1.5516e-15	3.4892e-13	UP	2922.38	219.696	3.7336	0.0099012	0.029342	UP	3558.02	2711.82	0.39181	0.70714	0.91734	FALSE	3680.93	203.937	4.1739	0.0010269	0.0119	UP	GO:0051707//GO:0048583//GO:0002831//GO:0051704//GO:0045088//GO:0006950//GO:0080134//GO:0043207//GO:0009605//GO:0009627//GO:0010112//GO:0032101//GO:0002376//GO:0098542//GO:0031347//GO:0009607//GO:0009814//GO:0006955//GO:0006952//GO:0050896//GO:0043900//GO:0045087//GO:0050776//GO:0002682//GO:0050789//GO:0008150//GO:0065007	response to other organism//regulation of response to stimulus//regulation of response to biotic stimulus//multi-organism process//regulation of innate immune response//response to stress//regulation of response to stress//response to external biotic stimulus//response to external stimulus//systemic acquired resistance//regulation of systemic acquired resistance//regulation of response to externa…	--	--	--	--	no KO assigned | (RefSeq) protein NIM1-INTERACTING 2
23	PGSC0003DMG400006083	7.94999	28.5038	30.3082	20.8539	24.2319	1180.69	454.925	1.3759	0.0021068	0.013661	UP	1221.35	1141.63	0.097376	0.71128	0.97339	FALSE	1289.12	478.471	1.4299	6.5704e-06	0.00015925	UP	1534.11	478.489	1.6808	3.3349e-11	7.4666e-10	UP	1520.54	1420.52	0.098164	0.79536	0.96546	FALSE	1576.03	443.352	1.8298	1.9305e-06	6.2431e-05	UP	GO:0009987//GO:0006468//GO:0044238//GO:0036211//GO:0007165//GO:0006796//GO:0019538//GO:0050896//GO:0023052//GO:0043412//GO:0044267//GO:0050794//GO:0050789//GO:0008150//GO:0065007//GO:0043170//GO:0007154//GO:0071704//GO:0016310//GO:0006464//GO:0044260//GO:0051716//GO:0044237//GO:0008152//GO:0006793	cellular process//protein phosphorylation//primary metabolic process//protein modification process//signal transduction//phosphate-containing compound metabolic process//protein metabolic process//response to stimulus//signaling//macromolecule modification//cellular protein metabolic process//regulation of cellular process//regulation of biological process//biological_process//biological regulati…	--	--	GO:0004674//GO:0097159//GO:0016773//GO:0000166//GO:1901363//GO:0003824//GO:0030554//GO:0001883//GO:0004672//GO:0001882//GO:0016772//GO:0016740//GO:0097367//GO:0043167//GO:1901265//GO:0017076//GO:0003674//GO:0036094//GO:0016301//GO:0032553//GO:0043168//GO:0005524//GO:0035639//GO:0005488//GO:0032555//GO:0032549//GO:0032559//GO:0032550	protein serine/threonine kinase activity//organic cyclic compound binding//phosphotransferase activity, alcohol group as acceptor//nucleotide binding//heterocyclic compound binding//catalytic activity//adenyl nucleotide binding//purine nucleoside binding//protein kinase activity//nucleoside binding//transferase activity, transferring phosphorus-containing groups//transferase activity//carbohydrat…	no KO assigned | (RefSeq) CBL-interacting serine/threonine-protein kinase 7-like
24	PGSC0003DMG400007743	0.837372	3.00966	3.21687	4.58703	1.9134	998.19	186.855	2.4174	2.0842e-12	1.1224e-10	UP	375.007	965.541	-1.3644	3.3427e-05	0.00062018	DOWN	396.06	196.961	1.0078	0.0022083	0.018309	UP	625.035	196.849	1.6668	2.7825e-09	4.289e-08	UP	625.039	578.675	0.11119	0.84513	0.99172	FALSE	647.439	182.453	1.8272	0.00084573	0.010275	UP	GO:0009987//GO:0007165//GO:0023052//GO:0050896//GO:0006952//GO:0050794//GO:0050789//GO:0008150//GO:0065007//GO:0007154//GO:0051716//GO:0006950	cellular process//signal transduction//signaling//response to stimulus//defense response//regulation of cellular process//regulation of biological process//biological_process//biological regulation//cell communication//cellular response to stimulus//response to stress	--	--	GO:0097159//GO:0000166//GO:1901363//GO:0030554//GO:0001883//GO:0001882//GO:0097367//GO:0043167//GO:1901265//GO:0017076//GO:0003674//GO:0036094//GO:0032553//GO:0043168//GO:0043531//GO:0005488//GO:0032555//GO:0032559//GO:0032549//GO:0032550	organic cyclic compound binding//nucleotide binding//heterocyclic compound binding//adenyl nucleotide binding//purine nucleoside binding//nucleoside binding//carbohydrate derivative binding//ion binding//nucleoside phosphate binding//purine nucleotide binding//molecular_function//small molecule binding//ribonucleotide binding//anion binding//ADP binding//binding//purine ribonucleotide binding//ad…	no KO assigned | (RefSeq) TMV resistance protein N-like
25	PGSC0003DMG400007899	8.59996	56.2287	60.8582	81.7851	48.8786	7557.35	816.626	3.2101	3.0773e-23	5.9126e-21	UP	4076.91	7318.13	-0.844	0.0040568	0.034011	FALSE	4307.97	859.856	2.3248	3.2295e-18	1.0499e-15	UP	4993.51	859.989	2.5377	2.7814e-25	3.8767e-23	UP	4972.79	4624.87	0.10464	0.63952	0.87416	FALSE	5163.84	796.27	2.6971	8.4595e-12	1.0375e-09	UP	GO:0050794//GO:0044267//GO:0043412//GO:0050896//GO:0023052//GO:0065007//GO:0008150//GO:0050789//GO:0007165//GO:0036211//GO:0044238//GO:0006468//GO:0009987//GO:0019538//GO:0006796//GO:0008152//GO:0044237//GO:0051716//GO:0006793//GO:0016310//GO:0071704//GO:0043170//GO:0007154//GO:0044260//GO:0006464	regulation of cellular process//cellular protein metabolic process//macromolecule modification//response to stimulus//signaling//biological regulation//biological_process//regulation of biological process//signal transduction//protein modification process//primary metabolic process//protein phosphorylation//cellular process//protein metabolic process//phosphate-containing compound metabolic proce…	--	--	GO:0001883//GO:0030554//GO:0003824//GO:1901363//GO:0000166//GO:0016740//GO:0016772//GO:0001882//GO:0004672//GO:0097159//GO:0004674//GO:0016773//GO:0005524//GO:0043168//GO:0032553//GO:0016301//GO:0032550//GO:0032559//GO:0032549//GO:0032555//GO:0005488//GO:0035639//GO:0043167//GO:1901265//GO:0097367//GO:0036094//GO:0003674//GO:0017076	purine nucleoside binding//adenyl nucleotide binding//catalytic activity//heterocyclic compound binding//nucleotide binding//transferase activity//transferase activity, transferring phosphorus-containing groups//nucleoside binding//protein kinase activity//organic cyclic compound binding//protein serine/threonine kinase activity//phosphotransferase activity, alcohol group as acceptor//ATP binding…	no KO assigned | (RefSeq) CBL-interacting serine/threonine-protein kinase 6
26	PGSC0003DMG400008223	16.0404	5.60594	2.04104	5.6903	2.82501	562.757	1656.94	-1.5579	1.3646e-06	2.4675e-05	DOWN	251.752	545.866	-1.1165	0.074804	0.28674	FALSE	266.39	1745.62	-2.7121	5.1354e-21	2.6482e-18	DOWN	540.058	1745.29	-1.6923	1.7204e-11	4.0698e-10	DOWN	181.074	499.781	-1.4647	0.0013946	0.0099551	DOWN	187.914	1616.74	-3.1049	1.7901e-23	1.6174e-20	DOWN	GO:0006351//GO:0034645//GO:0043170//GO:0097659//GO:0071704//GO:0010033//GO:0035967//GO:0019222//GO:0071310//GO:0009642//GO:0006725//GO:0051254//GO:2001141//GO:0031328//GO:0009314//GO:0044260//GO:1901576//GO:0036294//GO:0048518//GO:0019219//GO:0009059//GO:0045893//GO:0009416//GO:0051173//GO:0051716//GO:0044237//GO:0042542//GO:1901698//GO:0010286//GO:0045935//GO:0006950//GO:0051252//GO:0009893//GO:…	transcription, DNA-templated//cellular macromolecule biosynthetic process//macromolecule metabolic process//nucleic acid-templated transcription//organic substance metabolic process//response to organic substance//cellular response to topologically incorrect protein//regulation of metabolic process//cellular response to organic substance//response to light intensity//cellular aromatic compound me…	GO:0043227//GO:0043229//GO:0005575//GO:0043231//GO:0044424//GO:0044464//GO:0043226//GO:0005622//GO:0005634//GO:0005623	membrane-bounded organelle//intracellular organelle//cellular_component//intracellular membrane-bounded organelle//intracellular part//cell part//organelle//intracellular//nucleus//cell	GO:0001067//GO:0044212//GO:0003700//GO:0003674//GO:0005488//GO:0097159//GO:0003676//GO:0003677//GO:1901363//GO:0043565	regulatory region nucleic acid binding//transcription regulatory region DNA binding//DNA-binding transcription factor activity//molecular_function//binding//organic cyclic compound binding//nucleic acid binding//DNA binding//heterocyclic compound binding//sequence-specific DNA binding	K09419 heat shock transcription factor, other eukaryote | (RefSeq) heat shock factor protein HSF30
27	PGSC0003DMG400009635	3.54081	26.8597	18.6725	26.3331	17.0684	1215.29	164.616	2.8841	1.0201e-16	9.7059e-15	UP	701.615	1176.66	-0.74594	0.043666	0.19952	FALSE	742.349	172.65	2.1043	0.0031637	0.023973	UP	1190.44	172.595	2.786	1.0614e-23	1.2706e-21	UP	764.761	1102.12	-0.5272	0.030732	0.11359	FALSE	793.394	160.225	2.3079	2.5857e-12	3.6196e-10	UP	GO:0051716//GO:0007154//GO:0065007//GO:0050896//GO:0050794//GO:0007165//GO:0008150//GO:0050789//GO:0023052//GO:0009987	cellular response to stimulus//cell communication//biological regulation//response to stimulus//regulation of cellular process//signal transduction//biological_process//regulation of biological process//signaling//cellular process	--	--	GO:0032549//GO:0032559//GO:0005488//GO:0043168//GO:0017076//GO:1901265//GO:0097367//GO:0001882//GO:0001883//GO:0000166//GO:0032550//GO:0043531//GO:0032555//GO:0032553//GO:0003674//GO:0036094//GO:0043167//GO:0030554//GO:1901363//GO:0097159	ribonucleoside binding//adenyl ribonucleotide binding//binding//anion binding//purine nucleotide binding//nucleoside phosphate binding//carbohydrate derivative binding//nucleoside binding//purine nucleoside binding//nucleotide binding//purine ribonucleoside binding//ADP binding//purine ribonucleotide binding//ribonucleotide binding//molecular_function//small molecule binding//ion binding//adenyl …	no KO assigned | (RefSeq) TMV resistance protein N-like
28	PGSC0003DMG400009914	3.80419	22.7674	14.4788	28.3692	11.5721	3225.09	441.959	2.8674	3.8869e-09	1.1885e-07	UP	1175.86	3117.95	-1.4069	0.00024798	0.00343	DOWN	1241.27	465.844	1.4139	1.7061e-07	6.8403e-06	UP	2457.54	465.609	2.4	5.349e-22	5.4571e-20	UP	1433.3	2276.93	-0.66775	0.0068996	0.035891	FALSE	1487.36	431.507	1.7853	7.9793e-06	0.00021788	UP	GO:0002684//GO:0009719//GO:0009605//GO:0006812//GO:0007186//GO:0050778//GO:0006811//GO:0080134//GO:0006950//GO:1901698//GO:0009630//GO:0051716//GO:0048518//GO:0051704//GO:0002252//GO:0009725//GO:0071495//GO:0072511//GO:0010033//GO:0007154//GO:0065007//GO:0009628//GO:0009753//GO:0032870//GO:0009629//GO:0071395//GO:0050776//GO:0045087//GO:0050794//GO:0071417//GO:0050896//GO:0006952//GO:0006955//GO:…	positive regulation of immune system process//response to endogenous stimulus//response to external stimulus//cation transport//G-protein coupled receptor signaling pathway//positive regulation of immune response//ion transport//regulation of response to stress//response to stress//response to nitrogen compound//gravitropism//cellular response to stimulus//positive regulation of biological proces…	GO:0044425//GO:0016021//GO:0031224//GO:0005575//GO:0016020	membrane part//integral component of membrane//intrinsic component of membrane//cellular_component//membrane	GO:0015085//GO:0004888//GO:0004871//GO:0008066//GO:0022890//GO:0015075//GO:0008324//GO:0046873//GO:0005215//GO:0022838//GO:0005261//GO:0015276//GO:0060089//GO:0004970//GO:0015267//GO:0003674//GO:0022836//GO:0005216//GO:0022834//GO:0038023//GO:0004930//GO:0022857//GO:0005230//GO:0005262//GO:0072509//GO:0022803	calcium ion transmembrane transporter activity//transmembrane signaling receptor activity//obsolete signal transducer activity//glutamate receptor activity//inorganic cation transmembrane transporter activity//ion transmembrane transporter activity//cation transmembrane transporter activity//metal ion transmembrane transporter activity//transporter activity//substrate-specific channel activity//c…	K05387 glutamate receptor, ionotropic, plant | (RefSeq) glutamate receptor 3.3
29	PGSC0003DMG400010439	0.678627	2.94648	8.66183	6.55891	3.36206	465.584	49.7671	3.2258	1.117e-11	5.3396e-10	UP	215.953	450.196	-1.0598	0.0098461	0.066954	FALSE	228.545	52.5663	2.1203	0.0014185	0.012876	UP	199.232	52.5474	1.9228	9.2048e-05	0.0005055	UP	553.761	184.482	1.5858	0.11674	0.30089	FALSE	573.155	48.6418	3.5587	0.0059163	0.044819	UP	GO:0008150//GO:0050789//GO:0023052//GO:0009987//GO:0051716//GO:0007154//GO:0065007//GO:0050794//GO:0050896//GO:0035556//GO:0007165	biological_process//regulation of biological process//signaling//cellular process//cellular response to stimulus//cell communication//biological regulation//regulation of cellular process//response to stimulus//intracellular signal transduction//signal transduction	GO:0005575//GO:0005623//GO:0005622//GO:0044464	cellular_component//cell//intracellular//cell part	GO:0003674//GO:0043167//GO:0005488//GO:0046872//GO:0043169	molecular_function//ion binding//binding//metal ion binding//cation binding	no KO assigned | (RefSeq) uncharacterized LOC102593110
30	PGSC0003DMG400010660	53.1999	157.948	132.13	119.544	145.789	5101.53	2346.15	1.1206	0.0005237	0.0043048	UP	5572.86	4937.41	0.17466	0.47097	0.81872	FALSE	5887.14	2475.76	1.2497	2.2289e-05	0.00044414	UP	6434.91	2475.91	1.378	8.5911e-08	9.7098e-07	UP	4974.56	5965.18	-0.262	0.2402	0.48642	FALSE	5160.07	2290.81	1.1715	5.7961e-06	0.00016412	UP	GO:0071248//GO:0009605//GO:1990267//GO:0009892//GO:0006801//GO:0010629//GO:0006950//GO:1990748//GO:0009744//GO:0044237//GO:0071484//GO:0071280//GO:0051716//GO:0031047//GO:0009416//GO:0035195//GO:0051704//GO:0009314//GO:0071493//GO:0019222//GO:0071324//GO:0010033//GO:0043170//GO:0071482//GO:0010468//GO:0065007//GO:0009628//GO:0040029//GO:0072593//GO:0000305//GO:0009411//GO:0060255//GO:0071470//GO:…	cellular response to metal ion//response to external stimulus//response to transition metal nanoparticle//negative regulation of metabolic process//superoxide metabolic process//negative regulation of gene expression//response to stress//cellular detoxification//response to sucrose//cellular metabolic process//cellular response to light intensity//cellular response to copper ion//cellular respons…	GO:0044424//GO:0043229//GO:0005623//GO:0044444//GO:0005634//GO:0005622//GO:0044464//GO:0005737//GO:0043231//GO:0005575//GO:0043227//GO:0005829//GO:0043226	intracellular part//intracellular organelle//cell//cytoplasmic part//nucleus//intracellular//cell part//cytoplasm//intracellular membrane-bounded organelle//cellular_component//membrane-bounded organelle//cytosol//organelle	GO:0005488//GO:0046872//GO:0016209//GO:0016721//GO:0043169//GO:0003674//GO:0043167//GO:0004784//GO:0016491//GO:0003824	binding//metal ion binding//antioxidant activity//oxidoreductase activity, acting on superoxide radicals as acceptor//cation binding//molecular_function//ion binding//superoxide dismutase activity//oxidoreductase activity//catalytic activity	K04565 superoxide dismutase, Cu-Zn family [EC:1.15.1.1] | (RefSeq) Cu/Zn-superoxide dismutase
31	PGSC0003DMG400010710	17.0419	5.72553	8.80285	7.44402	8.45112	1287.28	3050.07	-1.2445	5.2922e-05	0.0006227	DOWN	1340.85	1246.25	0.10555	0.78781	1	FALSE	1415.34	3216.64	-1.1844	2.9494e-06	7.9802e-05	DOWN	952.033	3217.73	-1.757	1.5756e-12	4.4464e-11	DOWN	1354.07	881.415	0.61941	0.010702	0.050589	FALSE	1404.37	2976.21	-1.0836	5.7762e-05	0.001164	DOWN	GO:0009987//GO:0006796//GO:0043412//GO:0016567//GO:0008150//GO:0071704//GO:0044260//GO:0008152//GO:0006793//GO:0032446//GO:0044238//GO:0006468//GO:0036211//GO:0019538//GO:0070647//GO:0044267//GO:0050896//GO:0016310//GO:0043170//GO:0006464//GO:0006950//GO:0044237	cellular process//phosphate-containing compound metabolic process//macromolecule modification//protein ubiquitination//biological_process//organic substance metabolic process//cellular macromolecule metabolic process//metabolic process//phosphorus metabolic process//protein modification by small protein conjugation//primary metabolic process//protein phosphorylation//protein modification process/…	GO:0016020//GO:0005575//GO:0031224//GO:0016021//GO:0044425	membrane//cellular_component//intrinsic component of membrane//integral component of membrane//membrane part	GO:0097159//GO:0003824//GO:0030554//GO:1901363//GO:0016740//GO:0043167//GO:0003674//GO:0036094//GO:0032553//GO:0005524//GO:0016301//GO:0032550//GO:0035639//GO:0032555//GO:0004842//GO:0016773//GO:0001883//GO:0000166//GO:0001882//GO:0016772//GO:0004672//GO:1901265//GO:0097367//GO:0017076//GO:0043168//GO:0032549//GO:0032559//GO:0019787//GO:0005488	organic cyclic compound binding//catalytic activity//adenyl nucleotide binding//heterocyclic compound binding//transferase activity//ion binding//molecular_function//small molecule binding//ribonucleotide binding//ATP binding//kinase activity//purine ribonucleoside binding//purine ribonucleoside triphosphate binding//purine ribonucleotide binding//ubiquitin-protein transferase activity//phosphotr…	no KO assigned | (RefSeq) U-box domain-containing protein 34-like
32	PGSC0003DMG400011293	636.705	167.098	155.903	225.27	175.261	9138.71	26834.8	-1.554	9.4352e-07	1.7897e-05	DOWN	6499.07	8850.64	-0.44555	0.10342	0.35318	FALSE	6858.41	28301.2	-2.0449	3.8225e-09	2.3968e-07	DOWN	6537.98	28290.5	-2.1134	1.1853e-09	1.9737e-08	DOWN	5657.55	6052.84	-0.097433	0.64378	0.8771	FALSE	5864.06	26205.5	-2.1599	1.1441e-09	8.747e-08	DOWN	GO:0051716//GO:0050896//GO:0009987//GO:0008150	cellular response to stimulus//response to stimulus//cellular process//biological_process	GO:0044425//GO:0031226//GO:0031225//GO:0031224//GO:0044464//GO:0005623//GO:0016020//GO:0005886//GO:0005575//GO:0071944//GO:0044459//GO:0046658	membrane part//intrinsic component of plasma membrane//anchored component of membrane//intrinsic component of membrane//cell part//cell//membrane//plasma membrane//cellular_component//cell periphery//plasma membrane part//anchored component of plasma membrane	--	--	no KO assigned | (RefSeq) plasma membrane-associated cation-binding protein 1
33	PGSC0003DMG400011517	2.07703	18.1746	11.3452	12.1128	14.3269	1405.6	243.19	2.531	6.7712e-14	4.5417e-12	UP	1507.04	1360.08	0.14802	0.62553	0.93021	FALSE	1589.83	255.375	2.6382	5.9066e-20	2.6767e-17	UP	2015.43	255.391	2.9803	1.5487e-29	3.193e-27	UP	1158.25	1866.11	-0.68809	0.0044701	0.025425	FALSE	1201.27	236.779	2.343	8.4661e-14	1.5502e-11	UP	GO:0008150//GO:0006952//GO:0050896//GO:0006950	biological_process//defense response//response to stimulus//response to stress	--	--	GO:0097159//GO:1901363//GO:0030554//GO:0036094//GO:0003674//GO:0043167//GO:0032555//GO:0043531//GO:0032550//GO:0032553//GO:0001882//GO:0000166//GO:0001883//GO:0017076//GO:0097367//GO:1901265//GO:0005488//GO:0032549//GO:0032559//GO:0043168	organic cyclic compound binding//heterocyclic compound binding//adenyl nucleotide binding//small molecule binding//molecular_function//ion binding//purine ribonucleotide binding//ADP binding//purine ribonucleoside binding//ribonucleotide binding//nucleoside binding//nucleotide binding//purine nucleoside binding//purine nucleotide binding//carbohydrate derivative binding//nucleoside phosphate bind…	no KO assigned | (RefSeq) disease resistance protein RPP13-like
34	PGSC0003DMG400012895	149.438	76.6525	67.3261	64.3339	82.1782	2299.57	5531.37	-1.2663	5.3341e-05	0.00062615	DOWN	2666.41	2225.25	0.26093	0.38985	0.74623	FALSE	2812.92	5837.57	-1.0533	0.00065458	0.0069429	DOWN	2624.83	5837.69	-1.1532	0.00021996	0.0010969	DOWN	2135.31	2430.35	-0.18672	0.39942	0.66899	FALSE	2213.94	5401.49	-1.2867	5.7598e-05	0.001162	DOWN	GO:0050896//GO:0006950//GO:0008150	response to stimulus//response to stress//biological_process	--	--	--	--	no KO assigned | (RefSeq) universal stress protein A-like protein
35	PGSC0003DMG400013392	1.98356	0.304799	0.219364	0.37849	0.484519	30.8012	165.034	-2.4217	5.166e-07	1.0409e-05	DOWN	35.2958	29.8042	0.24398	0.74336	0.98656	FALSE	37.2686	173.661	-2.2202	7.2212e-06	0.00017306	DOWN	23.7422	173.624	-2.8704	4.8648e-11	1.0534e-09	DOWN	15.6773	21.9899	-0.48817	0.64246	0.87622	FALSE	16.2456	160.923	-3.3083	2.3671e-09	1.6598e-07	DOWN	GO:0006793//GO:0008152//GO:0044260//GO:0071704//GO:0050789//GO:0008150//GO:0043412//GO:0023052//GO:0006796//GO:0009987//GO:0051716//GO:0044237//GO:0006464//GO:0043170//GO:0007154//GO:0016310//GO:0065007//GO:0044267//GO:0050896//GO:0050794//GO:0019538//GO:0044238//GO:0006468//GO:0036211//GO:0007165	phosphorus metabolic process//metabolic process//cellular macromolecule metabolic process//organic substance metabolic process//regulation of biological process//biological_process//macromolecule modification//signaling//phosphate-containing compound metabolic process//cellular process//cellular response to stimulus//cellular metabolic process//cellular protein modification process//macromolecule…	--	--	GO:0035639//GO:0032555//GO:0032550//GO:0016301//GO:0032553//GO:0005524//GO:0003674//GO:0036094//GO:0043167//GO:0016740//GO:1901363//GO:0003824//GO:0030554//GO:0097159//GO:0005488//GO:0032549//GO:0032559//GO:0043168//GO:0017076//GO:0097367//GO:1901265//GO:0004672//GO:0001882//GO:0016772//GO:0000166//GO:0001883//GO:0016773//GO:0004674	purine ribonucleoside triphosphate binding//purine ribonucleotide binding//purine ribonucleoside binding//kinase activity//ribonucleotide binding//ATP binding//molecular_function//small molecule binding//ion binding//transferase activity//heterocyclic compound binding//catalytic activity//adenyl nucleotide binding//organic cyclic compound binding//binding//ribonucleoside binding//adenyl ribonucle…	no KO assigned | (RefSeq) CBL-interacting serine/threonine-protein kinase 7-like
36	PGSC0003DMG400013549	14.0405	2.36258	1.98138	1.08794	2.17785	33.7903	459.432	-3.7652	2.0746e-19	2.6746e-17	DOWN	61.5855	32.8254	0.90778	0.19644	0.51727	FALSE	65.1069	484.017	-2.8942	1.0604e-14	2.1144e-12	DOWN	72.3238	483.937	-2.7423	8.7935e-18	5.3606e-16	DOWN	54.7822	66.8356	-0.28691	0.71118	0.92004	FALSE	57.013	448.274	-2.975	1.7627e-14	3.5755e-12	DOWN	GO:0010033//GO:0009725//GO:0009719//GO:0050896//GO:0009733//GO:0042221//GO:0008150	response to organic substance//response to hormone//response to endogenous stimulus//response to stimulus//response to auxin//response to chemical//biological_process	--	--	--	--	no KO assigned | (RefSeq) auxin-responsive protein SAUR72-like
37	PGSC0003DMG400013575	0.187946	1.67945	1.40395	1.23714	1.65901	41.7494	6.55352	2.6714	0.0011848	0.0085226	UP	51.5357	40.4444	0.34963	0.63352	0.93423	FALSE	54.2563	6.90524	2.974	0.00074314	0.0076938	UP	54.6238	6.89935	2.985	2.1144e-05	0.00013658	UP	42.7473	50.532	-0.24136	0.62752	0.86513	FALSE	44.2727	6.39956	2.7904	0.0020833	0.020454	UP	GO:0009733//GO:0042221//GO:0008150//GO:0009719//GO:0009725//GO:0010033//GO:0050896	response to auxin//response to chemical//biological_process//response to endogenous stimulus//response to hormone//response to organic substance//response to stimulus	--	--	--	--	K14488 SAUR family protein | (RefSeq) auxin-responsive protein SAUR72-like
38	PGSC0003DMG400013765	21.6327	3.44601	6.07785	1.47622	10.2597	224.009	3413.54	-3.9296	7.9097e-23	1.4363e-20	DOWN	1432.73	217.493	2.7197	3.1314e-15	3.7054e-13	UP	1514.3	3588.1	-1.2446	3.7649e-06	9.8948e-05	DOWN	510.621	3587.14	-2.8125	3.1873e-17	1.8162e-15	DOWN	835.136	473.695	0.81805	0.0020197	0.01344	FALSE	866.282	3326.63	-1.9412	5.8621e-11	6.3101e-09	DOWN	GO:0009987//GO:0051171//GO:0080090//GO:1901362//GO:0009889//GO:0050789//GO:0044249//GO:0031323//GO:0008150//GO:0042221//GO:0031326//GO:0006355//GO:2000112//GO:0023052//GO:0019438//GO:0009755//GO:0044260//GO:1901576//GO:2001141//GO:0097659//GO:0071704//GO:0034645//GO:0006351//GO:0071310//GO:0006725//GO:1903506//GO:0009733//GO:0051252//GO:0008152//GO:0010467//GO:0006807//GO:0009058//GO:0044238//GO:…	cellular process//regulation of nitrogen compound metabolic process//regulation of primary metabolic process//organic cyclic compound biosynthetic process//regulation of biosynthetic process//regulation of biological process//cellular biosynthetic process//regulation of cellular metabolic process//biological_process//response to chemical//regulation of cellular biosynthetic process//regulation of…	GO:0043226//GO:0005575//GO:0043231//GO:0043227//GO:0005622//GO:0005634//GO:0044464//GO:0005623//GO:0043229//GO:0044424	organelle//cellular_component//intracellular membrane-bounded organelle//membrane-bounded organelle//intracellular//nucleus//cell part//cell//intracellular organelle//intracellular part	--	--	K14484 auxin-responsive protein IAA | (RefSeq) auxin-responsive protein IAA29-like
39	PGSC0003DMG400014104	0.00654252	21.6414	3.56273	3.32481	7.68603	150.489	0.295844	8.9906	0.0019636	0.012892	UP	314.031	146.414	1.1009	0.38327	0.73924	FALSE	332.22	0.307304	10.078	0.00020845	0.0027721	UP	980.507	0.30619	11.645	0.00064713	0.0028055	UP	144.012	902.409	-2.6476	0.17657	0.39733	FALSE	150.166	0.287341	9.0296	0.0036331	0.031192	UP	GO:0006950//GO:1901575//GO:0044238//GO:0006629//GO:0050896//GO:0006952//GO:0071704//GO:0008152//GO:0009056//GO:0008150//GO:0016042	response to stress//organic substance catabolic process//primary metabolic process//lipid metabolic process//response to stimulus//defense response//organic substance metabolic process//metabolic process//catabolic process//biological_process//lipid catabolic process	GO:0043229//GO:0044424//GO:0005622//GO:0044464//GO:0044444//GO:0005623//GO:0005575//GO:0043231//GO:0043227//GO:0005737//GO:0043226//GO:0005773	intracellular organelle//intracellular part//intracellular//cell part//cytoplasmic part//cell//cellular_component//intracellular membrane-bounded organelle//membrane-bounded organelle//cytoplasm//organelle//vacuole	GO:0045735//GO:0003674//GO:0016787//GO:0003824	nutrient reservoir activity//molecular_function//hydrolase activity//catalytic activity	no KO assigned | (RefSeq) Patatin-01, Patatin-02, Patatin-03, Patatin-05, Patatin-07, Patatin-13, Patatin-16, pat1, pat1-k1; patatin-05-like
40	PGSC0003DMG400015693	0.625216	2.2304	2.82324	2.02586	2.50418	190.258	59.0419	1.6881	0.0010682	0.0078338	UP	210.221	184.2	0.19063	0.58409	0.90366	FALSE	222.394	61.9217	1.8446	0.00072459	0.0075432	UP	200.389	61.897	1.6949	7.538e-06	5.4238e-05	UP	231.929	185.74	0.3204	0.34496	0.61061	FALSE	240.937	57.4712	2.0677	0.00016579	0.0027508	UP	GO:0050896//GO:0050794//GO:0065007//GO:0007165//GO:0051716//GO:0007154//GO:0023052//GO:0008150//GO:0050789//GO:0009987	response to stimulus//regulation of cellular process//biological regulation//signal transduction//cellular response to stimulus//cell communication//signaling//biological_process//regulation of biological process//cellular process	--	--	GO:0001883//GO:0000166//GO:0001882//GO:0043168//GO:0032549//GO:0032559//GO:0005488//GO:1901265//GO:0097367//GO:0017076//GO:0030554//GO:1901363//GO:0097159//GO:0032553//GO:0032550//GO:0043531//GO:0032555//GO:0043167//GO:0003674//GO:0036094	purine nucleoside binding//nucleotide binding//nucleoside binding//anion binding//ribonucleoside binding//adenyl ribonucleotide binding//binding//nucleoside phosphate binding//carbohydrate derivative binding//purine nucleotide binding//adenyl nucleotide binding//heterocyclic compound binding//organic cyclic compound binding//ribonucleotide binding//purine ribonucleoside binding//ADP binding//puri…	no KO assigned | (RefSeq) TMV resistance protein N-like
41	PGSC0003DMG400015977	0.184166	3.1828	1.17873	2.28813	2.26869	137.603	11.1149	3.6299	0.00057533	0.0046547	UP	120.044	132.86	-0.14633	0.87185	1	FALSE	126.493	11.6943	3.4352	3.1624e-05	0.00058968	UP	179.988	11.6874	3.9449	6.0066e-07	5.6503e-06	UP	61.9532	166.911	-1.4298	0.0092538	0.045065	DOWN	64.2503	10.8416	2.5671	0.00055621	0.0072866	UP	GO:0051716//GO:0044237//GO:0006464//GO:0016310//GO:0007154//GO:0043170//GO:0065007//GO:0044267//GO:0050896//GO:0050794//GO:0019538//GO:0007165//GO:0044238//GO:0006468//GO:0036211//GO:0006793//GO:0008152//GO:0044260//GO:0071704//GO:0008150//GO:0050789//GO:0043412//GO:0023052//GO:0006796//GO:0009987	cellular response to stimulus//cellular metabolic process//cellular protein modification process//phosphorylation//cell communication//macromolecule metabolic process//biological regulation//cellular protein metabolic process//response to stimulus//regulation of cellular process//protein metabolic process//signal transduction//primary metabolic process//protein phosphorylation//protein modificati…	--	--	GO:0032549//GO:0032559//GO:0005488//GO:0043168//GO:0017076//GO:1901265//GO:0097367//GO:0001882//GO:0016772//GO:0004672//GO:0001883//GO:0000166//GO:0016773//GO:0032550//GO:0035639//GO:0032555//GO:0032553//GO:0005524//GO:0016301//GO:0003674//GO:0036094//GO:0043167//GO:0016740//GO:0003824//GO:0030554//GO:1901363//GO:0097159	ribonucleoside binding//adenyl ribonucleotide binding//binding//anion binding//purine nucleotide binding//nucleoside phosphate binding//carbohydrate derivative binding//nucleoside binding//transferase activity, transferring phosphorus-containing groups//protein kinase activity//purine nucleoside binding//nucleotide binding//phosphotransferase activity, alcohol group as acceptor//purine ribonucleo…	no KO assigned | (RefSeq) CBL-interacting serine/threonine-protein kinase 20
42	PGSC0003DMG400016180	17.485	0.0997648	1.16194	0.13454	1.73383	4.04626	552.359	-7.0929	3.3852e-06	5.5853e-05	DOWN	48.7301	3.94381	3.6272	0.00041162	0.0052645	UP	51.5971	578.351	-3.4866	0.0024482	0.019753	DOWN	3.05678	577.852	-7.5625	5.9427e-07	5.5973e-06	DOWN	33.001	2.80939	3.5542	0.0008273	0.0065581	UP	34.2076	537.415	-3.9736	0.00095996	0.011327	DOWN	GO:0009416//GO:2000241//GO:0009648//GO:0009909//GO:0009314//GO:0032501//GO:0022414//GO:0048856//GO:0048580//GO:0010228//GO:0048573//GO:0007275//GO:0065007//GO:0009628//GO:0003006//GO:0050896//GO:0090567//GO:0061458//GO:0032502//GO:0048367//GO:0009908//GO:0009791//GO:0051239//GO:0048831//GO:0008150//GO:0050789//GO:0048731//GO:2000026//GO:0048608//GO:0050793	response to light stimulus//regulation of reproductive process//photoperiodism//regulation of flower development//response to radiation//multicellular organismal process//reproductive process//anatomical structure development//regulation of post-embryonic development//vegetative to reproductive phase transition of meristem//photoperiodism, flowering//multicellular organism development//biological…	--	--	GO:0008429//GO:0005488//GO:0043168//GO:0005543//GO:0003674//GO:0043167//GO:0008289	phosphatidylethanolamine binding//binding//anion binding//phospholipid binding//molecular_function//ion binding//lipid binding	K16223 protein FLOWERING LOCUS T | (RefSeq) protein FLOWERING LOCUS T-like
43	PGSC0003DMG400016458	1.71244	10.0031	7.41289	6.63456	13.1115	471.587	124.077	1.9263	0.0015643	0.010736	UP	838.712	457.439	0.8746	0.16814	0.47377	FALSE	887.549	130.099	2.7702	0.0019883	0.016828	UP	693.603	130.105	2.4144	0.00020157	0.0010155	UP	469.53	640.912	-0.44891	0.33918	0.60485	FALSE	487.415	120.703	2.0137	5.2112e-07	2.0472e-05	UP	GO:0051234//GO:0006810//GO:0042221//GO:0008150//GO:0009987//GO:0006855//GO:0015893//GO:0042493//GO:0050896//GO:0051179//GO:0055085	establishment of localization//transport//response to chemical//biological_process//cellular process//drug transmembrane transport//drug transport//response to drug//response to stimulus//localization//transmembrane transport	GO:0005575//GO:0016020//GO:0031224//GO:0044425//GO:0016021	cellular_component//membrane//intrinsic component of membrane//membrane part//integral component of membrane	GO:0022857//GO:0015238//GO:0015297//GO:0003674//GO:0015291//GO:0022804//GO:0005215	transmembrane transporter activity//drug transmembrane transporter activity//antiporter activity//molecular_function//secondary active transmembrane transporter activity//active transmembrane transporter activity//transporter activity	K03327 multidrug resistance protein, MATE family | (RefSeq) protein DETOXIFICATION 40-like
44	PGSC0003DMG400016590	1557.83	480.775	574.641	410.275	620.316	16304.2	64114.7	-1.9754	9.298e-11	3.7759e-09	DOWN	22448.1	15784.8	0.50806	0.080121	0.30041	FALSE	23689.5	67617.7	-1.5132	1.6916e-10	1.4708e-08	DOWN	18389.6	67630.6	-1.8788	2.2756e-14	8.3199e-13	DOWN	20562.3	17016.6	0.27306	0.55605	0.81115	FALSE	21301.1	62572.9	-1.5546	1.6478e-08	9.4484e-07	DOWN	GO:0008150//GO:0071214//GO:0071486//GO:0009987//GO:0071478//GO:0009642//GO:0009411//GO:0071482//GO:0009628//GO:0050896//GO:0009611//GO:0071492//GO:0009644//GO:0034644//GO:0070141//GO:0051716//GO:0071484//GO:0006950//GO:0009314//GO:0009416	biological_process//cellular response to abiotic stimulus//cellular response to high light intensity//cellular process//cellular response to radiation//response to light intensity//response to UV//cellular response to light stimulus//response to abiotic stimulus//response to stimulus//response to wounding//cellular response to UV-A//response to high light intensity//cellular response to UV//respo…	GO:0031976//GO:0009536//GO:0044436//GO:0034357//GO:0009579//GO:0043226//GO:0009507//GO:0005737//GO:0043231//GO:0005575//GO:0016020//GO:0043227//GO:0031984//GO:0044434//GO:0009534//GO:0044444//GO:0005623//GO:0005622//GO:0044464//GO:0031224//GO:0042651//GO:0044424//GO:0055035//GO:0044425//GO:0043229//GO:0044446//GO:0044422//GO:0016021//GO:0009535//GO:0044435	plastid thylakoid//plastid//thylakoid part//photosynthetic membrane//thylakoid//organelle//chloroplast//cytoplasm//intracellular membrane-bounded organelle//cellular_component//membrane//membrane-bounded organelle//organelle subcompartment//chloroplast part//chloroplast thylakoid//cytoplasmic part//cell//intracellular//cell part//intrinsic component of membrane//thylakoid membrane//intracellular …	--	--	no KO assigned | (RefSeq) stress enhanced protein 2, chloroplastic
45	PGSC0003DMG400018570	2.67106	0.448676	1.34533	1.26394	1.18123	207.597	459.534	-1.1464	0.0015055	0.0104	DOWN	180.642	201.357	-0.15662	0.66453	0.95178	FALSE	190.432	484.438	-1.347	3.2233e-05	0.0005974	DOWN	71.7499	484.465	-2.7553	6.7621e-18	4.165e-16	DOWN	198.2	66.5075	1.5754	4.021e-05	0.00052207	UP	205.538	448.437	-1.1255	0.0011722	0.013144	DOWN	GO:0008150//GO:0006950//GO:0050896//GO:0006952	biological_process//response to stress//response to stimulus//defense response	--	--	GO:0032553//GO:0032550//GO:0032555//GO:0043531//GO:0043167//GO:0036094//GO:0003674//GO:0030554//GO:1901363//GO:0097159//GO:0043168//GO:0032559//GO:0032549//GO:0005488//GO:1901265//GO:0097367//GO:0017076//GO:0001883//GO:0000166//GO:0001882	ribonucleotide binding//purine ribonucleoside binding//purine ribonucleotide binding//ADP binding//ion binding//small molecule binding//molecular_function//adenyl nucleotide binding//heterocyclic compound binding//organic cyclic compound binding//anion binding//adenyl ribonucleotide binding//ribonucleoside binding//binding//nucleoside phosphate binding//carbohydrate derivative binding//purine nuc…	no KO assigned | (RefSeq) uncharacterized LOC102593400
46	PGSC0003DMG400020494	0.828121	5.63238	3.0896	3.03996	4.18089	115.63	32.0274	1.8521	0.00032041	0.0028834	UP	142.954	111.838	0.35414	0.41904	0.7733	FALSE	150.862	33.7001	2.1624	2.6514e-05	0.00050802	UP	204.349	33.6913	2.6006	8.6745e-11	1.7896e-09	UP	103.92	189.191	-0.86436	0.018464	0.076914	FALSE	107.756	31.2304	1.7867	0.00124	0.013718	UP	GO:0072593//GO:0050896//GO:0042743//GO:0044237//GO:0006950//GO:0008150//GO:0006979//GO:0055114//GO:0009056//GO:0009987//GO:0044248//GO:0042744//GO:0008152	reactive oxygen species metabolic process//response to stimulus//hydrogen peroxide metabolic process//cellular metabolic process//response to stress//biological_process//response to oxidative stress//oxidation-reduction process//catabolic process//cellular process//cellular catabolic process//hydrogen peroxide catabolic process//metabolic process	GO:0005576//GO:0005575	extracellular region//cellular_component	GO:0020037//GO:0016209//GO:0043169//GO:0005488//GO:0046872//GO:0016491//GO:1901363//GO:0003824//GO:0016684//GO:0097159//GO:0004601//GO:0046906//GO:0003674//GO:0043167	heme binding//antioxidant activity//cation binding//binding//metal ion binding//oxidoreductase activity//heterocyclic compound binding//catalytic activity//oxidoreductase activity, acting on peroxide as acceptor//organic cyclic compound binding//peroxidase activity//tetrapyrrole binding//molecular_function//ion binding	K00430 peroxidase [EC:1.11.1.7] | (RefSeq) peroxidase 41-like
47	PGSC0003DMG400020520	9.25409	2.63109	3.6013	3.07438	4.05231	228.634	717.379	-1.6497	2.7474e-05	0.00034981	DOWN	275.941	221.398	0.31772	0.43838	0.79052	FALSE	291.082	757.256	-1.3794	0.00030635	0.0037817	DOWN	188.371	757.17	-2.007	3.2326e-06	2.551e-05	DOWN	239.032	174.404	0.45477	0.17464	0.39468	FALSE	247.707	700.722	-1.5002	0.00016568	0.0027505	DOWN	GO:0008150//GO:0050896//GO:0009628//GO:0009314//GO:0009416	biological_process//response to stimulus//response to abiotic stimulus//response to radiation//response to light stimulus	--	--	--	--	no KO assigned | (RefSeq) plant intracellular Ras-group-related LRR protein 5-like
48	PGSC0003DMG400020708	92.9284	3.07857	15.0196	11.2091	19.0797	893.346	7582.03	-3.0853	6.394e-22	1.0638e-19	DOWN	1378.02	863.826	0.67379	0.028412	0.14663	FALSE	1454.06	7993.61	-2.4588	4.5522e-21	2.4313e-18	DOWN	232.456	7992.13	-5.1035	1.8278e-53	1.596e-50	DOWN	1053.66	215.71	2.2882	7.4463e-10	3.9464e-08	UP	1091.98	7401.21	-2.7608	7.2216e-23	5.8196e-20	DOWN	GO:0008150//GO:0051234//GO:0006810//GO:0009624//GO:0009607//GO:0043207//GO:0051707//GO:0050896//GO:0051179//GO:0009605//GO:0051704	biological_process//establishment of localization//transport//response to nematode//response to biotic stimulus//response to external biotic stimulus//response to other organism//response to stimulus//localization//response to external stimulus//multi-organism process	GO:0071944//GO:0005575//GO:0005886//GO:0016020//GO:0005623//GO:0044464//GO:0031224//GO:0044425//GO:0016021	cell periphery//cellular_component//plasma membrane//membrane//cell//cell part//intrinsic component of membrane//membrane part//integral component of membrane	GO:0003674//GO:0005215	molecular_function//transporter activity	no KO assigned | (RefSeq) protein NRT1/ PTR FAMILY 4.3
49	PGSC0003DMG400021103	126.024	45.9659	40.1841	50.5505	44.29	2594.4	6644.46	-1.3568	6.9338e-06	0.00010595	DOWN	2055.73	2510.06	-0.28807	0.32499	0.68113	FALSE	2169.22	7003.32	-1.6909	5.6172e-12	6.7472e-10	DOWN	2256.38	7003.02	-1.634	2.9144e-12	7.7809e-11	DOWN	1826.09	2089.18	-0.19418	0.40314	0.67306	FALSE	1893.12	6484.03	-1.7761	4.28e-11	4.7091e-09	DOWN	GO:0010033//GO:0051704//GO:0006950//GO:0009605//GO:0008219//GO:0098542//GO:1901700//GO:0006955//GO:0009814//GO:0045087//GO:0050896//GO:0006952//GO:0009816//GO:0051707//GO:0014070//GO:0043207//GO:0042742//GO:0016265//GO:0009987//GO:0002376//GO:0009607//GO:0009751//GO:0001101//GO:0009617//GO:0042221//GO:0008150	response to organic substance//multi-organism process//response to stress//response to external stimulus//cell death//defense response to other organism//response to oxygen-containing compound//immune response//defense response, incompatible interaction//innate immune response//response to stimulus//defense response//defense response to bacterium, incompatible interaction//response to other organ…	GO:0044424//GO:0044464//GO:0005622//GO:0005623//GO:0005575//GO:0005737	intracellular part//cell part//intracellular//cell//cellular_component//cytoplasm	GO:1901618//GO:0015101//GO:0005215//GO:0015075//GO:0008324//GO:0022890//GO:0003674//GO:0015665//GO:0015077//GO:0046624//GO:0010175//GO:0015166//GO:0008519//GO:0022857//GO:0005319	organic hydroxy compound transmembrane transporter activity//organic cation transmembrane transporter activity//transporter activity//ion transmembrane transporter activity//cation transmembrane transporter activity//inorganic cation transmembrane transporter activity//molecular_function//alcohol transmembrane transporter activity//monovalent inorganic cation transmembrane transporter activity//s…	no KO assigned | (RefSeq) accelerated cell death 11
50	PGSC0003DMG400022019	11.0293	77.8039	47.1478	153.222	49.7881	11691.3	866.847	3.7535	1.4033e-16	1.2979e-14	UP	3437.91	11305.2	-1.7174	6.592e-07	1.9348e-05	DOWN	3631.23	914.935	1.9887	8.9526e-12	1.0066e-09	UP	5653.3	914.691	2.6277	1.9445e-27	3.4159e-25	UP	3172.21	5234.93	-0.72268	0.00087823	0.0068905	FALSE	3291.33	846.803	1.9586	3.2461e-12	4.4195e-10	UP	GO:0006796//GO:0009987//GO:0050789//GO:0008150//GO:0043412//GO:0023052//GO:0044260//GO:0071704//GO:0006793//GO:0008152//GO:0019538//GO:0044238//GO:0006468//GO:0036211//GO:0007165//GO:0065007//GO:0044267//GO:0050896//GO:0050794//GO:0006464//GO:0043170//GO:0007154//GO:0016310//GO:0044237//GO:0051716	phosphate-containing compound metabolic process//cellular process//regulation of biological process//biological_process//macromolecule modification//signaling//cellular macromolecule metabolic process//organic substance metabolic process//phosphorus metabolic process//metabolic process//protein metabolic process//primary metabolic process//protein phosphorylation//protein modification process//si…	--	--	GO:0097159//GO:0016740//GO:1901363//GO:0030554//GO:0003824//GO:0003674//GO:0036094//GO:0043167//GO:0035639//GO:0032555//GO:0032550//GO:0016301//GO:0032553//GO:0005524//GO:0016773//GO:0004674//GO:0004672//GO:0001882//GO:0016772//GO:0000166//GO:0001883//GO:0017076//GO:0097367//GO:1901265//GO:0005488//GO:0032559//GO:0032549//GO:0043168	organic cyclic compound binding//transferase activity//heterocyclic compound binding//adenyl nucleotide binding//catalytic activity//molecular_function//small molecule binding//ion binding//purine ribonucleoside triphosphate binding//purine ribonucleotide binding//purine ribonucleoside binding//kinase activity//ribonucleotide binding//ATP binding//phosphotransferase activity, alcohol group as acc…	no KO assigned | (RefSeq) CBL-interacting serine/threonine-protein kinase 14-like
51	PGSC0003DMG400022396	24.4756	7.80876	10.3344	8.05783	10.9583	639.662	2003.83	-1.6474	1.8358e-07	4.1325e-06	DOWN	793.21	619.154	0.3574	0.28418	0.63467	FALSE	836.618	2112.31	-1.3362	2.1347e-07	8.2594e-06	DOWN	594.901	2112.39	-1.8282	1.6333e-13	5.3639e-12	DOWN	726.743	550.825	0.39985	0.11549	0.29858	FALSE	753.786	1955.41	-1.3752	1.0829e-06	3.821e-05	DOWN	GO:0008150//GO:0050896//GO:0006950	biological_process//response to stimulus//response to stress	--	--	--	--	no KO assigned | (RefSeq) universal stress protein MT2085
52	PGSC0003DMG400023181	0.0516605	1.42982	1.45465	0.91342	1.21943	73.3349	4.22088	4.1189	3.2894e-08	8.4962e-07	UP	87.9965	71.0528	0.30856	0.52202	0.86057	FALSE	93.1821	4.43055	4.3945	8.7517e-06	0.00020354	UP	110.918	4.43314	4.645	3.3008e-14	1.1835e-12	UP	103.269	102.765	0.0070688	0.96858	1	FALSE	107.337	4.10637	4.7081	1.2854e-07	5.9888e-06	UP	GO:0009719//GO:0051716//GO:0006974//GO:0006950//GO:0009415//GO:0010033//GO:0009725//GO:0009414//GO:0009628//GO:0050896//GO:0009737//GO:1901700//GO:0097305//GO:0008150//GO:0042221//GO:0001101//GO:0033993//GO:0010035//GO:0033554//GO:0009987	response to endogenous stimulus//cellular response to stimulus//cellular response to DNA damage stimulus//response to stress//response to water//response to organic substance//response to hormone//response to water deprivation//response to abiotic stimulus//response to stimulus//response to abscisic acid//response to oxygen-containing compound//response to alcohol//biological_process//response to…	--	--	--	--	no KO assigned | (RefSeq) WD repeat-containing protein 76
53	PGSC0003DMG400023622	50.8571	21.5836	16.9686	19.4476	20.0197	586.832	1584.17	-1.4327	6.4304e-06	9.9174e-05	DOWN	544.585	568.419	-0.061798	0.88647	1	FALSE	575.163	1668.56	-1.5366	1.4772e-08	8.1363e-07	DOWN	627.969	1668.63	-1.4099	1.3588e-08	1.827e-07	DOWN	454.554	581.194	-0.35457	0.19118	0.41845	FALSE	471.657	1545.15	-1.7119	4.1931e-09	2.797e-07	DOWN	GO:0050896//GO:0044267//GO:0009628//GO:0009266//GO:0044238//GO:1901700//GO:0019538//GO:0009408//GO:0006950//GO:0044237//GO:0043170//GO:0006979//GO:0042221//GO:0008150//GO:0000302//GO:0009987//GO:0006457//GO:0008152//GO:0071704//GO:0044260	response to stimulus//cellular protein metabolic process//response to abiotic stimulus//response to temperature stimulus//primary metabolic process//response to oxygen-containing compound//protein metabolic process//response to heat//response to stress//cellular metabolic process//macromolecule metabolic process//response to oxidative stress//response to chemical//biological_process//response to …	GO:0005623//GO:0044444//GO:0044439//GO:0044464//GO:0031907//GO:0005622//GO:0031974//GO:0044424//GO:0042579//GO:0044422//GO:0043229//GO:0044446//GO:0043226//GO:0044438//GO:0005737//GO:0043233//GO:0005777//GO:0043227//GO:0005782//GO:0005575//GO:0043231//GO:0070013	cell//cytoplasmic part//peroxisomal part//cell part//microbody lumen//intracellular//membrane-enclosed lumen//intracellular part//microbody//organelle part//intracellular organelle//intracellular organelle part//organelle//microbody part//cytoplasm//organelle lumen//peroxisome//membrane-bounded organelle//peroxisomal matrix//cellular_component//intracellular membrane-bounded organelle//intracellu…	--	--	K13993 HSP20 family protein | (RefSeq) 15.7 kDa heat shock protein, peroxisomal
54	PGSC0003DMG400024320	0.977783	0.328605	0.32498	0.233897	0.232721	24.5235	108.695	-2.148	0.0012845	0.0091036	DOWN	22.4683	23.818	-0.084161	0.93021	1	FALSE	23.6953	114.71	-2.2753	0.00048005	0.0054351	DOWN	33.7323	114.607	-1.7645	0.0027577	0.0098272	DOWN	31.2241	31.2567	-0.0015087	0.99353	1	FALSE	32.3177	106.245	-1.717	0.0050634	0.039941	DOWN	GO:0006139//GO:1901360//GO:0044271//GO:0009719//GO:0071365//GO:0051716//GO:0044237//GO:0009734//GO:0019219//GO:0009059//GO:0007154//GO:0043170//GO:0010033//GO:0019222//GO:0071495//GO:0009725//GO:0034641//GO:0016070//GO:0032870//GO:0065007//GO:0010468//GO:0032774//GO:0050896//GO:0018130//GO:0050794//GO:0034654//GO:0010556//GO:0060255//GO:0010467//GO:0006807//GO:0009058//GO:0044238//GO:0046483//GO:…	nucleobase-containing compound metabolic process//organic cyclic compound metabolic process//cellular nitrogen compound biosynthetic process//response to endogenous stimulus//cellular response to auxin stimulus//cellular response to stimulus//cellular metabolic process//auxin-activated signaling pathway//regulation of nucleobase-containing compound metabolic process//macromolecule biosynthetic pr…	GO:0044424//GO:0043229//GO:0005623//GO:0005622//GO:0005634//GO:0044464//GO:0005575//GO:0043231//GO:0043227//GO:0043226	intracellular part//intracellular organelle//cell//intracellular//nucleus//cell part//cellular_component//intracellular membrane-bounded organelle//membrane-bounded organelle//organelle	GO:0005488//GO:0003677//GO:0003674//GO:0003676//GO:1901363//GO:0097159	binding//DNA binding//molecular_function//nucleic acid binding//heterocyclic compound binding//organic cyclic compound binding	no KO assigned | (RefSeq) auxin response factor 18-like
55	PGSC0003DMG400025162	12.2873	1.2438	2.92138	1.51392	5.36378	59.5659	496.391	-3.0589	4.8481e-15	3.7995e-13	DOWN	189.699	57.6671	1.7179	0.00021275	0.0029964	UP	200.387	522.407	-1.3824	2.4523e-05	0.00047969	DOWN	46.9553	522.4	-3.4758	1.6232e-25	2.3508e-23	DOWN	103.182	43.5249	1.2453	0.048509	0.15921	FALSE	107.037	483.964	-2.1768	3.5945e-10	3.1156e-08	DOWN	GO:0009987//GO:0023052//GO:0050789//GO:0008150//GO:0007165//GO:0035556//GO:0050896//GO:0050794//GO:0065007//GO:0007154//GO:0051716	cellular process//signaling//regulation of biological process//biological_process//signal transduction//intracellular signal transduction//response to stimulus//regulation of cellular process//biological regulation//cell communication//cellular response to stimulus	GO:0005575//GO:0044464//GO:0005622//GO:0005623	cellular_component//cell part//intracellular//cell	--	--	no KO assigned | (RefSeq) uncharacterized LOC102590985
56	PGSC0003DMG400025361	118.193	15.3534	39.466	11.0051	34.0192	1651.77	18523.2	-3.4872	8.0514e-27	2.1602e-24	DOWN	4745.7	1602.35	1.5664	0.00016647	0.0024347	UP	5011.73	19516	-1.9613	2.6809e-16	6.8533e-14	DOWN	2248.12	19523.8	-3.1184	9.338e-38	3.2615e-35	DOWN	5296.83	2080.3	1.3483	2.4924e-06	4.9349e-05	UP	5495.59	18063.4	-1.7167	1.3913e-10	1.3874e-08	DOWN	GO:0050789//GO:0015672//GO:0034762//GO:0006810//GO:0051234//GO:0008150//GO:0009638//GO:0043412//GO:0023052//GO:0051049//GO:0006796//GO:0048519//GO:0009658//GO:0009902//GO:0032413//GO:0009987//GO:0009606//GO:0007623//GO:0006793//GO:0051641//GO:0051640//GO:0008152//GO:0032412//GO:0009657//GO:0009904//GO:0044260//GO:0044092//GO:0019750//GO:0048511//GO:0010359//GO:0051649//GO:0071704//GO:0034220//GO:…	regulation of biological process//monovalent inorganic cation transport//regulation of transmembrane transport//transport//establishment of localization//biological_process//phototropism//macromolecule modification//signaling//regulation of transport//phosphate-containing compound metabolic process//negative regulation of biological process//chloroplast organization//chloroplast relocation//negat…	GO:0098552//GO:0005773//GO:0044459//GO:0043226//GO:0009898//GO:0009986//GO:0071944//GO:0005737//GO:0043231//GO:0098562//GO:0005575//GO:0005886//GO:0016020//GO:0043227//GO:0044444//GO:0005623//GO:0005622//GO:0044464//GO:0044424//GO:0044425//GO:0043229	side of membrane//vacuole//plasma membrane part//organelle//cytoplasmic side of plasma membrane//cell surface//cell periphery//cytoplasm//intracellular membrane-bounded organelle//cytoplasmic side of membrane//cellular_component//plasma membrane//membrane//membrane-bounded organelle//cytoplasmic part//cell//intracellular//cell part//intracellular part//membrane part//intracellular organelle	GO:0016740//GO:1901363//GO:0003676//GO:0003824//GO:0030554//GO:0050662//GO:0004673//GO:0097159//GO:0032555//GO:0035639//GO:0032550//GO:0003729//GO:0016301//GO:0005524//GO:0032553//GO:0010181//GO:0036094//GO:0003674//GO:0038023//GO:0009882//GO:0009881//GO:0043167//GO:0004672//GO:0016772//GO:0001882//GO:0000166//GO:0016775//GO:0001883//GO:0003723//GO:0005515//GO:0016773//GO:0000155//GO:0004674//GO:…	transferase activity//heterocyclic compound binding//nucleic acid binding//catalytic activity//adenyl nucleotide binding//coenzyme binding//protein histidine kinase activity//organic cyclic compound binding//purine ribonucleotide binding//purine ribonucleoside triphosphate binding//purine ribonucleoside binding//mRNA binding//kinase activity//ATP binding//ribonucleotide binding//FMN binding//smal…	K20715 phototropin [EC:2.7.11.1] | (RefSeq) phototropin-1
57	PGSC0003DMG400025433	2.70828	0.990745	0.827682	0.182731	0.567545	11.6196	179.745	-3.9513	8.1906e-12	4.0053e-10	DOWN	33.2504	11.2674	1.5612	0.09772	0.3407	FALSE	35.0965	189.448	-2.4324	5.64e-07	1.9191e-05	DOWN	61.2197	189.286	-1.6285	0.00088479	0.0036815	DOWN	47.3	56.7271	-0.2622	0.72856	0.93146	FALSE	49.0154	175.552	-1.8406	9.3053e-05	0.0017255	DOWN	GO:0055085//GO:0051179//GO:0050896//GO:0042493//GO:0009987//GO:0006855//GO:0015893//GO:0008150//GO:0042221//GO:0006810//GO:0051234	transmembrane transport//localization//response to stimulus//response to drug//cellular process//drug transmembrane transport//drug transport//biological_process//response to chemical//transport//establishment of localization	GO:0016021//GO:0044425//GO:0031224//GO:0016020//GO:0005575	integral component of membrane//membrane part//intrinsic component of membrane//membrane//cellular_component	GO:0005215//GO:0022804//GO:0015291//GO:0003674//GO:0015297//GO:0015238//GO:0022857	transporter activity//active transmembrane transporter activity//secondary active transmembrane transporter activity//molecular_function//antiporter activity//drug transmembrane transporter activity//transmembrane transporter activity	K03327 multidrug resistance protein, MATE family | (RefSeq) protein DETOXIFICATION 16-like
58	PGSC0003DMG400025927	1926.81	336.158	315.617	200.372	540.382	7150.34	70902.5	-3.3098	5.2463e-25	1.166e-22	DOWN	17659	6918.89	1.3518	0.00031146	0.004155	UP	18622.8	74753.5	-2.0051	2.4376e-16	6.3397e-14	DOWN	11513.3	74745	-2.6987	1.5431e-26	2.4763e-24	DOWN	10023.5	10650.4	-0.087522	0.73701	0.93605	FALSE	10384.8	69207.4	-2.7365	8.0562e-24	7.7487e-21	DOWN	GO:0098542//GO:0007275//GO:0042330//GO:0050918//GO:0006935//GO:0050896//GO:0006952//GO:0003006//GO:0048316//GO:0009793//GO:0022414//GO:0044703//GO:0032501//GO:0051704//GO:0009790//GO:0006950//GO:0010154//GO:0048856//GO:0009605//GO:0040011//GO:0032502//GO:0009607//GO:0010183//GO:0009856//GO:0048608//GO:0048731//GO:0042221//GO:0008150//GO:0009791//GO:0044706//GO:0051707//GO:0050832//GO:0043207//GO:…	defense response to other organism//multicellular organism development//taxis//positive chemotaxis//chemotaxis//response to stimulus//defense response//developmental process involved in reproduction//seed development//embryo development ending in seed dormancy//reproductive process//multi-organism reproductive process//multicellular organismal process//multi-organism process//embryo development//…	GO:0044464//GO:0005634//GO:0005622//GO:0005623//GO:0044444//GO:0043229//GO:0044424//GO:0043226//GO:0005829//GO:0009536//GO:0043227//GO:0043231//GO:0005575//GO:0009507//GO:0005737	cell part//nucleus//intracellular//cell//cytoplasmic part//intracellular organelle//intracellular part//organelle//cytosol//plastid//membrane-bounded organelle//intracellular membrane-bounded organelle//cellular_component//chloroplast//cytoplasm	GO:0044877//GO:0005515//GO:0005488//GO:0036033//GO:0003674	protein-containing complex binding//protein binding//binding//mediator complex binding//molecular_function	no KO assigned | (RefSeq) uncharacterized LOC102591329
59	PGSC0003DMG400026148	8.16063	213.098	41.4246	132.265	27.0044	6279.36	395.333	3.9895	1.5741e-32	7.3248e-30	UP	1176.96	6079.48	-2.3689	2.7812e-15	3.3172e-13	DOWN	1240.72	415.539	1.5781	0.00012896	0.0018783	UP	9727.98	415	4.551	2.1209e-66	3.1482e-63	UP	1773.02	9007.62	-2.3449	2.4839e-25	2.3161e-22	DOWN	1837.9	385.679	2.2526	0.0054948	0.0425	UP	GO:0008150//GO:0008152//GO:0050896//GO:0006950	biological_process//metabolic process//response to stimulus//response to stress	--	--	GO:0016788//GO:0003824//GO:0003674//GO:0016787	hydrolase activity, acting on ester bonds//catalytic activity//molecular_function//hydrolase activity	no KO assigned | (RefSeq) ap1; universal stress protein A-like protein
60	PGSC0003DMG400026515	0.0746405	4.19693	2.52195	3.055	1.81786	134.462	3.24653	5.3722	5.6681e-13	3.3229e-11	UP	71.4916	129.989	-0.86255	0.090135	0.32336	FALSE	75.6283	3.3997	4.4754	2.3884e-07	9.0444e-06	UP	175.236	3.4049	5.6855	3.1567e-09	4.8233e-08	UP	99.6871	162.482	-0.7048	0.25713	0.50742	FALSE	103.297	3.15095	5.0349	0.0037777	0.032137	UP	GO:0009628//GO:0051172//GO:0032774//GO:0071482//GO:0010468//GO:0045934//GO:0065007//GO:0048523//GO:0009639//GO:0016070//GO:0034641//GO:0060255//GO:0010556//GO:0034654//GO:0050896//GO:0031327//GO:0003006//GO:0050794//GO:0018130//GO:0006807//GO:0045892//GO:0009058//GO:1901700//GO:0010467//GO:0010243//GO:0090304//GO:0007165//GO:0046483//GO:0031324//GO:0044238//GO:0007275//GO:0009719//GO:0010200//GO:…	response to abiotic stimulus//negative regulation of nitrogen compound metabolic process//RNA biosynthetic process//cellular response to light stimulus//regulation of gene expression//negative regulation of nucleobase-containing compound metabolic process//biological regulation//negative regulation of cellular process//response to red or far red light//RNA metabolic process//cellular nitrogen com…	GO:0005623//GO:0005622//GO:0005634//GO:0044464//GO:0044424//GO:0043229//GO:0043226//GO:0005737//GO:0005575//GO:0043231//GO:0043227	cell//intracellular//nucleus//cell part//intracellular part//intracellular organelle//organelle//cytoplasm//cellular_component//intracellular membrane-bounded organelle//membrane-bounded organelle	GO:0046914//GO:0043169//GO:0005488//GO:0046872//GO:0008270//GO:0003674//GO:0043167	transition metal ion binding//cation binding//binding//metal ion binding//zinc ion binding//molecular_function//ion binding	no KO assigned | (RefSeq) B-box zinc finger protein 32
61	PGSC0003DMG400027093	218.438	81.6196	110.552	104.628	115.122	9931.01	21426.7	-1.1094	0.00020987	0.0020208	DOWN	10071.9	9624.95	0.06549	0.9115	1	FALSE	10622.8	22552.4	-1.0861	2.3217e-06	6.5324e-05	DOWN	7514.79	22558	-1.5858	3.2846e-12	8.6677e-11	DOWN	9368.4	6951.66	0.43044	0.045742	0.1526	FALSE	9714.19	20886	-1.1044	2.5248e-05	0.00058675	DOWN	GO:0012501//GO:0034614//GO:0034599//GO:0097468//GO:1901701//GO:0010035//GO:0033554//GO:0016265//GO:0009987//GO:0000302//GO:0010343//GO:0042221//GO:0008150//GO:0006979//GO:0008219//GO:0000304//GO:0051716//GO:0006950//GO:1901700//GO:0036473//GO:0071452//GO:0070887//GO:0050896	programmed cell death//cellular response to reactive oxygen species//cellular response to oxidative stress//programmed cell death in response to reactive oxygen species//cellular response to oxygen-containing compound//response to inorganic substance//cellular response to stress//obsolete death//cellular process//response to reactive oxygen species//singlet oxygen-mediated programmed cell death//…	GO:0005575//GO:0016020//GO:0034357//GO:0009579//GO:0044436//GO:0042651//GO:0044424//GO:0005622//GO:0044464//GO:0005623	cellular_component//membrane//photosynthetic membrane//thylakoid//thylakoid part//thylakoid membrane//intracellular part//intracellular//cell part//cell	--	--	no KO assigned | (RefSeq) EX1; protein EXECUTER 1, chloroplastic
62	PGSC0003DMG400027130	74.5764	35.8145	33.6871	31.208	40.7483	2852.04	6989.86	-1.2933	1.5808e-05	0.00021684	DOWN	3372.7	2761.17	0.28863	0.31167	0.66669	FALSE	3560.82	7358.93	-1.0473	1.2384e-05	0.00027456	DOWN	3144.32	7359.34	-1.2268	8.7245e-08	9.841e-07	DOWN	2739.98	2910.01	-0.086862	0.67578	0.89697	FALSE	2840.6	6815.82	-1.2627	1.378e-06	4.6799e-05	DOWN	GO:0071704//GO:0008152//GO:0009987//GO:0009056//GO:0023052//GO:0016042//GO:0050789//GO:0008150//GO:0007154//GO:0051716//GO:0044238//GO:0007165//GO:0035556//GO:1901575//GO:0050794//GO:0050896//GO:0065007//GO:0006629	organic substance metabolic process//metabolic process//cellular process//catabolic process//signaling//lipid catabolic process//regulation of biological process//biological_process//cell communication//cellular response to stimulus//primary metabolic process//signal transduction//intracellular signal transduction//organic substance catabolic process//regulation of cellular process//response to s…	GO:0005575//GO:0044464//GO:0005622//GO:0005623	cellular_component//cell part//intracellular//cell	GO:0004629//GO:0003674//GO:0016787//GO:0004620//GO:0008081//GO:0003824//GO:0016298//GO:0016788//GO:0004871//GO:0004435//GO:0060089//GO:0042578	phospholipase C activity//molecular_function//hydrolase activity//phospholipase activity//phosphoric diester hydrolase activity//catalytic activity//lipase activity//hydrolase activity, acting on ester bonds//obsolete signal transducer activity//phosphatidylinositol phospholipase C activity//molecular transducer activity//phosphoric ester hydrolase activity	K05857 phosphatidylinositol phospholipase C, delta [EC:3.1.4.11] | (RefSeq) plc3; phosphoinositide phospholipase C 2-like
63	PGSC0003DMG400027194	0.00429267	1.99024	0.31447	0.794892	0.351737	56.5711	0.295844	7.5791	1.2786e-10	5.0839e-09	UP	22.7832	54.7842	-1.2658	0.073115	0.28231	FALSE	24.0007	0.307304	6.2873	0.00075986	0.0078287	UP	135.766	0.30619	8.7925	1.8131e-17	1.0617e-15	UP	19.466	125.966	-2.694	6.6527e-06	0.00011496	DOWN	20.2631	0.287341	6.1399	0.0015712	0.016519	UP	GO:0006950//GO:0051716//GO:0044237//GO:2000762//GO:0043455//GO:1901360//GO:0044550//GO:0019222//GO:0070417//GO:0050794//GO:0050896//GO:0065007//GO:0009808//GO:0050826//GO:0009628//GO:1901141//GO:0009809//GO:0009266//GO:0009058//GO:1900376//GO:0008152//GO:0006725//GO:0009409//GO:0071704//GO:0019748//GO:1901576//GO:0019438//GO:0071497//GO:0008150//GO:0031326//GO:0044249//GO:0031323//GO:0050789//GO:…	response to stress//cellular response to stimulus//cellular metabolic process//regulation of phenylpropanoid metabolic process//regulation of secondary metabolic process//organic cyclic compound metabolic process//secondary metabolite biosynthetic process//regulation of metabolic process//cellular response to cold//regulation of cellular process//response to stimulus//biological regulation//ligni…	GO:0044424//GO:0043229//GO:0005623//GO:0044464//GO:0005634//GO:0005622//GO:0043227//GO:0043231//GO:0005575//GO:0043226	intracellular part//intracellular organelle//cell//cell part//nucleus//intracellular//membrane-bounded organelle//intracellular membrane-bounded organelle//cellular_component//organelle	GO:0042393//GO:0005488//GO:0005515//GO:0003674	histone binding//binding//protein binding//molecular_function	no KO assigned | (RefSeq) ultraviolet-B receptor UVR8
64	PGSC0003DMG400027997	53.9809	156.866	168.481	155.331	141.663	7090.67	2501.33	1.5032	5.3272e-05	0.00062558	UP	5814.4	6856.36	-0.23781	0.42969	0.78291	FALSE	6136.27	2632.78	1.2208	5.5281e-07	1.8853e-05	UP	6810.95	2633.99	1.3706	4.1451e-09	6.1747e-08	UP	6770.39	6309.11	0.1018	0.65608	0.88471	FALSE	7021.9	2437.66	1.5264	1.1768e-08	7.0036e-07	UP	GO:0046483//GO:0044238//GO:0090304//GO:0006807//GO:0006310//GO:0050896//GO:0034641//GO:0006259//GO:0043170//GO:0051716//GO:0044237//GO:0006950//GO:0006974//GO:1901360//GO:0006139//GO:0006302//GO:0009987//GO:0006281//GO:0033554//GO:0000725//GO:0008150//GO:0071704//GO:0006725//GO:0044260//GO:0008152//GO:0000724	heterocycle metabolic process//primary metabolic process//nucleic acid metabolic process//nitrogen compound metabolic process//DNA recombination//response to stimulus//cellular nitrogen compound metabolic process//DNA metabolic process//macromolecule metabolic process//cellular response to stimulus//cellular metabolic process//response to stress//cellular response to DNA damage stimulus//organic …	GO:0044464//GO:0005622//GO:0044444//GO:0005623//GO:0043229//GO:0044424//GO:0043226//GO:0009536//GO:0043227//GO:0005575//GO:0043231//GO:0005737//GO:0009507	cell part//intracellular//cytoplasmic part//cell//intracellular organelle//intracellular part//organelle//plastid//membrane-bounded organelle//cellular_component//intracellular membrane-bounded organelle//cytoplasm//chloroplast	--	--	no KO assigned | (RefSeq) uncharacterized LOC102587460
65	PGSC0003DMG400028191	0.197178	2.17065	2.07238	0.695304	2.91163	70.5417	20.2915	1.7976	0.0033634	0.019898	UP	269.188	68.3322	1.978	4.4076e-06	0.00010398	UP	283.842	21.3012	3.7361	1.289e-15	2.9582e-13	UP	211.649	21.2692	3.3148	4.1384e-15	1.7135e-13	UP	186.035	195.981	-0.07514	0.87088	1	FALSE	192.977	19.7854	3.2859	5.3264e-11	5.7751e-09	UP	GO:0009987//GO:0008150//GO:0042221//GO:0006810//GO:0051234//GO:0050789//GO:0023052//GO:0009755//GO:0071310//GO:0009733//GO:0051179//GO:0007165//GO:0070887//GO:0065007//GO:0032870//GO:0050794//GO:0050896//GO:0009725//GO:0071495//GO:0010033//GO:0007154//GO:0071365//GO:0009719//GO:0055085//GO:0009734//GO:0051716	cellular process//biological_process//response to chemical//transport//establishment of localization//regulation of biological process//signaling//hormone-mediated signaling pathway//cellular response to organic substance//response to auxin//localization//signal transduction//cellular response to chemical stimulus//biological regulation//cellular response to hormone stimulus//regulation of cellul…	GO:0005575//GO:0016020//GO:0031224//GO:0016021//GO:0044425	cellular_component//membrane//intrinsic component of membrane//integral component of membrane//membrane part	--	--	K13947 auxin efflux carrier family | (RefSeq) probable auxin efflux carrier component 1b
66	PGSC0003DMG400028284	63.4516	28.8858	29.8338	22.9564	33.469	2211.89	6293.93	-1.5087	6.9198e-07	1.346e-05	DOWN	2938.47	2141.26	0.4566	0.12924	0.40586	FALSE	3100.66	6630.65	-1.0966	4.5656e-06	0.00011671	DOWN	2673.9	6631.06	-1.3103	1.5867e-08	2.102e-07	DOWN	2553.41	2475.4	0.044762	0.83604	0.98612	FALSE	2647.57	6139.54	-1.2135	4.7635e-06	0.00013803	DOWN	GO:0050790//GO:0008152//GO:0009987//GO:0008150//GO:0050789//GO:0023052//GO:0019222//GO:0007154//GO:0051716//GO:0007165//GO:0065009//GO:0065007//GO:0050896//GO:0050794	regulation of catalytic activity//metabolic process//cellular process//biological_process//regulation of biological process//signaling//regulation of metabolic process//cell communication//cellular response to stimulus//signal transduction//regulation of molecular function//biological regulation//response to stimulus//regulation of cellular process	GO:0005575//GO:0032991//GO:0000159//GO:1902494//GO:0008287//GO:0044424//GO:1903293//GO:0005622//GO:0044464//GO:0005623	cellular_component//protein-containing complex//protein phosphatase type 2A complex//catalytic complex//protein serine/threonine phosphatase complex//intracellular part//phosphatase complex//intracellular//cell part//cell	GO:0003674//GO:0019888//GO:0030234//GO:0019208//GO:0098772	molecular_function//protein phosphatase regulator activity//enzyme regulator activity//phosphatase regulator activity//molecular function regulator	K11584 serine/threonine-protein phosphatase 2A regulatory subunit B' | (RefSeq) serine/threonine protein phosphatase 2A 57 kDa regulatory subunit B' beta isoform-like
67	PGSC0003DMG400030631	2.89088	0.416984	0.438748	0.225184	0.409961	12.4556	166.268	-3.7386	8.0265e-07	1.5452e-05	DOWN	20.3032	12.0463	0.75311	0.47459	0.82193	FALSE	21.4718	175.726	-3.0328	2.8156e-05	0.00053332	DOWN	21.7586	175.732	-3.0137	8.5038e-05	0.00047224	DOWN	21.3216	20.2747	0.072636	0.9975	1	FALSE	22.1352	162.499	-2.876	4.3401e-05	0.00091649	DOWN	GO:0009987//GO:0006855//GO:0015893//GO:0042221//GO:0008150//GO:0051234//GO:0006810//GO:0051179//GO:0042493//GO:0050896//GO:0055085	cellular process//drug transmembrane transport//drug transport//response to chemical//biological_process//establishment of localization//transport//localization//response to drug//response to stimulus//transmembrane transport	GO:0005575//GO:0016020//GO:0031224//GO:0016021//GO:0044425	cellular_component//membrane//intrinsic component of membrane//integral component of membrane//membrane part	GO:0015238//GO:0022857//GO:0003674//GO:0015291//GO:0015297//GO:0005215//GO:0022804	drug transmembrane transporter activity//transmembrane transporter activity//molecular_function//secondary active transmembrane transporter activity//antiporter activity//transporter activity//active transmembrane transporter activity	K03327 multidrug resistance protein, MATE family | (RefSeq) protein DETOXIFICATION 14-like
68	PGSC0003DMG400030891	111.161	21.692	17.5662	395.147	15.4518	39109.1	11473.8	1.7692	1.901e-08	5.1607e-07	UP	1391.46	37831.8	-4.7649	1.0978e-44	2.2782e-41	DOWN	1469.2	12135.2	-3.0461	0.00046716	0.0053086	DOWN	2048.94	12133.8	-2.5661	0.0017577	0.0066713	DOWN	1522.25	1897.03	-0.31753	0.19601	0.42541	FALSE	1580.35	11220.1	-2.8278	0.00094098	0.011178	DOWN	GO:0009409//GO:0008150//GO:0006979//GO:0080167//GO:0006950//GO:0009628//GO:0050896//GO:0009266	response to cold//biological_process//response to oxidative stress//response to karrikin//response to stress//response to abiotic stimulus//response to stimulus//response to temperature stimulus	GO:0005737//GO:0009507//GO:0005575//GO:0043231//GO:0043227//GO:0030054//GO:0009536//GO:0055044//GO:0043226//GO:0005911//GO:0044424//GO:0043229//GO:0044444//GO:0005623//GO:0005622//GO:0009506//GO:0044464	cytoplasm//chloroplast//cellular_component//intracellular membrane-bounded organelle//membrane-bounded organelle//cell junction//plastid//symplast//organelle//cell-cell junction//intracellular part//intracellular organelle//cytoplasmic part//cell//intracellular//plasmodesma//cell part	GO:0003729//GO:0003674//GO:0003824//GO:0003676//GO:1901363//GO:0097159//GO:0005488//GO:0003723	mRNA binding//molecular_function//catalytic activity//nucleic acid binding//heterocyclic compound binding//organic cyclic compound binding//binding//RNA binding	K06617 raffinose synthase [EC:2.4.1.82] | (RefSeq) probable galactinol--sucrose galactosyltransferase 6
69	PGSC0003DMG400030996	0.0239014	1.40942	1.1332	1.10488	0.791492	28.1122	0.678504	5.3727	0.00036732	0.0032193	UP	18.9018	27.2962	-0.53017	0.52389	0.8622	FALSE	19.9302	0.723538	4.7837	0.006096	0.039593	UP	34.8954	0.722052	5.5948	7.3554e-07	6.8027e-06	UP	26.4893	32.3999	-0.29058	0.60718	0.84849	FALSE	27.445	0.668074	5.3604	0.00024883	0.0038102	UP	GO:0006464//GO:0032268//GO:0019222//GO:0007154//GO:0043170//GO:0051174//GO:0023051//GO:0009892//GO:0010646//GO:0051336//GO:0006470//GO:0051716//GO:0044237//GO:0016311//GO:0019220//GO:0019538//GO:0043666//GO:0065009//GO:0007165//GO:0044238//GO:0036211//GO:0035303//GO:0065007//GO:0060255//GO:0044267//GO:0050896//GO:0050794//GO:0044092//GO:0031399//GO:0009966//GO:0044260//GO:0048583//GO:0071704//GO:…	cellular protein modification process//regulation of cellular protein metabolic process//regulation of metabolic process//cell communication//macromolecule metabolic process//regulation of phosphorus metabolic process//regulation of signaling//negative regulation of metabolic process//regulation of cell communication//regulation of hydrolase activity//protein dephosphorylation//cellular response …	--	--	GO:0004857//GO:0019208//GO:0098772//GO:0003674//GO:0019888//GO:0004864//GO:0030234//GO:0019212	enzyme inhibitor activity//phosphatase regulator activity//molecular function regulator//molecular_function//protein phosphatase regulator activity//protein phosphatase inhibitor activity//enzyme regulator activity//phosphatase inhibitor activity	K16833 protein phosphatase inhibitor 2 | (RefSeq) protein phosphatase inhibitor 2-like
70	PGSC0003DMG400032147	10.9736	129.367	223.633	166.18	99.9894	7863.49	535.7	3.8757	0.00014281	0.0014545	UP	4357.78	7632.89	-0.80864	0.19539	0.5161	FALSE	4606.55	562.449	3.0339	2.5131e-21	1.3919e-18	UP	5994.25	562.59	3.4134	3.558e-15	1.492e-13	UP	9584.21	5550.27	0.7881	0.14222	0.34416	FALSE	9953.26	521.426	4.2546	7.2565e-07	2.7493e-05	UP	GO:0009987//GO:0044248//GO:0009056//GO:0055114//GO:0006979//GO:0008150//GO:0008152//GO:0042744//GO:0042743//GO:0050896//GO:0072593//GO:0044237//GO:0006950	cellular process//cellular catabolic process//catabolic process//oxidation-reduction process//response to oxidative stress//biological_process//metabolic process//hydrogen peroxide catabolic process//hydrogen peroxide metabolic process//response to stimulus//reactive oxygen species metabolic process//cellular metabolic process//response to stress	GO:0005575//GO:0005576	cellular_component//extracellular region	GO:0097159//GO:1901363//GO:0003824//GO:0016684//GO:0016491//GO:0043167//GO:0003674//GO:0046906//GO:0004601//GO:0043169//GO:0016209//GO:0020037//GO:0046872//GO:0005488	organic cyclic compound binding//heterocyclic compound binding//catalytic activity//oxidoreductase activity, acting on peroxide as acceptor//oxidoreductase activity//ion binding//molecular_function//tetrapyrrole binding//peroxidase activity//cation binding//antioxidant activity//heme binding//metal ion binding//binding	K00430 peroxidase [EC:1.11.1.7] | (RefSeq) lignin-forming anionic peroxidase-like
71	PGSC0003DMG400032199	34.0451	280.086	900.599	210.036	657.937	11204.7	1801.14	2.6371	0.00036228	0.0031814	UP	32123.4	10824.8	1.5693	0.055346	0.23505	FALSE	33893.4	1888.96	4.1653	0.00023552	0.003072	UP	14128.6	1890.63	2.9017	1.1399e-09	1.9093e-08	UP	42195.2	13091.7	1.6884	1.3814e-08	5.1652e-07	UP	43764.4	1750.83	4.6436	1.67e-32	4.1496e-29	UP	GO:0008150//GO:0006979//GO:0009056//GO:0055114//GO:0009987//GO:0044248//GO:0008152//GO:0042744//GO:0072593//GO:0050896//GO:0042743//GO:0044237//GO:0006950	biological_process//response to oxidative stress//catabolic process//oxidation-reduction process//cellular process//cellular catabolic process//metabolic process//hydrogen peroxide catabolic process//reactive oxygen species metabolic process//response to stimulus//hydrogen peroxide metabolic process//cellular metabolic process//response to stress	GO:0005575//GO:0005576	cellular_component//extracellular region	GO:0016491//GO:1901363//GO:0003824//GO:0016684//GO:0097159//GO:0046906//GO:0004601//GO:0003674//GO:0043167//GO:0020037//GO:0016209//GO:0043169//GO:0005488//GO:0046872	oxidoreductase activity//heterocyclic compound binding//catalytic activity//oxidoreductase activity, acting on peroxide as acceptor//organic cyclic compound binding//tetrapyrrole binding//peroxidase activity//molecular_function//ion binding//heme binding//antioxidant activity//cation binding//binding//metal ion binding	K00430 peroxidase [EC:1.11.1.7] | (RefSeq) lignin-forming anionic peroxidase-like
72	PGSC0003DMG400034307	162.496	53.5533	54.5964	49.735	64.6746	7150.65	24452.5	-1.7738	9.8346e-08	2.3348e-06	DOWN	8589.16	6930.59	0.30954	0.3791	0.73566	FALSE	9061.71	25801.2	-1.5096	2.2235e-06	6.3156e-05	DOWN	7465.95	25801.8	-1.7891	4.8192e-08	5.7413e-07	DOWN	7040.77	6909.7	0.027109	0.89515	1	FALSE	7298.98	23875.6	-1.7098	9.5089e-08	4.6027e-06	DOWN	GO:0006793//GO:0008152//GO:0044260//GO:0071704//GO:0023014//GO:0050789//GO:0008150//GO:0023052//GO:0043412//GO:0006796//GO:0009987//GO:0044237//GO:0051716//GO:0006464//GO:0007154//GO:0043170//GO:0016310//GO:0000160//GO:0065007//GO:0050794//GO:0050896//GO:0044267//GO:0035556//GO:0019538//GO:0036211//GO:0006468//GO:0044238//GO:0007165	phosphorus metabolic process//metabolic process//cellular macromolecule metabolic process//organic substance metabolic process//signal transduction by protein phosphorylation//regulation of biological process//biological_process//signaling//macromolecule modification//phosphate-containing compound metabolic process//cellular process//cellular metabolic process//cellular response to stimulus//cell…	GO:0005575//GO:0016020//GO:0044425//GO:0016021//GO:0005623//GO:0005622//GO:0044464//GO:0031224	cellular_component//membrane//membrane part//integral component of membrane//cell//intracellular//cell part//intrinsic component of membrane	GO:0016301//GO:0003674//GO:0038023//GO:0016740//GO:0003824//GO:0004673//GO:0004871//GO:0004672//GO:0016772//GO:0016775//GO:0016773//GO:0000155//GO:0060089//GO:0005057	kinase activity//molecular_function//signaling receptor activity//transferase activity//catalytic activity//protein histidine kinase activity//obsolete signal transducer activity//protein kinase activity//transferase activity, transferring phosphorus-containing groups//phosphotransferase activity, nitrogenous group as acceptor//phosphotransferase activity, alcohol group as acceptor//phosphorelay …	K14489 arabidopsis histidine kinase 2/3/4 (cytokinin receptor) [EC:2.7.13.3] | (RefSeq) histidine kinase 3
73	PGSC0003DMG401008870	40.4184	19.4796	21.426	14.8855	20.7293	1061.07	3006.06	-1.5024	1.5947e-06	2.8347e-05	DOWN	1352.02	1029.23	0.39355	0.33694	0.69478	FALSE	1426.62	3166.3	-1.1502	4.6714e-06	0.00011911	DOWN	1354.2	3166.99	-1.2257	1.9445e-07	2.0262e-06	DOWN	1380	1253.28	0.13896	0.57513	0.82662	FALSE	1430.59	2931.52	-1.035	0.00011014	0.0019808	DOWN	GO:0007165//GO:0065007//GO:0050794//GO:0050896//GO:0007154//GO:0051716//GO:0009987//GO:0008150//GO:0050789//GO:0023052	signal transduction//biological regulation//regulation of cellular process//response to stimulus//cell communication//cellular response to stimulus//cellular process//biological_process//regulation of biological process//signaling	--	--	--	--	no KO assigned | (RefSeq) rho GTPase-activating protein 5-like
74	PGSC0003DMG401018219	11.1816	2.98059	5.00455	4.35327	4.79135	225.523	598.981	-1.4092	4.7106e-05	0.0005616	DOWN	225.801	218.349	0.048419	0.92715	1	FALSE	238.356	631.398	-1.4054	6.1823e-06	0.00015144	DOWN	148.539	631.602	-2.0882	6.4772e-13	1.9522e-11	DOWN	231.65	137.54	0.7521	0.036749	0.13007	FALSE	240.245	584.328	-1.2823	5.3191e-05	0.0010863	DOWN	GO:0009607//GO:0008150//GO:0051707//GO:0009620//GO:0050832//GO:0043207//GO:0098542//GO:0050896//GO:0006952//GO:0051704//GO:0009605//GO:0006950	response to biotic stimulus//biological_process//response to other organism//response to fungus//defense response to fungus//response to external biotic stimulus//defense response to other organism//response to stimulus//defense response//multi-organism process//response to external stimulus//response to stress	--	--	GO:0050662//GO:0003824//GO:0003674//GO:0048037//GO:0005488	coenzyme binding//catalytic activity//molecular_function//cofactor binding//binding	no KO assigned | (RefSeq) protein EMSY-LIKE 3-like
75	PGSC0003DMG401027913	3.88844	0.347514	1.57153	1.50824	1.19936	60.076	160.999	-1.4222	0.0016724	0.011317	DOWN	43.9447	58.2179	-0.40577	0.49017	0.83584	FALSE	46.361	169.673	-1.8718	8.7199e-05	0.0013763	DOWN	13.4366	169.727	-3.659	7.3381e-15	2.9008e-13	DOWN	55.7279	12.4209	2.1656	0.0018602	0.012597	UP	57.8271	157.041	-1.4413	0.0021843	0.021159	DOWN	GO:0044237//GO:0051716//GO:0006289//GO:0006974//GO:0006950//GO:0044271//GO:1901360//GO:0006139//GO:0043170//GO:0009059//GO:0018130//GO:0050896//GO:0034654//GO:0016070//GO:0034641//GO:0032774//GO:0006259//GO:0046483//GO:0044238//GO:0090304//GO:0010467//GO:0009058//GO:0006807//GO:0008152//GO:0097659//GO:0071704//GO:0006351//GO:0034645//GO:0006725//GO:0044260//GO:1901576//GO:0019438//GO:0044249//GO:…	cellular metabolic process//cellular response to stimulus//nucleotide-excision repair//cellular response to DNA damage stimulus//response to stress//cellular nitrogen compound biosynthetic process//organic cyclic compound metabolic process//nucleobase-containing compound metabolic process//macromolecule metabolic process//macromolecule biosynthetic process//heterocycle biosynthetic process//respo…	GO:0044424//GO:0044428//GO:0043229//GO:0044446//GO:0044422//GO:0005623//GO:0000439//GO:0044464//GO:0005634//GO:0005622//GO:0032991//GO:0043227//GO:0043231//GO:0005575//GO:0043226	intracellular part//nuclear part//intracellular organelle//intracellular organelle part//organelle part//cell//core TFIIH complex//cell part//nucleus//intracellular//protein-containing complex//membrane-bounded organelle//intracellular membrane-bounded organelle//cellular_component//organelle	--	--	K03142 transcription initiation factor TFIIH subunit 2 | (RefSeq) GTF2H2; general transcription factor IIH subunit 2-like
76	PGSC0003DMG402001494	725.244	2057.2	5041.7	6386.6	3346.64	132149	15331.2	3.1076	6.066e-20	8.2489e-18	UP	63016.1	127820	-1.0203	0.00030015	0.0040292	DOWN	66537	16150.9	2.0425	9.8667e-08	4.2645e-06	UP	40567.9	16161	1.3278	0.0030054	0.010578	UP	93005.3	37603.2	1.3065	0.0053578	0.029317	UP	96359.1	14946	2.6887	7.0632e-07	2.6932e-05	UP	GO:0008150//GO:0009607//GO:0006952//GO:0050896//GO:0006950	biological_process//response to biotic stimulus//defense response//response to stimulus//response to stress	--	--	--	--	no KO assigned | (RefSeq) pathogenesis-related protein STH-2-like
77	PGSC0003DMG402019457	135.361	5.63382	49.9629	10.2628	45.6714	532.773	7411.66	-3.7982	9.5157e-30	3.6332e-27	DOWN	2193.76	518.186	2.0819	0.0019696	0.019048	UP	2321.44	7793.94	-1.7473	6.3897e-11	6.067e-09	DOWN	289.059	7792.63	-4.7527	4.3994e-59	4.6646e-56	DOWN	2350.09	268.176	3.1315	1.2985e-06	2.7933e-05	UP	2441.96	7223.94	-1.5647	1.4824e-08	8.573e-07	DOWN	GO:0009987//GO:0051171//GO:1901362//GO:0080090//GO:0023052//GO:0019438//GO:0050789//GO:0044249//GO:0031323//GO:0009889//GO:2000112//GO:0042221//GO:0031326//GO:0008150//GO:0006355//GO:0071704//GO:0097659//GO:0034645//GO:0006351//GO:0006725//GO:0071310//GO:1901576//GO:0009755//GO:0044260//GO:2001141//GO:0008152//GO:0051252//GO:1903506//GO:0009733//GO:0044238//GO:0046483//GO:0007165//GO:0090304//GO:…	cellular process//regulation of nitrogen compound metabolic process//organic cyclic compound biosynthetic process//regulation of primary metabolic process//signaling//aromatic compound biosynthetic process//regulation of biological process//cellular biosynthetic process//regulation of cellular metabolic process//regulation of biosynthetic process//regulation of cellular macromolecule biosynthetic…	GO:0043226//GO:0043227//GO:0043231//GO:0005575//GO:0044464//GO:0005634//GO:0005622//GO:0005623//GO:0043229//GO:0044424	organelle//membrane-bounded organelle//intracellular membrane-bounded organelle//cellular_component//cell part//nucleus//intracellular//cell//intracellular organelle//intracellular part	--	--	K14484 auxin-responsive protein IAA | (RefSeq) IAA3; auxin/indole-3-acetic acid 3
78	PGSC0003DMG402022215	13.5742	1.10611	0.917791	1.5528	0.735918	187.487	1727.4	-3.2037	0.0065628	0.034109	DOWN	80.7464	181.461	-1.1682	0.0093306	0.064365	FALSE	85.2466	1829.3	-4.4235	0.00099596	0.009757	DOWN	128.166	1828.64	-3.8347	0.0025862	0.00931	DOWN	97.5574	118.625	-0.28208	0.58979	0.8369	FALSE	101.138	1690.9	-4.0634	0.0020807	0.020449	DOWN	GO:0009605//GO:0044237//GO:0046686//GO:0006950//GO:0031667//GO:0006101//GO:1990641//GO:0050896//GO:0019752//GO:0042594//GO:0043436//GO:0009991//GO:0008152//GO:0006102//GO:0072350//GO:0071704//GO:0008150//GO:0042221//GO:0010038//GO:0006979//GO:0010035//GO:0006082//GO:0009987//GO:0044281	response to external stimulus//cellular metabolic process//response to cadmium ion//response to stress//response to nutrient levels//citrate metabolic process//response to iron ion starvation//response to stimulus//carboxylic acid metabolic process//response to starvation//oxoacid metabolic process//response to extracellular stimulus//metabolic process//isocitrate metabolic process//tricarboxylic…	GO:0044424//GO:0043229//GO:0005623//GO:0044444//GO:0005622//GO:0044464//GO:0005737//GO:0009507//GO:0005575//GO:0043231//GO:0005739//GO:0043227//GO:0009536//GO:0043226	intracellular part//intracellular organelle//cell//cytoplasmic part//intracellular//cell part//cytoplasm//chloroplast//cellular_component//intracellular membrane-bounded organelle//mitochondrion//membrane-bounded organelle//plastid//organelle	GO:0005488//GO:0051540//GO:0046872//GO:0016835//GO:0051539//GO:0003994//GO:0046914//GO:0051536//GO:0043169//GO:0016829//GO:0003674//GO:0005507//GO:0043167//GO:0003824//GO:0016836	binding//metal cluster binding//metal ion binding//carbon-oxygen lyase activity//4 iron, 4 sulfur cluster binding//aconitate hydratase activity//transition metal ion binding//iron-sulfur cluster binding//cation binding//lyase activity//molecular_function//copper ion binding//ion binding//catalytic activity//hydro-lyase activity	K01681 aconitate hydratase [EC:4.2.1.3] | (RefSeq) putative aconitate hydratase, cytoplasmic
79	PGSC0003DMG402027501	6.56776	1.14407	1.57684	3.23381	1.96693	269.233	568.933	-1.0794	0.0095298	0.045591	DOWN	149.436	261.421	-0.80685	0.30961	0.66393	FALSE	158.34	598.173	-1.9175	5.9112e-09	3.5289e-07	DOWN	93.3214	598.204	-2.6804	7.0542e-19	5.0831e-17	DOWN	117.751	86.4589	0.44565	0.25784	0.50846	FALSE	122.281	554.338	-2.1806	3.5611e-10	3.1027e-08	DOWN	GO:0006857//GO:0071702//GO:0051234//GO:0006810//GO:0042221//GO:0008150//GO:0071705//GO:0001101//GO:0042886//GO:0009719//GO:0006950//GO:0009725//GO:0010033//GO:0009753//GO:0015833//GO:0050896//GO:1901700//GO:0051179//GO:0009611	oligopeptide transport//organic substance transport//establishment of localization//transport//response to chemical//biological_process//nitrogen compound transport//response to acid chemical//amide transport//response to endogenous stimulus//response to stress//response to hormone//response to organic substance//response to jasmonic acid//peptide transport//response to stimulus//response to oxyg…	GO:0005575//GO:0016020//GO:0044425//GO:0016021//GO:0031224	cellular_component//membrane//membrane part//integral component of membrane//intrinsic component of membrane	GO:0003674//GO:0005215	molecular_function//transporter activity	K14638 solute carrier family 15 (peptide/histidine transporter), member 3/4 | (RefSeq) protein NRT1/ PTR FAMILY 6.2-like
80	PGSC0003DMG402029142	1.99761	10.3449	4.74334	6.31007	4.76938	407.915	130.782	1.6411	0.00014789	0.0015006	UP	277.827	394.762	-0.50679	0.1673	0.47194	FALSE	293.212	137.466	1.0929	0.0036412	0.026731	UP	638.97	137.563	2.2157	4.4236e-14	1.5579e-12	UP	269.144	591.69	-1.1365	6.4229e-05	0.00077276	DOWN	279.384	127.319	1.1338	0.0027186	0.024995	UP	GO:0071433//GO:0048856//GO:0009605//GO:0006950//GO:0051704//GO:0022622//GO:0032501//GO:0006952//GO:0050896//GO:0071840//GO:0045229//GO:0071555//GO:0098542//GO:0048513//GO:0007275//GO:0016043//GO:0071554//GO:0042742//GO:0009620//GO:0050832//GO:0043207//GO:0051707//GO:0048364//GO:0048731//GO:0008150//GO:0009617//GO:0009607//GO:0032502//GO:0009987	cell wall repair//anatomical structure development//response to external stimulus//response to stress//multi-organism process//root system development//multicellular organismal process//defense response//response to stimulus//cellular component organization or biogenesis//external encapsulating structure organization//cell wall organization//defense response to other organism//animal organ develo…	GO:0044424//GO:0043229//GO:0044444//GO:0005623//GO:0005622//GO:0044464//GO:0005737//GO:0043231//GO:0005575//GO:0005739//GO:0043227//GO:0043226	intracellular part//intracellular organelle//cytoplasmic part//cell//intracellular//cell part//cytoplasm//intracellular membrane-bounded organelle//cellular_component//mitochondrion//membrane-bounded organelle//organelle	--	--	no KO assigned | (RefSeq) uncharacterized LOC102590046
81	PGSC0003DMG403001309	51.3904	26.0949	27.5215	21.9512	24.8604	2552.67	6167.34	-1.2726	2.7227e-05	0.00034711	DOWN	2646.2	2472.46	0.097975	0.79276	1	FALSE	2792.22	6495.04	-1.2179	3.6494e-07	1.3135e-05	DOWN	2930.08	6495.79	-1.1486	5.63e-07	5.3315e-06	DOWN	2846.77	2711.14	0.070423	0.72183	0.92755	FALSE	2953.14	6014.51	-1.0262	0.00010505	0.0019077	DOWN	GO:0016311//GO:0044237//GO:0008150//GO:0006796//GO:0009987//GO:0006793//GO:0008152	dephosphorylation//cellular metabolic process//biological_process//phosphate-containing compound metabolic process//cellular process//phosphorus metabolic process//metabolic process	--	--	GO:0042578//GO:0003993//GO:0016788//GO:0003824//GO:0016787//GO:0003674//GO:0016791	phosphoric ester hydrolase activity//acid phosphatase activity//hydrolase activity, acting on ester bonds//catalytic activity//hydrolase activity//molecular_function//phosphatase activity	K13024 inositol-hexakisphosphate/diphosphoinositol-pentakisphosphate 1-kinase [EC:2.7.4.24] | (RefSeq) inositol hexakisphosphate and diphosphoinositol-pentakisphosphate kinase 2
82	PGSC0003DMG401008889	0.422621	2.33044	4.4873	3.38117	2.53807	124.696	16.1761	2.9465	0.00026631	0.00246	UP	84.6378	120.451	-0.50907	0.32787	0.68414	FALSE	89.2622	17.121	2.3823	0.00022629	0.0029683	UP	81.1655	17.0888	2.2478	0.0011451	0.0046152	UP	146.313	75.2426	0.95943	0.064431	0.19607	FALSE	151.513	15.8548	3.2564	1.0023e-06	3.587e-05	UP	--	--	GO:0016020//GO:0005575//GO:0016021//GO:0044425//GO:0031224	membrane//cellular_component//integral component of membrane//membrane part//intrinsic component of membrane	--	--	no KO assigned | (RefSeq) uncharacterized LOC102605139
83	PGSC0003DMG400028869	96.7164	38.3985	44.1081	47.7024	41.8705	6002.86	12623	-1.0723	0.0017052	0.011487	DOWN	4779.13	5808.99	-0.28154	0.31524	0.67	FALSE	5042.69	13326.4	-1.402	0.00020578	0.0027429	DOWN	4630.84	13327.4	-1.525	7.7991e-05	0.00043803	DOWN	4912.55	4286.74	0.19659	0.35753	0.62455	FALSE	5094.36	12328.4	-1.275	0.00050697	0.0067454	DOWN	GO:0043170//GO:0019538//GO:0044238//GO:0071704//GO:0006508//GO:0008152//GO:0008150	macromolecule metabolic process//protein metabolic process//primary metabolic process//organic substance metabolic process//proteolysis//metabolic process//biological_process	--	--	GO:0008233//GO:0008238//GO:0070008//GO:0003674//GO:0008236//GO:0016787//GO:0004175//GO:0004252//GO:0070011//GO:0017171//GO:0003824	peptidase activity//exopeptidase activity//serine-type exopeptidase activity//molecular_function//serine-type peptidase activity//hydrolase activity//endopeptidase activity//serine-type endopeptidase activity//peptidase activity, acting on L-amino acid peptides//serine hydrolase activity//catalytic activity	K01322 prolyl oligopeptidase [EC:3.4.21.26] | (RefSeq) prolyl endopeptidase-like
84	PGSC0003DMG400029571	76.7042	6.78695	38.4185	27.3057	23.5832	858.79	2516.39	-1.551	4.8892e-05	0.00058102	DOWN	688.938	831.955	-0.27213	0.43823	0.79046	FALSE	727.394	2655.8	-1.8683	2.1229e-05	0.000427	DOWN	205.909	2657.69	-3.6901	1.7827e-12	4.9696e-11	DOWN	1074.47	190.747	2.4939	6.2118e-20	2.3462e-17	UP	1114.71	2455.57	-1.1394	0.0012158	0.013528	DOWN	GO:0043043//GO:0044271//GO:1901360//GO:0006139//GO:0044237//GO:0009059//GO:0006399//GO:0043170//GO:0006435//GO:0016070//GO:0034641//GO:0019752//GO:0044267//GO:0009058//GO:0019538//GO:0006807//GO:0043603//GO:0010467//GO:0006412//GO:0090304//GO:0006418//GO:0046483//GO:0044238//GO:0043436//GO:0008152//GO:0043604//GO:0006520//GO:0044260//GO:1901576//GO:0006725//GO:0071704//GO:0006518//GO:0034645//GO:…	peptide biosynthetic process//cellular nitrogen compound biosynthetic process//organic cyclic compound metabolic process//nucleobase-containing compound metabolic process//cellular metabolic process//macromolecule biosynthetic process//tRNA metabolic process//macromolecule metabolic process//threonyl-tRNA aminoacylation//RNA metabolic process//cellular nitrogen compound metabolic process//carboxy…	GO:0044424//GO:0005623//GO:0005622//GO:0044464//GO:0005737//GO:0005575	intracellular part//cell//intracellular//cell part//cytoplasm//cellular_component	GO:0032559//GO:0032549//GO:0005488//GO:0043168//GO:0016874//GO:0017076//GO:1901265//GO:0016875//GO:0097367//GO:0001882//GO:0001883//GO:0000166//GO:0032550//GO:0032555//GO:0035639//GO:0005524//GO:0032553//GO:0036094//GO:0003674//GO:0043167//GO:0004812//GO:0030554//GO:0003824//GO:1901363//GO:0004829//GO:0097159	adenyl ribonucleotide binding//ribonucleoside binding//binding//anion binding//ligase activity//purine nucleotide binding//nucleoside phosphate binding//ligase activity, forming carbon-oxygen bonds//carbohydrate derivative binding//nucleoside binding//purine nucleoside binding//nucleotide binding//purine ribonucleoside binding//purine ribonucleotide binding//purine ribonucleoside triphosphate bin…	K01868 threonyl-tRNA synthetase [EC:6.1.1.3] | (RefSeq) threonine--tRNA ligase, mitochondrial 1-like
85	PGSC0003DMG400030038	0.198719	1.81094	1.02133	0.858121	1.2026	73.7375	17.8568	2.0459	0.00081853	0.0062843	UP	92.8844	71.4812	0.37787	0.42883	0.78205	FALSE	98.2317	18.8496	2.3817	0.00052587	0.0058318	UP	150.29	18.8814	2.9927	8.0907e-11	1.6774e-09	UP	78.3232	139.305	-0.83073	0.037914	0.13308	FALSE	81.3498	17.409	2.2243	0.00063898	0.0081841	UP	GO:0009987//GO:0006796//GO:0008150//GO:0008152//GO:0006793//GO:0016311//GO:0044237	cellular process//phosphate-containing compound metabolic process//biological_process//metabolic process//phosphorus metabolic process//dephosphorylation//cellular metabolic process	--	--	GO:0003824//GO:0016788//GO:0003674//GO:0016791//GO:0016787//GO:0042578//GO:0003993	catalytic activity//hydrolase activity, acting on ester bonds//molecular_function//phosphatase activity//hydrolase activity//phosphoric ester hydrolase activity//acid phosphatase activity	K03103 multiple inositol-polyphosphate phosphatase / 2,3-bisphosphoglycerate 3-phosphatase [EC:3.1.3.62 3.1.3.80] | (RefSeq) multiple inositol polyphosphate phosphatase 1-like
86	PGSC0003DMG400030432	0.870624	11.9907	8.87372	7.55308	8.38937	367.65	43.5358	3.0781	9.788e-14	6.4348e-12	UP	365.913	356.019	0.039545	0.83248	1	FALSE	386.73	45.8524	3.0763	9.2954e-09	5.3671e-07	UP	560.27	45.8882	3.6099	1.0499e-11	2.5676e-10	UP	379.87	519.177	-0.45072	0.24871	0.49708	FALSE	394.581	42.4289	3.2172	6.9779e-10	5.6692e-08	UP	GO:0034641//GO:0065007//GO:0006259//GO:0050794//GO:0010556//GO:0060255//GO:0009058//GO:0006807//GO:0046483//GO:0044238//GO:0090304//GO:0006139//GO:1901360//GO:0044237//GO:0009059//GO:0019219//GO:0043170//GO:0019222//GO:0031323//GO:0044249//GO:0050789//GO:0009889//GO:2000112//GO:0031326//GO:0008150//GO:0051052//GO:0006260//GO:0051171//GO:0009987//GO:0006275//GO:0080090//GO:0008152//GO:1901576//GO:…	cellular nitrogen compound metabolic process//biological regulation//DNA metabolic process//regulation of cellular process//regulation of macromolecule biosynthetic process//regulation of macromolecule metabolic process//biosynthetic process//nitrogen compound metabolic process//heterocycle metabolic process//primary metabolic process//nucleic acid metabolic process//nucleobase-containing compoun…	GO:0005623//GO:0005634//GO:0005622//GO:0044464//GO:0044424//GO:0043229//GO:0043226//GO:0043231//GO:0005575//GO:0043227	cell//nucleus//intracellular//cell part//intracellular part//intracellular organelle//organelle//intracellular membrane-bounded organelle//cellular_component//membrane-bounded organelle	GO:0030337//GO:0003677//GO:0005488//GO:0098772//GO:1901363//GO:0003676//GO:0097159//GO:0030234//GO:0003674	DNA polymerase processivity factor activity//DNA binding//binding//molecular function regulator//heterocyclic compound binding//nucleic acid binding//organic cyclic compound binding//enzyme regulator activity//molecular_function	K04802 proliferating cell nuclear antigen | (RefSeq) proliferating cell nuclear antigen
87	PGSC0003DMG400033649	2.59724	29.3289	9.94649	9.67466	9.95308	516.566	139.099	1.8928	6.364e-07	1.2534e-05	UP	473.474	499.599	-0.077485	0.90858	1	FALSE	500.477	145.987	1.7775	1.4118e-05	0.00030597	UP	1490.17	145.977	3.3517	7.6036e-31	1.7898e-28	UP	469.666	1381.03	-1.556	4.0841e-10	2.2778e-08	DOWN	486.955	135.407	1.8465	1.8403e-07	8.1899e-06	UP	--	--	--	--	GO:0003824//GO:0016787//GO:0003674	catalytic activity//hydrolase activity//molecular_function	K06130 lysophospholipase II [EC:3.1.1.5] | (RefSeq) acyl-protein thioesterase 1 homolog 1-like
88	PGSC0003DMG400044826	5.37125	15.0471	18.2324	17.626	22.4336	597.894	184.474	1.6965	6.7475e-06	0.00010347	UP	684.266	579.335	0.24016	0.48154	0.82849	FALSE	723.683	193.474	1.9032	0.00056377	0.0061719	UP	493.234	193.458	1.3503	5.8438e-06	4.3125e-05	UP	546.54	456.369	0.26013	0.42409	0.69393	FALSE	567.866	179.507	1.6615	0.0017061	0.017572	UP	GO:0008152//GO:0008150//GO:0055114	metabolic process//biological_process//oxidation-reduction process	--	--	GO:0003674//GO:0016491//GO:0003824	molecular_function//oxidoreductase activity//catalytic activity	no KO assigned | (RefSeq) short-chain dehydrogenase reductase 3b-like
89	PGSC0003DMG401002262	14.3954	2.66275	4.87646	4.78291	4.19914	964.289	3037.67	-1.6554	0.0033299	0.019735	DOWN	775.848	933.516	-0.2669	0.35637	0.71474	FALSE	819.526	3210.7	-1.97	0.0012654	0.01179	DOWN	514.954	3211.41	-2.6407	8.9401e-05	0.00049279	DOWN	876.056	477.321	0.87606	0.00082382	0.0065341	FALSE	908.121	2968.33	-1.7087	0.0030716	0.027462	DOWN	GO:0051179//GO:0051234//GO:0006810//GO:0008150	localization//establishment of localization//transport//biological_process	GO:0016021//GO:0044425//GO:0031224//GO:0016020//GO:0005575	integral component of membrane//membrane part//intrinsic component of membrane//membrane//cellular_component	GO:0097367//GO:1901265//GO:0017076//GO:0043168//GO:0005488//GO:0016817//GO:0032549//GO:0032559//GO:0017111//GO:0000166//GO:0016887//GO:0001883//GO:0001882//GO:0043167//GO:0003674//GO:0016818//GO:0036094//GO:0032553//GO:0005524//GO:0035639//GO:0032555//GO:0016787//GO:0032550//GO:0016462//GO:0097159//GO:1901363//GO:0003824//GO:0030554	carbohydrate derivative binding//nucleoside phosphate binding//purine nucleotide binding//anion binding//binding//hydrolase activity, acting on acid anhydrides//ribonucleoside binding//adenyl ribonucleotide binding//nucleoside-triphosphatase activity//nucleotide binding//ATPase activity//purine nucleoside binding//nucleoside binding//ion binding//molecular_function//hydrolase activity, acting on …	no KO assigned | (RefSeq) pleiotropic drug resistance protein 1-like
90	PGSC0003DMG400000027	2.60947	0.42094	0.498045	0.351375	0.670753	13.9283	105.609	-2.9226	4.9996e-07	1.0108e-05	DOWN	24.1797	13.4828	0.84268	0.40881	0.76395	FALSE	25.4615	111.111	-2.1256	0.00022728	0.0029763	DOWN	16.0179	111.11	-2.7942	4.1579e-08	5.0261e-07	DOWN	17.515	14.8109	0.24193	0.85055	0.99571	FALSE	18.181	102.945	-2.5014	2.7116e-05	0.00062051	DOWN	--	--	--	--	GO:0003674//GO:0097159//GO:0005488//GO:1901363//GO:0003676//GO:0003677	molecular_function//organic cyclic compound binding//binding//heterocyclic compound binding//nucleic acid binding//DNA binding	K09422 myb proto-oncogene protein, plant | (RefSeq) myb-related protein Zm38-like
91	PGSC0003DMG400000931	0.0733178	1.46838	0.999886	3.08725	0.770841	256.104	6.25251	5.3562	0.0016047	0.010943	UP	56.0994	247.488	-2.1413	0.086614	0.31532	FALSE	59.2846	6.61084	3.1648	0.0001683	0.0023434	UP	114.973	6.6177	4.1188	4.3216e-13	1.3337e-11	UP	71.7777	106.443	-0.56847	0.22763	0.46952	FALSE	74.5053	6.10569	3.6091	1.5758e-06	5.2207e-05	UP	--	--	GO:0005575//GO:0016021//GO:0016020//GO:0044425//GO:0031224	cellular_component//integral component of membrane//membrane//membrane part//intrinsic component of membrane	--	--	no KO assigned | (RefSeq) xyloglucan galactosyltransferase KATAMARI1 homolog
92	PGSC0003DMG400002810	40.8794	19.876	13.5132	11.9856	18.8352	1158.75	4125.16	-1.8319	4.9103e-09	1.4816e-07	DOWN	1682.94	1123.1	0.5835	0.084298	0.30993	FALSE	1776.69	4350.56	-1.292	8.0345e-07	2.6177e-05	DOWN	1864.24	4350.33	-1.2225	7.6802e-06	5.5168e-05	DOWN	1174.04	1724.06	-0.55433	0.056363	0.17759	FALSE	1217.36	4027.01	-1.726	2.0853e-10	1.9802e-08	DOWN	GO:0008152//GO:0044237//GO:0006139//GO:1901360//GO:0006725//GO:0043170//GO:0071704//GO:0008150//GO:0034641//GO:0090304//GO:0009987//GO:0044238//GO:0046483//GO:0090305//GO:0006807	metabolic process//cellular metabolic process//nucleobase-containing compound metabolic process//organic cyclic compound metabolic process//cellular aromatic compound metabolic process//macromolecule metabolic process//organic substance metabolic process//biological_process//cellular nitrogen compound metabolic process//nucleic acid metabolic process//cellular process//primary metabolic process//…	--	--	GO:0016787//GO:0005488//GO:0004527//GO:0003674//GO:0003824//GO:1901363//GO:0003676//GO:0016788//GO:0097159//GO:0008408//GO:0004518	hydrolase activity//binding//exonuclease activity//molecular_function//catalytic activity//heterocyclic compound binding//nucleic acid binding//hydrolase activity, acting on ester bonds//organic cyclic compound binding//3'-5' exonuclease activity//nuclease activity	no KO assigned | (RefSeq) uncharacterized LOC102598801
93	PGSC0003DMG400003266	2.70415	8.67963	7.22511	6.10593	10.5653	409.939	186.809	1.1338	0.0014037	0.0098041	UP	647.637	397.03	0.70594	0.03666	0.17616	FALSE	683.089	196.675	1.7963	1.0877e-08	6.2086e-07	UP	561.176	196.635	1.5129	1.0417e-07	1.1518e-06	UP	431.352	519.554	-0.26841	0.33813	0.60385	FALSE	447.326	182.21	1.2957	0.00011975	0.0021089	UP	GO:0008150//GO:0032259//GO:0008152	biological_process//methylation//metabolic process	GO:0044444//GO:0005623//GO:0009536//GO:0043226//GO:0044464//GO:0005622//GO:0009507//GO:0005737//GO:0044424//GO:0043227//GO:0043231//GO:0005575//GO:0043229	cytoplasmic part//cell//plastid//organelle//cell part//intracellular//chloroplast//cytoplasm//intracellular part//membrane-bounded organelle//intracellular membrane-bounded organelle//cellular_component//intracellular organelle	GO:0003824//GO:0016740//GO:0016741//GO:0008168//GO:0003674	catalytic activity//transferase activity//transferase activity, transferring one-carbon groups//methyltransferase activity//molecular_function	no KO assigned | (RefSeq) uncharacterized LOC102599007
94	PGSC0003DMG400005744	43.545	20.2272	12.7585	21.4153	16.6022	729.599	1523.02	-1.0618	0.00068135	0.0053895	DOWN	510.393	705.897	-0.46785	0.15671	0.45439	FALSE	538.959	1605.12	-1.5744	6.3669e-09	3.7634e-07	DOWN	658.334	1604.83	-1.2855	2.5254e-07	2.5729e-06	DOWN	384.807	609.658	-0.66387	0.013741	0.061247	FALSE	398.87	1486.38	-1.8978	1.2301e-10	1.2349e-08	DOWN	--	--	--	--	GO:0043168//GO:0003924//GO:0032553//GO:0032555//GO:0005488//GO:0035639//GO:0032550//GO:0016787//GO:0032549//GO:0016817//GO:0097367//GO:1901265//GO:0043167//GO:0017076//GO:0036094//GO:0016818//GO:0003674//GO:1901363//GO:0000166//GO:0001883//GO:0003824//GO:0005525//GO:0019001//GO:0001882//GO:0032561//GO:0016462//GO:0097159//GO:0017111	anion binding//GTPase activity//ribonucleotide binding//purine ribonucleotide binding//binding//purine ribonucleoside triphosphate binding//purine ribonucleoside binding//hydrolase activity//ribonucleoside binding//hydrolase activity, acting on acid anhydrides//carbohydrate derivative binding//nucleoside phosphate binding//ion binding//purine nucleotide binding//small molecule binding//hydrolase …	no KO assigned | (RefSeq) ras-related protein RABA6a-like
95	PGSC0003DMG400019644	0.0807511	4.41019	2.95059	2.00799	2.94997	140.513	5.83161	4.5907	7.0175e-07	1.3633e-05	UP	189.918	136.337	0.4782	0.27197	0.61954	FALSE	200.357	6.12724	5.0312	1.8454e-17	5.4647e-15	UP	300.452	6.12246	5.6169	1.9466e-25	2.7918e-23	UP	184.29	278.239	-0.59435	0.075591	0.21985	FALSE	191.439	5.68479	5.0736	1.4756e-14	3.0554e-12	UP	GO:0008152//GO:0008150	metabolic process//biological_process	--	--	GO:0003674//GO:0016757//GO:0016740//GO:0003824//GO:0016758	molecular_function//transferase activity, transferring glycosyl groups//transferase activity//catalytic activity//transferase activity, transferring hexosyl groups	no KO assigned | (RefSeq) UDP-glycosyltransferase 89A2-like
96	PGSC0003DMG400019963	9.43751	64.8881	32.4094	37.5966	33.425	2751.05	702.731	1.9689	4.5012e-10	1.6308e-08	UP	2229.18	2664.38	-0.25728	0.36422	0.72182	FALSE	2352.69	738.107	1.6724	2.0092e-10	1.7218e-08	UP	4578.57	737.746	2.6337	2.7469e-19	2.0856e-17	UP	2084.85	4235.17	-1.0225	0.00040728	0.003657	DOWN	2165.24	684.695	1.661	0.00046971	0.0063574	UP	--	--	--	--	GO:1901265//GO:0097367//GO:0017076//GO:0043168//GO:0032559//GO:0032549//GO:0005488//GO:0001883//GO:0000166//GO:0001882//GO:0043167//GO:0003674//GO:0036094//GO:0032553//GO:0005524//GO:0032550//GO:0035639//GO:0032555//GO:0097159//GO:0030554//GO:1901363	nucleoside phosphate binding//carbohydrate derivative binding//purine nucleotide binding//anion binding//adenyl ribonucleotide binding//ribonucleoside binding//binding//purine nucleoside binding//nucleotide binding//nucleoside binding//ion binding//molecular_function//small molecule binding//ribonucleotide binding//ATP binding//purine ribonucleoside binding//purine ribonucleoside triphosphate bin…	no KO assigned | (RefSeq) uncharacterized LOC102581738
97	PGSC0003DMG400022507	13.621	6.69089	7.05673	6.70476	6.45508	790.414	1663.55	-1.0736	0.00067307	0.005331	DOWN	689.497	765.207	-0.15031	0.63726	0.93591	FALSE	727.999	1754.7	-1.2692	1.9626e-06	5.71e-05	DOWN	756.077	1754.59	-1.2145	1.2678e-05	8.6426e-05	DOWN	735.474	701.042	0.069173	0.76828	0.95353	FALSE	763.206	1624.12	-1.0895	0.00015015	0.002548	DOWN	GO:0044237//GO:0043170//GO:0016310//GO:0006464//GO:0044267//GO:0044238//GO:0006468//GO:0036211//GO:0019538//GO:0008152//GO:0006793//GO:0071704//GO:0044260//GO:0043412//GO:0008150//GO:0009987//GO:0006796	cellular metabolic process//macromolecule metabolic process//phosphorylation//cellular protein modification process//cellular protein metabolic process//primary metabolic process//protein phosphorylation//protein modification process//protein metabolic process//metabolic process//phosphorus metabolic process//organic substance metabolic process//cellular macromolecule metabolic process//macromole…	--	--	GO:0043168//GO:0005488//GO:0032549//GO:0032559//GO:0097367//GO:1901265//GO:0017076//GO:0000166//GO:0001883//GO:0004672//GO:0001882//GO:0016772//GO:0004674//GO:0016773//GO:0016301//GO:0032553//GO:0005524//GO:0035639//GO:0032555//GO:0032550//GO:0043167//GO:0003674//GO:0036094//GO:1901363//GO:0003824//GO:0030554//GO:0016740//GO:0097159	anion binding//binding//ribonucleoside binding//adenyl ribonucleotide binding//carbohydrate derivative binding//nucleoside phosphate binding//purine nucleotide binding//nucleotide binding//purine nucleoside binding//protein kinase activity//nucleoside binding//transferase activity, transferring phosphorus-containing groups//protein serine/threonine kinase activity//phosphotransferase activity, al…	K08867 WNK lysine deficient protein kinase [EC:2.7.11.1] | (RefSeq) probable serine/threonine-protein kinase WNK9
98	PGSC0003DMG400006187	0.952545	2.81042	2.87035	2.68149	2.86174	128.356	45.1419	1.5076	0.0067655	0.034931	UP	121.942	124.075	-0.025015	0.98711	1	FALSE	128.854	47.2789	1.4465	0.0052905	0.035694	UP	127.778	47.2526	1.4352	0.0010124	0.004145	UP	120.404	118.275	0.025734	0.95481	1	FALSE	124.92	43.9132	1.5083	0.0035481	0.030658	UP	--	--	--	--	--	--	K19042 E3 ubiquitin-protein ligase BOI and related proteins [EC:2.3.2.27] | (RefSeq) probable BOI-related E3 ubiquitin-protein ligase 3
99	PGSC0003DMG400025752	69.4882	6.7215	10.1389	18.9183	11.1592	1304.92	4880.17	-1.903	4.7838e-10	1.7248e-08	DOWN	682.38	1261.89	-0.88694	0.020824	0.11651	FALSE	721.626	5138.21	-2.8319	6.2477e-18	1.9465e-15	DOWN	442.841	5141.64	-3.5374	2.7195e-24	3.48e-22	DOWN	607.302	409.467	0.56867	0.17501	0.39518	FALSE	630.867	4755.78	-2.9143	2.722e-19	1.2114e-16	DOWN	--	--	--	--	--	--	no KO assigned | (RefSeq) LOB domain-containing protein 37-like
100	PGSC0003DMG400026180	19.7125	46.8458	55.5908	49.7616	48.3396	5615.25	2282.79	1.2986	1.78e-05	0.00024096	UP	4974.28	5436.15	-0.1281	0.62083	0.92761	FALSE	5247.98	2403.56	1.1266	4.6316e-06	0.0001182	UP	5080.37	2404.3	1.0793	3.484e-06	2.732e-05	UP	5548.87	4701.88	0.23896	0.24389	0.4911	FALSE	5756.02	2225.49	1.3709	1.8041e-07	8.0769e-06	UP	--	--	--	--	--	--	no KO assigned | (RefSeq) uncharacterized LOC102597594
101	PGSC0003DMG400026493	6.59754	26.3983	23.153	24.0341	21.5363	3685.98	1047.44	1.8152	3.8546e-09	1.1822e-07	UP	3025.41	3567.51	-0.23779	0.37299	0.7302	FALSE	3191.79	1105.4	1.5298	0.00011873	0.0017624	UP	3874.15	1105.57	1.8091	1.7774e-14	6.555e-13	UP	3162.16	3589.09	-0.18271	0.34423	0.60989	FALSE	3278.24	1022.68	1.6806	9.8238e-10	7.668e-08	UP	--	--	--	--	--	--	no KO assigned | (RefSeq) DNA-binding protein SMUBP-2
102	PGSC0003DMG400001858	13.679	85.5553	87.1983	45.0169	69.9269	1868.4	573.479	1.704	6.9145e-06	0.00010571	UP	2626.35	1810.15	0.53695	0.060379	0.24812	FALSE	2774.18	601.322	2.2059	3.5593e-14	6.1892e-12	UP	3423.91	601.42	2.5092	1.8204e-23	2.1194e-21	UP	3199.02	3169.25	0.013487	0.93403	1	FALSE	3322.94	557.822	2.5746	2.0649e-07	9.081e-06	UP	--	--	--	--	--	--	no KO assigned | (RefSeq) uncharacterized LOC102583567
103	PGSC0003DMG400009096	4.64823	0.751798	2.12342	2.39041	1.37255	216.81	437.285	-1.0121	0.0044797	0.02511	DOWN	115.859	210.016	-0.85814	0.030373	0.15392	FALSE	122.169	461.004	-1.9159	1.9595e-08	1.0484e-06	DOWN	65.726	461.068	-2.8104	6.5423e-18	4.038e-16	DOWN	171.579	60.8752	1.4949	0.00028552	0.0027299	UP	178.011	426.7	-1.2613	0.00024668	0.0037816	DOWN	--	--	--	--	GO:0097159//GO:1901363//GO:0003676//GO:0003674//GO:0005515//GO:0046983//GO:0003677//GO:0005488	organic cyclic compound binding//heterocyclic compound binding//nucleic acid binding//molecular_function//protein binding//protein dimerization activity//DNA binding//binding	no KO assigned | (RefSeq) uncharacterized LOC102593027
104	PGSC0003DMG402026315	76.6351	24.9147	22.8101	20.3936	30.4213	2192.51	8507.51	-1.9562	2.005e-10	7.6552e-09	DOWN	2996.79	2122.41	0.49772	0.1075	0.36138	FALSE	3160.35	8968.58	-1.5048	3.1629e-10	2.5776e-08	DOWN	2574.59	8969.79	-1.8007	1.4567e-14	5.4312e-13	DOWN	2184.32	2382.74	-0.12544	0.59752	0.84133	FALSE	2263.28	8301.39	-1.8749	3.2838e-12	4.4506e-10	DOWN	--	--	--	--	--	--	no KO assigned | (RefSeq) E3 ubiquitin-protein ligase RLIM
105	Novel00025	4.32515	14.3324	21.5567	23.9655	21.7794	1323.34	241.997	2.4511	0.00064205	0.0051208	UP	1085.38	1278.46	-0.2362	0.60477	0.91747	FALSE	1146.01	254.834	2.169	9.3377e-11	8.5933e-09	UP	749.464	254.788	1.5566	0.011844	0.034136	UP	1050.03	694.633	0.5961	0.15097	0.35848	FALSE	1088	236.062	2.2044	6.3184e-10	5.1757e-08	UP	--	--	--	--	GO:0005515//GO:0005488//GO:0003674	protein binding//binding//molecular_function	no KO assigned | (RefSeq) receptor-like protein 12
106	Novel00074	7.35213	0.681476	3.39837	3.37048	2.21485	81.2408	184.951	-1.1869	0.0056527	0.030316	DOWN	49.7279	78.6902	-0.66213	0.21441	0.54394	FALSE	52.4973	195.25	-1.895	0.00010157	0.0015603	DOWN	15.8892	195.391	-3.6202	3.5012e-10	6.5046e-09	DOWN	73.833	14.6909	2.3293	0.00035052	0.0032251	UP	76.4306	180.507	-1.2398	0.0047746	0.038425	DOWN	GO:0044237//GO:1901360//GO:0006139//GO:0043170//GO:0034655//GO:1901361//GO:0016070//GO:0034641//GO:0000184//GO:0046483//GO:0044238//GO:0090304//GO:0000956//GO:0006807//GO:1901575//GO:0016071//GO:0044265//GO:0008152//GO:0071704//GO:0006725//GO:0046700//GO:0044260//GO:0006402//GO:0019439//GO:0044270//GO:0006401//GO:0008150//GO:0009987//GO:0044248//GO:0009057//GO:0009056	cellular metabolic process//organic cyclic compound metabolic process//nucleobase-containing compound metabolic process//macromolecule metabolic process//nucleobase-containing compound catabolic process//organic cyclic compound catabolic process//RNA metabolic process//cellular nitrogen compound metabolic process//nuclear-transcribed mRNA catabolic process, nonsense-mediated decay//heterocycle me…	GO:0044424//GO:0005623//GO:0044464//GO:0005622//GO:0005737//GO:0005575	intracellular part//cell//cell part//intracellular//cytoplasm//cellular_component	GO:0043168//GO:0005488//GO:0032559//GO:0032549//GO:0016817//GO:0046872//GO:0097367//GO:1901265//GO:0017076//GO:0003677//GO:0000166//GO:0001883//GO:0001882//GO:0043169//GO:0046914//GO:0017111//GO:0005524//GO:0032553//GO:0032555//GO:0035639//GO:0032550//GO:0008270//GO:0016787//GO:0043167//GO:0036094//GO:0016818//GO:0003674//GO:1901363//GO:0003676//GO:0030554//GO:0003824//GO:0004386//GO:0016462//GO:…	anion binding//binding//adenyl ribonucleotide binding//ribonucleoside binding//hydrolase activity, acting on acid anhydrides//metal ion binding//carbohydrate derivative binding//nucleoside phosphate binding//purine nucleotide binding//DNA binding//nucleotide binding//purine nucleoside binding//nucleoside binding//cation binding//transition metal ion binding//nucleoside-triphosphatase activity//AT…	K14326 regulator of nonsense transcripts 1 [EC:3.6.4.-] | (RefSeq) regulator of nonsense transcripts 1 homolog
107	Novel00114	0.190079	4.21653	2.27436	7.67394	3.08666	647.174	16.3218	5.3093	1.9122e-30	7.4932e-28	UP	232.996	627.19	-1.4286	0.00070147	0.0081687	DOWN	246.858	17.1267	3.8494	0.00057061	0.0062309	UP	343.56	17.0936	4.329	5.7833e-28	1.0469e-25	UP	169.515	318.118	-0.90815	0.0053139	0.029133	FALSE	176.106	15.9181	3.4677	1.78e-08	1.011e-06	UP	--	--	--	--	GO:0005488//GO:0005515//GO:0003674	binding//protein binding//molecular_function	no KO assigned | (RefSeq) probable disease resistance protein At1g61310
108	Novel00115	0.216275	0.772457	3.50848	11.8016	1.37983	964.415	18.3798	5.7135	8.5046e-05	0.0009356	UP	104.353	936.717	-3.1661	0.0081378	0.057946	FALSE	110.549	19.3101	2.5173	0.0010692	0.010329	UP	61.9532	19.2982	1.6827	0.0037066	0.012694	UP	255.894	57.3661	2.1573	0.012434	0.0568	FALSE	266.16	17.9131	3.8932	0.00034361	0.0049227	UP	--	--	--	--	GO:0017076//GO:1901265//GO:0097367//GO:0032549//GO:0016817//GO:0032559//GO:0005488//GO:0043168//GO:0003924//GO:0017111//GO:0005515//GO:0032561//GO:0001882//GO:0001883//GO:0005525//GO:0000166//GO:0036094//GO:0016818//GO:0003674//GO:0043167//GO:0032550//GO:0016787//GO:0032555//GO:0035639//GO:0043531//GO:0005524//GO:0032553//GO:0097159//GO:0016462//GO:0019001//GO:0003824//GO:0030554//GO:1901363	purine nucleotide binding//nucleoside phosphate binding//carbohydrate derivative binding//ribonucleoside binding//hydrolase activity, acting on acid anhydrides//adenyl ribonucleotide binding//binding//anion binding//GTPase activity//nucleoside-triphosphatase activity//protein binding//guanyl ribonucleotide binding//nucleoside binding//purine nucleoside binding//GTP binding//nucleotide binding//sm…	no KO assigned | (RefSeq) probable disease resistance protein At4g27220
109	Novel00139	0.161327	0.64283	1.84358	0.967301	0.927022	91.8852	15.796	2.5403	0.0054172	0.029354	UP	81.2837	89.2008	-0.13409	0.78162	0.99972	FALSE	85.8626	16.5793	2.3726	0.00041611	0.0048502	UP	59.9559	16.5745	1.8549	0.0024091	0.0087649	UP	156.925	55.3935	1.5023	0.0019473	0.013063	UP	163.046	15.3809	3.4061	7.8114e-08	3.8498e-06	UP	--	--	--	--	--	--	--
110	Novel00254	12.8213	4.06466	4.90992	4.17541	6.9664	325.562	1018.73	-1.6458	4.5316e-07	9.3073e-06	DOWN	493.067	315.148	0.64576	0.063568	0.25715	FALSE	519.497	1071.35	-1.0442	0.00011639	0.0017401	DOWN	303.677	1070.96	-1.8183	4.2832e-12	1.1174e-10	DOWN	342.308	281.187	0.28376	0.41924	0.68907	FALSE	354.768	993.176	-1.4852	3.9172e-07	1.5913e-05	DOWN	--	--	--	--	GO:0016817//GO:0008233//GO:0016772//GO:0004197//GO:0017111//GO:0004175//GO:0016787//GO:0004252//GO:0003968//GO:0016779//GO:0003674//GO:0008234//GO:0034062//GO:0016818//GO:0008236//GO:0016740//GO:0017171//GO:0003824//GO:0016462//GO:0070011	hydrolase activity, acting on acid anhydrides//peptidase activity//transferase activity, transferring phosphorus-containing groups//cysteine-type endopeptidase activity//nucleoside-triphosphatase activity//endopeptidase activity//hydrolase activity//serine-type endopeptidase activity//RNA-directed 5'-3' RNA polymerase activity//nucleotidyltransferase activity//molecular_function//cysteine-type pe…	K03327 multidrug resistance protein, MATE family | (RefSeq) protein DETOXIFICATION 16-like
111	Novel00293	76.4442	18.1945	31.7531	10.2743	32.4557	792.48	6030.69	-2.9279	5.0651e-20	6.9514e-18	DOWN	2273.45	766.444	1.5686	1.5404e-06	4.0613e-05	UP	2401.24	6354.33	-1.404	6.29e-09	3.7327e-07	DOWN	1333.92	6354.63	-2.2521	8.7791e-21	7.8742e-19	DOWN	2154.62	1237.54	0.79996	0.00062782	0.0052473	FALSE	2235.1	5883.4	-1.3963	1.7777e-07	7.9709e-06	DOWN	GO:0008150//GO:0006508//GO:0008152//GO:0071704//GO:0019538//GO:0044238//GO:0043170	biological_process//proteolysis//metabolic process//organic substance metabolic process//protein metabolic process//primary metabolic process//macromolecule metabolic process	--	--	GO:0017171//GO:0003824//GO:0004180//GO:0070011//GO:0016787//GO:0003674//GO:0008236//GO:0004185//GO:0008238//GO:0070008//GO:0008233	serine hydrolase activity//catalytic activity//carboxypeptidase activity//peptidase activity, acting on L-amino acid peptides//hydrolase activity//molecular_function//serine-type peptidase activity//serine-type carboxypeptidase activity//exopeptidase activity//serine-type exopeptidase activity//peptidase activity	K16297 serine carboxypeptidase-like clade II [EC:3.4.16.-] | (RefSeq) serine carboxypeptidase-like 40
112	Novel00323	6.0469	1.06047	1.36587	1.6731	1.91988	85.8281	317.314	-1.8864	1.4009e-06	2.5254e-05	DOWN	89.0416	82.9299	0.10259	0.87031	1	FALSE	93.7763	334.825	-1.8361	1.0438e-06	3.2933e-05	DOWN	51.5667	334.837	-2.6989	3.054e-10	5.7604e-09	DOWN	62.8717	47.6601	0.39963	0.783	0.96031	FALSE	65.094	309.829	-2.2509	4.5558e-08	2.3768e-06	DOWN	--	--	--	--	--	--	--
113	Novel00324	3.3516	0.712401	0.549317	0.992761	1.21951	46.8371	159.577	-1.7685	9.8651e-05	0.0010614	DOWN	51.8313	45.2119	0.19712	0.77874	0.99905	FALSE	54.6077	168.156	-1.6226	0.00043747	0.0050344	DOWN	31.7595	168.183	-2.4048	1.2356e-08	1.6727e-07	DOWN	22.9602	29.2915	-0.35135	0.68489	0.90275	FALSE	23.7823	155.669	-2.7105	1.1591e-07	5.451e-06	DOWN	--	--	--	--	--	--	no KO assigned | (RefSeq) agamous-like MADS-box protein AGL62
114	Novel00411	36.2593	17.4313	18.6115	14.6757	18.2576	2618.51	6704.27	-1.3563	8.2937e-06	0.00012337	DOWN	2975.83	2536.07	0.2307	0.45737	0.80707	FALSE	3140.64	7068.23	-1.1703	1.1886e-06	3.687e-05	DOWN	2996.91	7069.06	-1.238	9.7092e-08	1.0824e-06	DOWN	2957.76	2774.62	0.092218	0.68552	0.90275	FALSE	3067.52	6542.3	-1.0927	3.589e-05	0.00078341	DOWN	--	--	--	--	GO:0008289//GO:0043167//GO:0003674//GO:0005543//GO:0035091//GO:0043168//GO:0005488	lipid binding//ion binding//molecular_function//phospholipid binding//phosphatidylinositol binding//anion binding//binding	K17925 sorting nexin-13 | (RefSeq) uncharacterized LOC102591656
115	Novel00447	17.3298	1.93419	7.6897	4.72752	6.32582	198.159	754.494	-1.9289	2.5156e-08	6.6593e-07	DOWN	247.142	192.112	0.36339	0.55271	0.8833	FALSE	261.042	794.457	-1.6057	4.6017e-08	2.2235e-06	DOWN	78.9889	794.933	-3.3311	2.1672e-27	3.7848e-25	DOWN	288.872	73.0729	1.983	1.9981e-08	7.0807e-07	UP	299.545	735.352	-1.2957	3.5062e-05	0.00076871	DOWN	GO:0006811//GO:0051179//GO:0006810//GO:0051234//GO:0008150	ion transport//localization//transport//establishment of localization//biological_process	GO:0016020//GO:0005575	membrane//cellular_component	GO:0015075//GO:0005215//GO:0022838//GO:0015267//GO:0005216//GO:0003674//GO:0022857//GO:0022803	ion transmembrane transporter activity//transporter activity//substrate-specific channel activity//channel activity//ion channel activity//molecular_function//transmembrane transporter activity//passive transmembrane transporter activity	no KO assigned | (RefSeq) protein indeterminate-domain 5, chloroplastic-like
116	Novel00467	9.57369	0.403482	4.57258	3.4355	2.27308	304.353	885.837	-1.5413	4.4521e-06	7.167e-05	DOWN	186.354	295.022	-0.66278	0.075511	0.28853	FALSE	196.986	934.348	-2.2459	1.7585e-13	2.7251e-11	DOWN	34.794	934.604	-4.7474	2.9447e-36	9.0125e-34	DOWN	361.627	32.1512	3.4916	1.6923e-20	7.013e-18	UP	375.3	864.519	-1.2039	7.8749e-05	0.0014956	DOWN	--	--	--	--	GO:0046872//GO:0005488//GO:0005544//GO:0043168//GO:0043169//GO:0005543//GO:0003674//GO:0043167//GO:0005509//GO:0008289	metal ion binding//binding//calcium-dependent phospholipid binding//anion binding//cation binding//phospholipid binding//molecular_function//ion binding//calcium ion binding//lipid binding	--
117	Novel00541	11.8393	4.7313	6.36607	5.27603	5.76895	855.56	1975.83	-1.2075	9.646e-05	0.0010431	DOWN	851.51	828.179	0.040081	0.91289	1	FALSE	899.11	2082.04	-1.2114	2.3425e-06	6.5561e-05	DOWN	735.507	2082.65	-1.5016	8.254e-10	1.4297e-08	DOWN	919.098	681.342	0.43184	0.092926	0.25513	FALSE	952.664	1927.16	-1.0164	0.0002093	0.0033195	DOWN	GO:0043170//GO:0009059//GO:0044237//GO:0006139//GO:1901360//GO:0044271//GO:0090304//GO:0007049//GO:0044238//GO:0046483//GO:0006807//GO:0009058//GO:0010467//GO:0034654//GO:0018130//GO:0032774//GO:0016070//GO:0034641//GO:0006725//GO:0071704//GO:0097659//GO:0034645//GO:0006351//GO:1901576//GO:0044260//GO:0008152//GO:1901362//GO:0009987//GO:0019438//GO:0008150//GO:0044249	macromolecule metabolic process//macromolecule biosynthetic process//cellular metabolic process//nucleobase-containing compound metabolic process//organic cyclic compound metabolic process//cellular nitrogen compound biosynthetic process//nucleic acid metabolic process//cell cycle//primary metabolic process//heterocycle metabolic process//nitrogen compound metabolic process//biosynthetic process/…	GO:0032991//GO:0005575//GO:0017053	protein-containing complex//cellular_component//transcriptional repressor complex	--	--	no KO assigned | (RefSeq) protein ALWAYS EARLY 3-like
118	Novel00591	3.30331	1.56306	0.905947	1.18809	0.870117	66.4098	191.444	-1.5275	0.001556	0.010689	DOWN	44.4972	64.4653	-0.53481	0.42039	0.77437	FALSE	46.9529	201.136	-2.0989	5.1666e-06	0.00012975	DOWN	85.5256	201.015	-1.2329	0.00052334	0.0023403	DOWN	45.8433	79.1961	-0.78872	0.13019	0.32415	FALSE	47.5192	186.582	-1.9732	1.8022e-05	0.0004337	DOWN	--	--	--	--	--	--	K10255 acyl-lipid omega-6 desaturase (Delta-12 desaturase) [EC:1.14.19.23 1.14.19.45] | (RefSeq) omega-6 fatty acid desaturase, chloroplastic
119	Novel00602	1.05936	0.0128096	0.0443887	0.141261	0.116387	11.3223	91.6108	-3.0164	3.562e-05	0.00043871	DOWN	9.1114	11.0094	-0.27299	0.78649	1	FALSE	9.60849	96.8125	-3.3328	7.4737e-06	0.00017797	DOWN	1.01528	96.8127	-6.5753	1.3208e-10	2.6423e-09	DOWN	3.22549	0.943133	1.774	0.62726	0.86497	FALSE	3.35848	89.5315	-4.7365	3.9297e-08	2.0702e-06	DOWN	GO:0055114//GO:0008150//GO:0008152	oxidation-reduction process//biological_process//metabolic process	--	--	GO:0043169//GO:0046914//GO:0020037//GO:0016705//GO:0046872//GO:0005488//GO:0097159//GO:0003824//GO:1901363//GO:0016491//GO:0043167//GO:0003674//GO:0046906//GO:0005506	cation binding//transition metal ion binding//heme binding//oxidoreductase activity, acting on paired donors, with incorporation or reduction of molecular oxygen//metal ion binding//binding//organic cyclic compound binding//catalytic activity//heterocyclic compound binding//oxidoreductase activity//ion binding//molecular_function//tetrapyrrole binding//iron ion binding	no KO assigned | (RefSeq) cytochrome P450 704C1-like
120	Novel00647	8.29621	4.5238	1.73156	2.00229	2.32384	189.11	811.505	-2.1014	1.2124e-09	4.0799e-08	DOWN	197.45	183.299	0.10728	0.74997	0.98879	FALSE	208.797	854.573	-2.0331	5.5717e-11	5.3583e-09	DOWN	413.134	854.202	-1.048	6.9566e-05	0.00039565	DOWN	146.087	382.613	-1.3891	9.526e-06	0.00015519	DOWN	151.599	791.829	-2.3849	3.3575e-13	5.4705e-11	DOWN	--	--	--	--	--	--	--
121	Novel00654	25.548	2.74869	12.1324	12.8927	7.8813	1749.04	3619.14	-1.0491	0.0076811	0.038549	DOWN	990.581	1693.69	-0.77383	0.013067	0.082589	FALSE	1045.6	3822.3	-1.8701	0.00017011	0.002357	DOWN	358.987	3822.82	-3.4126	4.1105e-09	6.1354e-08	DOWN	1464.48	332.421	2.1393	7.5378e-17	1.4326e-14	UP	1518.71	3535.24	-1.219	0.0031943	0.028347	DOWN	--	--	--	--	--	--	K17906 autophagy-related protein 2 | (RefSeq) autophagy-related protein 2
122	Novel00664	2.57302	6.07053	6.2298	5.48435	5.87816	325.592	156.919	1.053	0.0045475	0.025433	UP	317.064	315.1	0.0089644	0.98387	1	FALSE	334.705	165.38	1.0171	0.0039885	0.028808	UP	344.833	165.409	1.0599	0.00047912	0.0021673	UP	326.937	319.295	0.03412	0.89135	1	FALSE	339.025	153.088	1.147	0.0012012	0.013399	UP	GO:0006629//GO:0044238//GO:0008152//GO:0071704//GO:0008150	lipid metabolic process//primary metabolic process//metabolic process//organic substance metabolic process//biological_process	GO:0044424//GO:0044425//GO:0016021//GO:0005623//GO:0044464//GO:0031224//GO:0005622//GO:0005737//GO:0016020//GO:0005575	intracellular part//membrane part//integral component of membrane//cell//cell part//intrinsic component of membrane//intracellular//cytoplasm//membrane//cellular_component	GO:0016627//GO:0003674//GO:0003824//GO:0016491	oxidoreductase activity, acting on the CH-CH group of donors//molecular_function//catalytic activity//oxidoreductase activity	K12345 3-oxo-5-alpha-steroid 4-dehydrogenase 3 [EC:1.3.1.22 1.3.1.94] | (RefSeq) polyprenol reductase 2
123	Novel00681	1.7503	0.430508	0.286693	0.258637	0.261418	9.96574	69.1748	-2.7952	3.6882e-05	0.00045145	DOWN	9.36603	9.6597	-0.044539	0.992	1	FALSE	9.91005	72.7235	-2.8755	0.00012543	0.001839	DOWN	16.0069	72.6791	-2.1828	0.0001334	0.0007032	DOWN	9.77224	14.8309	-0.60185	0.64143	0.87553	FALSE	10.1331	67.444	-2.7346	0.00028251	0.0042064	DOWN	--	--	--	--	--	--	K14487 auxin responsive GH3 gene family | (RefSeq) indole-3-acetic acid-amido synthetase GH3.6-like
124	Novel00697	2.18894	0.327909	0.413291	0.221282	0.500066	7.35996	75.5407	-3.3595	1.3094e-06	2.3861e-05	DOWN	15.2329	7.13448	1.0943	0.41435	0.76883	FALSE	16.0787	79.5397	-2.3065	0.00079536	0.008132	DOWN	10.5789	79.541	-2.9105	1.0204e-06	9.149e-06	DOWN	12.3039	9.78938	0.32983	0.81574	0.97693	FALSE	12.7696	73.6685	-2.5283	0.0002842	0.0042222	DOWN	GO:0006464//GO:0016310//GO:0043170//GO:0044237//GO:0019538//GO:0044238//GO:0006468//GO:0036211//GO:0044267//GO:0044260//GO:0071704//GO:0006793//GO:0008152//GO:0006796//GO:0009987//GO:0008150//GO:0043412	cellular protein modification process//phosphorylation//macromolecule metabolic process//cellular metabolic process//protein metabolic process//primary metabolic process//protein phosphorylation//protein modification process//cellular protein metabolic process//cellular macromolecule metabolic process//organic substance metabolic process//phosphorus metabolic process//metabolic process//phosphate…	--	--	GO:0017076//GO:1901265//GO:0097367//GO:0032559//GO:0032549//GO:0005488//GO:0043168//GO:0016773//GO:0001882//GO:0016772//GO:0004672//GO:0001883//GO:0000166//GO:0003674//GO:0036094//GO:0043167//GO:0032550//GO:0035639//GO:0032555//GO:0032553//GO:0005524//GO:0016301//GO:0097159//GO:0016740//GO:0030554//GO:0003824//GO:1901363	purine nucleotide binding//nucleoside phosphate binding//carbohydrate derivative binding//adenyl ribonucleotide binding//ribonucleoside binding//binding//anion binding//phosphotransferase activity, alcohol group as acceptor//nucleoside binding//transferase activity, transferring phosphorus-containing groups//protein kinase activity//purine nucleoside binding//nucleotide binding//molecular_functio…	K17545 serine/threonine-protein kinase ULK4 [EC:2.7.11.1] | (RefSeq) serine/threonine-protein kinase RUNKEL
125	Novel00750	0.0443104	1.16381	1.64162	1.23492	2.47403	43.444	1.60815	4.7557	0.0015379	0.010582	UP	78.3904	41.9208	0.90301	0.19214	0.51209	FALSE	82.5507	1.70314	5.599	5.1327e-08	2.4484e-06	UP	38.2528	1.70159	4.4906	3.0045e-06	2.3843e-05	UP	49.945	35.4684	0.49381	0.40121	0.67111	FALSE	51.7433	1.57516	5.0378	6.3889e-07	2.458e-05	UP	GO:0006139//GO:1901360//GO:0044271//GO:0044237//GO:0019219//GO:0009059//GO:0043170//GO:0019222//GO:0016070//GO:0034641//GO:0010468//GO:0032774//GO:0065007//GO:0050794//GO:0018130//GO:0010556//GO:0060255//GO:0034654//GO:0010467//GO:0006807//GO:0009058//GO:0044238//GO:0046483//GO:0090304//GO:1903506//GO:0051252//GO:0008152//GO:1901576//GO:0044260//GO:2001141//GO:0071704//GO:0097659//GO:0034645//GO:…	nucleobase-containing compound metabolic process//organic cyclic compound metabolic process//cellular nitrogen compound biosynthetic process//cellular metabolic process//regulation of nucleobase-containing compound metabolic process//macromolecule biosynthetic process//macromolecule metabolic process//regulation of metabolic process//RNA metabolic process//cellular nitrogen compound metabolic pro…	--	--	GO:0005488//GO:0003677//GO:0003674//GO:0003700//GO:0043565//GO:0003676//GO:1901363//GO:0097159	binding//DNA binding//molecular_function//DNA-binding transcription factor activity//sequence-specific DNA binding//nucleic acid binding//heterocyclic compound binding//organic cyclic compound binding	no KO assigned | (RefSeq) WRKY transcription factor 6
126	Novel00766	151.995	41.2855	34.3009	55.6334	54.5323	4751.69	13377.9	-1.4933	0.0013086	0.0092414	DOWN	4229.51	4592.48	-0.11878	0.73668	0.98424	FALSE	4461.59	14130.5	-1.6632	0.00049033	0.0055215	DOWN	3349.62	14135.8	-2.0773	7.0911e-05	0.00040237	DOWN	2567.47	3103.61	-0.2736	0.6083	0.8494	FALSE	2661.39	13065.2	-2.2955	1.2577e-05	0.00032025	DOWN	GO:0008150//GO:0055114//GO:0008152//GO:0009405//GO:0051704	biological_process//oxidation-reduction process//metabolic process//pathogenesis//multi-organism process	GO:0005575//GO:0005576	cellular_component//extracellular region	GO:1901363//GO:0003824//GO:0016491//GO:0050662//GO:0016248//GO:0097159//GO:0032553//GO:0016247//GO:0043167//GO:0010181//GO:0036094//GO:0003674//GO:0019871//GO:0000166//GO:0008200//GO:0098772//GO:0043168//GO:0005488//GO:0097367//GO:1901265//GO:0017080//GO:0048037	heterocyclic compound binding//catalytic activity//oxidoreductase activity//coenzyme binding//channel inhibitor activity//organic cyclic compound binding//ribonucleotide binding//channel regulator activity//ion binding//FMN binding//small molecule binding//molecular_function//sodium channel inhibitor activity//nucleotide binding//ion channel inhibitor activity//molecular function regulator//anion…	K05894 12-oxophytodienoic acid reductase [EC:1.3.1.42] | (RefSeq) 12-oxophytodienoate reductase 1-like
127	Novel00767	108.74	3.66488	21.1447	16.6567	18.7195	131.5	895.622	-2.7678	0.00010155	0.0010875	DOWN	138.123	127.249	0.11829	0.94135	1	FALSE	145.804	946.835	-2.6991	0.00024893	0.003205	DOWN	27.7448	947.44	-5.0937	1.6936e-08	2.2277e-07	DOWN	147.138	25.7105	2.5167	7.3456e-08	2.205e-06	UP	152.567	874.898	-2.5197	0.00040105	0.0055775	DOWN	GO:0008152//GO:0008150//GO:0055114	metabolic process//biological_process//oxidation-reduction process	--	--	GO:0043168//GO:0005488//GO:1901265//GO:0097367//GO:0048037//GO:0000166//GO:0032553//GO:0043167//GO:0036094//GO:0003674//GO:0010181//GO:0003824//GO:1901363//GO:0016491//GO:0097159//GO:0050662	anion binding//binding//nucleoside phosphate binding//carbohydrate derivative binding//cofactor binding//nucleotide binding//ribonucleotide binding//ion binding//small molecule binding//molecular_function//FMN binding//catalytic activity//heterocyclic compound binding//oxidoreductase activity//organic cyclic compound binding//coenzyme binding	K05894 12-oxophytodienoic acid reductase [EC:1.3.1.42] | (RefSeq) 12-oxophytodienoate reductase 1-like
128	Novel00793	271.952	19.611	37.1628	27.5722	44.5304	3135	32225	-3.3616	4.7211e-12	2.3911e-10	DOWN	4662.61	3035.55	0.61918	0.086471	0.31515	FALSE	4917.09	34022.3	-2.7906	4.2284e-09	2.6184e-07	DOWN	2147.66	34029.2	-3.9859	1.0584e-13	3.5336e-12	DOWN	3769.59	1987.67	0.92333	0.0028576	0.017686	FALSE	3905.52	31469.3	-3.0104	5.4688e-10	4.5676e-08	DOWN	GO:0005975//GO:0071704//GO:0008152//GO:0008150//GO:0005996//GO:0046373//GO:0019321//GO:0044238//GO:0019566	carbohydrate metabolic process//organic substance metabolic process//metabolic process//biological_process//monosaccharide metabolic process//L-arabinose metabolic process//pentose metabolic process//primary metabolic process//arabinose metabolic process	--	--	GO:0003674//GO:0016787//GO:0004553//GO:0003824//GO:0016798//GO:0046556	molecular_function//hydrolase activity//hydrolase activity, hydrolyzing O-glycosyl compounds//catalytic activity//hydrolase activity, acting on glycosyl bonds//alpha-L-arabinofuranosidase activity	K01209 alpha-N-arabinofuranosidase [EC:3.2.1.55] | (RefSeq) alpha-L-arabinofuranosidase 1-like
129	Novel00794	0.336807	5.98003	2.16876	3.25099	3.46742	82.6049	8.91511	3.2119	0.0035781	0.020935	UP	79.8535	80.2117	-0.0064562	0.98367	1	FALSE	84.4482	9.37658	3.1709	0.00042341	0.0049104	UP	148.893	9.37341	3.9896	4.5507e-15	1.8708e-13	UP	49.9697	137.798	-1.4634	0.00075888	0.0061348	DOWN	51.8811	8.69176	2.5775	0.0018602	0.018808	UP	GO:0055114//GO:0008150//GO:0008152	oxidation-reduction process//biological_process//metabolic process	--	--	GO:0097159//GO:0016491//GO:0003824//GO:1901363//GO:0003674//GO:0043167//GO:0005506//GO:0046906//GO:0046914//GO:0043169//GO:0016705//GO:0020037//GO:0046872//GO:0005488	organic cyclic compound binding//oxidoreductase activity//catalytic activity//heterocyclic compound binding//molecular_function//ion binding//iron ion binding//tetrapyrrole binding//transition metal ion binding//cation binding//oxidoreductase activity, acting on paired donors, with incorporation or reduction of molecular oxygen//heme binding//metal ion binding//binding	no KO assigned | (RefSeq) alkane hydroxylase MAH1-like
130	Novel00906	390.528	203.175	159.871	165.983	209.263	7263.82	17608	-1.2774	2.1017e-05	0.00027769	DOWN	8303.69	7028.86	0.24046	0.40865	0.76387	FALSE	8765.6	18562.7	-1.0825	5.1431e-06	0.00012937	DOWN	8519.29	18560.7	-1.1234	9.3508e-07	8.4636e-06	DOWN	6210.28	7887.61	-0.34493	0.11195	0.2921	FALSE	6438.06	17186.1	-1.4165	6.5817e-08	3.3038e-06	DOWN	GO:0006629//GO:0044238//GO:0008150//GO:0008152//GO:0071704	lipid metabolic process//primary metabolic process//biological_process//metabolic process//organic substance metabolic process	--	--	--	--	--
131	Novel01014	57.8923	16.5773	17.7365	19.5363	20.6485	3721.53	11361.8	-1.6102	1.0834e-07	2.5486e-06	DOWN	3579.62	3599.51	-0.0079946	0.93561	1	FALSE	3777.72	11986.1	-1.6658	9.9057e-09	5.6866e-07	DOWN	3013.79	11987.3	-1.9919	2.2838e-11	5.2846e-10	DOWN	2995.93	2791.84	0.10179	0.69174	0.9071	FALSE	3105.25	11091.5	-1.8367	1.81e-10	1.7409e-08	DOWN	--	--	--	--	GO:0004519//GO:0004521//GO:0004540//GO:0016788//GO:0003824//GO:0004518//GO:0016787//GO:0003674	endonuclease activity//endoribonuclease activity//ribonuclease activity//hydrolase activity, acting on ester bonds//catalytic activity//nuclease activity//hydrolase activity//molecular_function	--
132	Novel01116	1.18973	4.00807	4.13293	5.37313	3.77256	171.637	38.7377	2.1476	0.0022477	0.0144	UP	106.871	165.799	-0.63356	0.23518	0.57263	FALSE	112.859	40.8651	1.4656	0.0058194	0.038287	UP	121.073	40.8897	1.5661	0.0076978	0.023668	UP	115.877	112.175	0.046847	0.92657	1	FALSE	120.148	37.7956	1.6685	0.0014683	0.015669	UP	--	--	--	--	--	--	--
133	Novel01140	44.2712	6.899	15.8713	9.23658	18.7394	670.21	3318.09	-2.3077	3.9948e-13	2.4083e-11	DOWN	1243.35	649.035	0.93786	0.0032458	0.028534	FALSE	1311.07	3496.12	-1.415	1.2725e-08	7.1538e-07	DOWN	482.052	3495.81	-2.8584	1.0303e-29	2.1848e-27	DOWN	1031.65	446.193	1.2092	0.00095247	0.0073398	UP	1068.63	3237.5	-1.5991	4.9963e-09	3.253e-07	DOWN	--	--	--	--	--	--	--
134	Novel01186	0.00977163	8.35987	3.19051	5.18058	2.48087	315.919	0.590396	9.0637	4.1677e-18	4.5632e-16	UP	137.268	305.715	-1.1552	0.011027	0.073004	FALSE	144.934	0.617835	7.874	5.5385e-19	2.1237e-16	UP	485.828	0.618515	9.6174	3.4944e-28	6.3645e-26	UP	173.661	450.507	-1.3753	0.0012391	0.0090395	DOWN	179.782	0.573049	8.2934	7.6026e-14	1.408e-11	UP	--	--	--	--	GO:0003674//GO:0005488//GO:0005515//GO:0046983	molecular_function//binding//protein binding//protein dimerization activity	no KO assigned | (RefSeq) uncharacterized LOC102596975
135	Novel01236	5.8037	0.509915	1.72728	1.30665	1.19599	221.44	1019.41	-2.2027	9.3064e-11	3.7759e-09	DOWN	185.644	214.422	-0.20792	0.57371	0.89618	FALSE	196.112	1075	-2.4546	6.1638e-16	1.4867e-13	DOWN	83.3309	1074.81	-3.6891	7.3781e-27	1.2169e-24	DOWN	261.575	77.051	1.7633	1.3851e-06	2.9605e-05	UP	271.094	995.23	-1.8762	1.0875e-09	8.3571e-08	DOWN	--	--	--	--	GO:0043167//GO:0030170//GO:0003674//GO:1901363//GO:0097159//GO:0043168//GO:0005488//GO:0048037	ion binding//pyridoxal phosphate binding//molecular_function//heterocyclic compound binding//organic cyclic compound binding//anion binding//binding//cofactor binding	K01760 cystathionine beta-lyase [EC:4.4.1.8] | (RefSeq) CBL; cystathionine beta-lyase
136	Novel01265	70.7288	29.98	35.3434	35.505	36.5316	3351.95	6829.54	-1.0268	0.00056685	0.0045948	DOWN	3142.09	3242.76	-0.045498	0.82891	1	FALSE	3314.66	7191.97	-1.1175	2.2539e-06	6.3717e-05	DOWN	2702.46	7191.64	-1.412	1.1982e-09	1.994e-08	DOWN	2983.94	2504.47	0.25272	0.55644	0.81151	FALSE	3090.41	6661.19	-1.108	1.4031e-05	0.0003512	DOWN	--	--	--	--	--	--	no KO assigned | (RefSeq) uncharacterized LOC102591330
137	Novel01292	3.15436	1.3358	1.0047	0.131776	0.208904	3.7741	96.7601	-4.6802	6.3201e-11	2.6361e-09	DOWN	5.42099	3.6698	0.56285	0.81021	1	FALSE	5.73759	102.107	-4.1535	2.1075e-08	1.1078e-06	DOWN	37.8192	102.145	-1.4334	0.0024688	0.0089501	DOWN	26.1775	35.0524	-0.42119	0.56465	0.81873	FALSE	27.1685	94.447	-1.7976	0.0025182	0.023656	DOWN	--	--	--	--	--	--	--
138	Novel01315	2.02923	0.28947	0.410141	0.61341	0.504709	51.9435	177.156	-1.77	7.0716e-05	0.00079833	DOWN	39.1993	50.2816	-0.3592	0.57625	0.898	FALSE	41.3648	186.817	-2.1751	3.8773e-06	0.00010128	DOWN	23.5128	186.936	-2.991	2.8514e-12	7.64e-11	DOWN	30.4176	21.7521	0.48375	0.49737	0.76275	FALSE	31.58	172.805	-2.4521	9.0089e-07	3.2959e-05	DOWN	--	--	--	--	--	--	--
139	Novel01319	0.997182	0.00909133	0.0727377	0.0602105	0.0892877	2.22621	37.959	-4.0918	0.0014526	0.010096	DOWN	2.95339	2.15326	0.45585	0.92299	1	FALSE	3.09288	40.1163	-3.6972	0.003109	0.023673	DOWN	0.3121	40.0627	-7.0041	6.6767e-05	0.00038163	DOWN	2.28048	0.291384	2.9683	0.58839	0.83589	FALSE	2.37129	37.1511	-3.9697	0.002794	0.025539	DOWN	--	--	--	--	--	--	--
140	Novel01364	2.02463	0.038737	0.370107	0.327076	0.182616	49.2863	317.534	-2.6877	2.3334e-10	8.8298e-09	DOWN	25.4186	47.7298	-0.90901	0.20108	0.5249	FALSE	26.8928	335.117	-3.6394	4.1932e-13	6.2086e-11	DOWN	5.62405	335.07	-5.8967	5.8636e-22	5.9413e-20	DOWN	49.5974	5.19832	3.2541	9.5832e-05	0.0010914	UP	51.4553	310.132	-2.5915	2.2118e-09	1.5665e-07	DOWN	GO:0008152//GO:0006793//GO:0071704//GO:0044260//GO:0043412//GO:0008150//GO:0009987//GO:0006796//GO:0044237//GO:0016310//GO:0043170//GO:0006464//GO:0044267//GO:0036211//GO:0006468//GO:0044238//GO:0019538	metabolic process//phosphorus metabolic process//organic substance metabolic process//cellular macromolecule metabolic process//macromolecule modification//biological_process//cellular process//phosphate-containing compound metabolic process//cellular metabolic process//phosphorylation//macromolecule metabolic process//cellular protein modification process//cellular protein metabolic process//pro…	--	--	GO:0005524//GO:0032553//GO:0016301//GO:0032550//GO:0032555//GO:0035639//GO:0043167//GO:0036094//GO:0003674//GO:0030554//GO:0003824//GO:1901363//GO:0016740//GO:0097159//GO:0043168//GO:0032559//GO:0032549//GO:0005488//GO:1901265//GO:0097367//GO:0017076//GO:0001883//GO:0000166//GO:0016772//GO:0001882//GO:0004672//GO:0016773	ATP binding//ribonucleotide binding//kinase activity//purine ribonucleoside binding//purine ribonucleotide binding//purine ribonucleoside triphosphate binding//ion binding//small molecule binding//molecular_function//adenyl nucleotide binding//catalytic activity//heterocyclic compound binding//transferase activity//organic cyclic compound binding//anion binding//adenyl ribonucleotide binding//rib…	K17545 serine/threonine-protein kinase ULK4 [EC:2.7.11.1] | (RefSeq) serine/threonine-protein kinase RUNKEL
141	Novel01404	3461.09	837.961	587.258	618.695	758.575	46531.4	270690	-2.5404	8.2219e-11	3.3634e-09	DOWN	52194.9	45050.6	0.21236	0.50485	0.84709	FALSE	55066.4	285658	-2.375	2.0551e-09	1.3599e-07	DOWN	60684.9	285635	-2.2348	8.8069e-09	1.2276e-07	DOWN	39415.7	56187	-0.51147	0.033274	0.12056	FALSE	40846.5	264354	-2.6942	6.3113e-11	6.6969e-09	DOWN	GO:0043170//GO:0019538//GO:0044238//GO:0071704//GO:0006508//GO:0008152//GO:0008150	macromolecule metabolic process//protein metabolic process//primary metabolic process//organic substance metabolic process//proteolysis//metabolic process//biological_process	--	--	GO:0008233//GO:0004197//GO:0008234//GO:0003674//GO:0004175//GO:0016787//GO:0070011//GO:0003824	peptidase activity//cysteine-type endopeptidase activity//cysteine-type peptidase activity//molecular_function//endopeptidase activity//hydrolase activity//peptidase activity, acting on L-amino acid peptides//catalytic activity	no KO assigned | (RefSeq) cyp; low-temperature-induced cysteine proteinase-like
142	Novel01436	1.12264	0.29411	0.384741	0.279133	0.331466	36.2349	151.758	-2.0663	2.0605e-05	0.00027314	DOWN	39.6154	35.1088	0.17423	0.84441	1	FALSE	41.8704	160.022	-1.9343	9.0448e-05	0.0014215	DOWN	36.919	160.017	-2.1158	4.4897e-07	4.3389e-06	DOWN	45.0799	34.2018	0.39841	0.56027	0.81504	FALSE	46.7038	148.128	-1.6652	0.00051314	0.0068091	DOWN	--	--	--	--	--	--	--
143	Novel01504	26.7153	1.00313	6.04734	6.25413	8.63276	306.762	1353.57	-2.1416	7.8629e-10	2.7292e-08	DOWN	378.492	296.949	0.35005	0.32312	0.67918	FALSE	399.869	1426.84	-1.8352	1.0243e-06	3.2454e-05	DOWN	47.2185	1426.02	-4.9165	4.4213e-25	5.9935e-23	DOWN	263.525	43.7287	2.5913	3.5922e-11	2.4754e-09	UP	273.321	1321.72	-2.2737	4.5317e-10	3.8063e-08	DOWN	--	--	--	--	GO:0005515//GO:0005488//GO:0003674	protein binding//binding//molecular_function	no KO assigned | (RefSeq) probable LRR receptor-like serine/threonine-protein kinase At1g53430
144	Novel01515	8.11975	2.95878	1.69332	3.04666	2.58738	60.8482	171.072	-1.4913	0.0023823	0.015057	DOWN	47.5393	59.0472	-0.31275	0.58558	0.90446	FALSE	50.1389	180.443	-1.8475	9.7912e-05	0.0015166	DOWN	57.8054	180.328	-1.6413	0.00034526	0.0016314	DOWN	30.4954	53.4769	-0.81032	0.18308	0.40701	FALSE	31.6458	167.118	-2.4008	1.5757e-06	5.2207e-05	DOWN	--	--	--	--	--	--	--
145	Novel01524	0.761729	7.08405	5.15746	9.5961	4.17627	896.269	72.257	3.6327	3.9095e-08	9.9174e-07	UP	349.094	866.275	-1.3112	0.0046953	0.038182	DOWN	368.464	76.0951	2.2756	1.657e-09	1.1315e-07	UP	626.378	76.0223	3.0425	2.679e-06	2.1554e-05	UP	430.316	580.935	-0.43298	0.37909	0.6478	FALSE	445.509	70.5457	2.6588	0.0035513	0.030666	UP	GO:0036211//GO:0006468//GO:0044238//GO:0019538//GO:0044267//GO:0016310//GO:0043170//GO:0006464//GO:0044237//GO:0009987//GO:0006796//GO:0043412//GO:0008150//GO:0071704//GO:0044260//GO:0008152//GO:0006793	protein modification process//protein phosphorylation//primary metabolic process//protein metabolic process//cellular protein metabolic process//phosphorylation//macromolecule metabolic process//cellular protein modification process//cellular metabolic process//cellular process//phosphate-containing compound metabolic process//macromolecule modification//biological_process//organic substance meta…	--	--	GO:0016773//GO:0001883//GO:0000166//GO:0016772//GO:0001882//GO:0004672//GO:1901265//GO:0097367//GO:0017076//GO:0043168//GO:0032549//GO:0032559//GO:0005488//GO:0097159//GO:0003824//GO:0030554//GO:1901363//GO:0016740//GO:0043167//GO:0036094//GO:0003674//GO:0005524//GO:0032553//GO:0016301//GO:0032550//GO:0032555//GO:0035639	phosphotransferase activity, alcohol group as acceptor//purine nucleoside binding//nucleotide binding//transferase activity, transferring phosphorus-containing groups//nucleoside binding//protein kinase activity//nucleoside phosphate binding//carbohydrate derivative binding//purine nucleotide binding//anion binding//ribonucleoside binding//adenyl ribonucleotide binding//binding//organic cyclic co…	--
146	Novel01552	98.2269	19.1446	32.8374	17.7264	34.3265	1398.76	7940.37	-2.5051	1.0598e-15	8.9159e-14	DOWN	2467.8	1354.19	0.8658	0.0039607	0.033445	FALSE	2604.78	8356.64	-1.6818	3.1266e-12	3.9457e-10	DOWN	1452.9	8357.74	-2.5242	5.7705e-26	8.7854e-24	DOWN	2295.83	1344.14	0.77234	0.00083403	0.0066045	FALSE	2380.34	7740.43	-1.7012	2.3814e-10	2.219e-08	DOWN	GO:0016310//GO:0043170//GO:0006464//GO:0044237//GO:0006468//GO:0044238//GO:0036211//GO:0019538//GO:0044267//GO:0071704//GO:0044260//GO:0008152//GO:0006793//GO:0009987//GO:0006796//GO:0043412//GO:0008150	phosphorylation//macromolecule metabolic process//cellular protein modification process//cellular metabolic process//protein phosphorylation//primary metabolic process//protein modification process//protein metabolic process//cellular protein metabolic process//organic substance metabolic process//cellular macromolecule metabolic process//metabolic process//phosphorus metabolic process//cellular …	--	--	GO:1901265//GO:0097367//GO:0017076//GO:0043168//GO:0032559//GO:0032549//GO:0005488//GO:0016773//GO:0001883//GO:0000166//GO:0001882//GO:0016772//GO:0004672//GO:0043167//GO:0003674//GO:0036094//GO:0032553//GO:0005524//GO:0016301//GO:0032550//GO:0035639//GO:0032555//GO:0097159//GO:0030554//GO:0003824//GO:1901363//GO:0016740	nucleoside phosphate binding//carbohydrate derivative binding//purine nucleotide binding//anion binding//adenyl ribonucleotide binding//ribonucleoside binding//binding//phosphotransferase activity, alcohol group as acceptor//purine nucleoside binding//nucleotide binding//nucleoside binding//transferase activity, transferring phosphorus-containing groups//protein kinase activity//ion binding//mole…	no KO assigned | (RefSeq) serine/threonine-protein kinase SAPK8-like
147	Novel01564	3.16171	0.0234823	0.970257	0.698879	0.337206	93.5481	450.692	-2.2684	0.00012992	0.0013407	DOWN	42.8995	90.8217	-1.0821	0.16124	0.46146	FALSE	45.2509	476.171	-3.3955	2.4553e-07	9.2373e-06	DOWN	3.11327	476.397	-7.2576	5.0645e-16	2.477e-14	DOWN	117.239	2.86613	5.3542	2.8217e-15	4.1071e-13	UP	121.641	440.182	-1.8555	0.00047016	0.0063606	DOWN	--	--	--	--	--	--	K15436 transportin-3 | (RefSeq) transportin-3
148	Novel01584	0.0741758	2.98435	0.571893	0.919306	0.626991	67.7995	5.66987	3.5799	7.7169e-07	1.4914e-05	UP	41.6	65.6773	-0.65881	0.29421	0.64702	FALSE	43.8858	5.97365	2.8771	0.0023782	0.019349	UP	212.92	5.96238	5.1583	2.5417e-25	3.5762e-23	UP	37.9693	196.912	-2.3746	1.3562e-08	5.0966e-07	DOWN	39.388	5.54244	2.8292	0.0033279	0.029201	UP	GO:0008152//GO:0043604//GO:1901576//GO:0044260//GO:0071704//GO:0006518//GO:0034645//GO:0008150//GO:1901564//GO:1901566//GO:0044249//GO:0009987//GO:0043043//GO:0044271//GO:0044237//GO:0009059//GO:0043170//GO:0034641//GO:0044267//GO:0009058//GO:0019538//GO:0006807//GO:0043603//GO:0010467//GO:0006412//GO:0044238	metabolic process//amide biosynthetic process//organic substance biosynthetic process//cellular macromolecule metabolic process//organic substance metabolic process//peptide metabolic process//cellular macromolecule biosynthetic process//biological_process//organonitrogen compound metabolic process//organonitrogen compound biosynthetic process//cellular biosynthetic process//cellular process//pep…	GO:0005840//GO:0005737//GO:0005575//GO:0032991//GO:0043226//GO:0043232//GO:0044424//GO:0043229//GO:0043228//GO:0005623//GO:0044444//GO:0005622//GO:0044464	ribosome//cytoplasm//cellular_component//protein-containing complex//organelle//intracellular non-membrane-bounded organelle//intracellular part//intracellular organelle//non-membrane-bounded organelle//cell//cytoplasmic part//intracellular//cell part	GO:0003674//GO:0003735//GO:0005198	molecular_function//structural constituent of ribosome//structural molecule activity	--
149	Novel01598	1.28784	0.115194	0.183139	0.257719	0.280645	18.2001	93.6796	-2.3638	0.00011044	0.0011718	DOWN	18.3246	17.5906	0.058976	1	1	FALSE	19.297	98.9187	-2.3579	0.00016178	0.0022674	DOWN	7.77854	99.025	-3.6702	5.2201e-07	4.9799e-06	DOWN	11.4804	7.17805	0.67751	0.60476	0.84642	FALSE	11.8737	91.4063	-2.9445	1.279e-05	0.0003254	DOWN	GO:0009987//GO:0051171//GO:0080090//GO:1901362//GO:0009889//GO:0050789//GO:0044249//GO:0031323//GO:0031326//GO:0008150//GO:0006355//GO:2000112//GO:0019438//GO:1901576//GO:0044260//GO:2001141//GO:0071704//GO:0097659//GO:0034645//GO:0006351//GO:0006725//GO:1903506//GO:0051252//GO:0008152//GO:0010467//GO:0006807//GO:0009058//GO:0044238//GO:0046483//GO:0090304//GO:0016070//GO:0034641//GO:0010468//GO:…	cellular process//regulation of nitrogen compound metabolic process//regulation of primary metabolic process//organic cyclic compound biosynthetic process//regulation of biosynthetic process//regulation of biological process//cellular biosynthetic process//regulation of cellular metabolic process//regulation of cellular biosynthetic process//biological_process//regulation of transcription, DNA-te…	--	--	GO:0097159//GO:0043565//GO:0003676//GO:1901363//GO:0003674//GO:0003700//GO:0003677//GO:0005488	organic cyclic compound binding//sequence-specific DNA binding//nucleic acid binding//heterocyclic compound binding//molecular_function//DNA-binding transcription factor activity//DNA binding//binding	--
150	Novel01644	58.774	8.48022	26.8227	16.8299	27.7374	2307.92	8298.08	-1.8462	1.4884e-09	4.9016e-08	DOWN	3469.11	2234.23	0.63479	0.031204	0.15725	FALSE	3665.32	8743.22	-1.2542	1.5425e-07	6.337e-06	DOWN	1117.44	8744.58	-2.9682	5.8552e-34	1.6246e-31	DOWN	3250.1	1034.63	1.6514	8.744e-13	8.1788e-11	UP	3372.53	8094.38	-1.2631	1.987e-06	6.3982e-05	DOWN	GO:0044237//GO:0016310//GO:0043170//GO:0006464//GO:0044267//GO:0036211//GO:0006468//GO:0044238//GO:0019538//GO:0008152//GO:0006793//GO:0071704//GO:0044260//GO:0043412//GO:0008150//GO:0009987//GO:0006796	cellular metabolic process//phosphorylation//macromolecule metabolic process//cellular protein modification process//cellular protein metabolic process//protein modification process//protein phosphorylation//primary metabolic process//protein metabolic process//metabolic process//phosphorus metabolic process//organic substance metabolic process//cellular macromolecule metabolic process//macromole…	--	--	GO:0043168//GO:0032559//GO:0032549//GO:0005488//GO:1901265//GO:0097367//GO:0017076//GO:0001883//GO:0000166//GO:0016772//GO:0001882//GO:0004672//GO:0016773//GO:0005515//GO:0005524//GO:0032553//GO:0016301//GO:0032550//GO:0032555//GO:0035639//GO:0043167//GO:0036094//GO:0003674//GO:0030554//GO:0003824//GO:1901363//GO:0016740//GO:0097159	anion binding//adenyl ribonucleotide binding//ribonucleoside binding//binding//nucleoside phosphate binding//carbohydrate derivative binding//purine nucleotide binding//purine nucleoside binding//nucleotide binding//transferase activity, transferring phosphorus-containing groups//nucleoside binding//protein kinase activity//phosphotransferase activity, alcohol group as acceptor//protein binding//…	--
151	Novel01661	0.0981518	20.006	5.63596	11.1179	5.63594	818.814	7.35166	6.7993	2.147e-48	3.5522e-45	UP	372.898	792.635	-1.0879	0.0010941	0.011868	DOWN	393.706	7.72468	5.6715	2.5594e-23	1.7398e-20	UP	1416.43	7.72052	7.5193	9.1133e-21	8.1493e-19	UP	368.722	1311.67	-1.8308	0.00016928	0.0017592	DOWN	382.228	7.16493	5.7373	1.3557e-31	3.1094e-28	UP	GO:0008150//GO:0008152	biological_process//metabolic process	--	--	GO:0097159//GO:0003824//GO:0003676//GO:1901363//GO:0043167//GO:0003674//GO:0000287//GO:0016829//GO:0043169//GO:0016835//GO:0016838//GO:0046872//GO:0010333//GO:0005488	organic cyclic compound binding//catalytic activity//nucleic acid binding//heterocyclic compound binding//ion binding//molecular_function//magnesium ion binding//lyase activity//cation binding//carbon-oxygen lyase activity//carbon-oxygen lyase activity, acting on phosphates//metal ion binding//terpene synthase activity//binding	K14173 alpha-farnesene synthase [EC:4.2.3.46] | (RefSeq) alpha-farnesene synthase-like
152	Novel01693	1.20859	6.47351	4.525	7.56413	3.52883	1180.78	192.99	2.6131	6.7624e-06	0.00010365	UP	501.078	1143.93	-1.1909	0.0077804	0.056038	FALSE	528.644	202.968	1.381	2.2576e-05	0.00044894	UP	971.772	203.04	2.2589	1.6432e-16	8.5884e-15	UP	619.866	900.141	-0.53819	0.08338	0.23645	FALSE	643.888	188.012	1.776	0.00093299	0.011092	UP	--	--	--	--	--	--	K14544 U3 small nucleolar RNA-associated protein 22 | (RefSeq) nucleolar protein 6
153	Novel01703	4.67076	30.273	183.706	133.118	107.238	5763.32	205.94	4.8066	1.1318e-42	1.1235e-39	UP	4135.22	5576.46	-0.43139	0.21092	0.5387	FALSE	4373.32	216.577	4.3358	6.715e-09	3.9457e-07	UP	1253.58	216.249	2.5353	0.0098086	0.029108	UP	7026.58	1162.41	2.5957	1.1154e-07	3.1982e-06	UP	7282.07	201.018	5.179	1.5586e-18	5.6675e-16	UP	--	--	--	--	GO:0003824//GO:0016740//GO:0016741//GO:0008171//GO:0003674//GO:0008168	catalytic activity//transferase activity//transferase activity, transferring one-carbon groups//O-methyltransferase activity//molecular_function//methyltransferase activity	K00588 caffeoyl-CoA O-methyltransferase [EC:2.1.1.104] | (RefSeq) CCoAMT, CCoAOMT; caffeoyl-CoA O-methyltransferase
154	Novel01736	29.712	15	12.1468	8.52578	15.8231	615.356	2242.98	-1.8659	1.1469e-07	2.6824e-06	DOWN	1043.05	596.475	0.80627	0.011199	0.073833	FALSE	1101.01	2366.51	-1.1039	0.00031237	0.0038463	DOWN	1049.34	2366.04	-1.173	0.00028704	0.0013886	DOWN	784.69	971	-0.30735	0.21295	0.4494	FALSE	813.821	2190.48	-1.4285	9.6576e-06	0.00025596	DOWN	GO:0034220//GO:0098660//GO:0015672//GO:0008150//GO:0051234//GO:0006810//GO:0098662//GO:0009987//GO:0098655//GO:1902600//GO:0006811//GO:0055085//GO:0015991//GO:0006812//GO:0015988//GO:0051179	ion transmembrane transport//inorganic ion transmembrane transport//monovalent inorganic cation transport//biological_process//establishment of localization//transport//inorganic cation transmembrane transport//cellular process//cation transmembrane transport//proton transmembrane transport//ion transport//transmembrane transport//ATP hydrolysis coupled proton transport//cation transport//energy …	GO:0033178//GO:0032991//GO:0016020//GO:0016469//GO:0005575//GO:0098796//GO:0044425	proton-transporting two-sector ATPase complex, catalytic domain//protein-containing complex//membrane//proton-transporting two-sector ATPase complex//cellular_component//membrane protein complex//membrane part	GO:0016787//GO:0015077//GO:0015399//GO:0016818//GO:0003674//GO:0003824//GO:0036442//GO:0022857//GO:0016462//GO:0043492//GO:0015405//GO:0005488//GO:0042623//GO:0016817//GO:0015078//GO:0008324//GO:0016887//GO:0015075//GO:0019829//GO:0022890//GO:0042625//GO:0042626//GO:0046961//GO:0022804//GO:0005215//GO:0044769//GO:0005515//GO:0017111	hydrolase activity//monovalent inorganic cation transmembrane transporter activity//primary active transmembrane transporter activity//hydrolase activity, acting on acid anhydrides, in phosphorus-containing anhydrides//molecular_function//catalytic activity//proton-exporting ATPase activity//transmembrane transporter activity//pyrophosphatase activity//ATPase activity, coupled to movement of subs…	no KO assigned | (RefSeq) uncharacterized LOC102606274
155	Novel01799	108.294	4.45034	25.7076	6.17616	19.9665	239.706	4271.85	-4.1555	5.0182e-34	2.5767e-31	DOWN	708.241	231.826	1.6112	0.0041636	0.034719	UP	746.459	4496.76	-2.5908	3.9978e-24	3.1466e-21	DOWN	164.185	4495.64	-4.7751	2.6763e-67	4.1818e-64	DOWN	866.907	152.06	2.5112	7.4263e-05	0.00087896	UP	899.71	4166.48	-2.2113	6.2818e-15	1.3874e-12	DOWN	--	--	--	--	GO:0003674//GO:0030234//GO:0004857//GO:0098772	molecular_function//enzyme regulator activity//enzyme inhibitor activity//molecular function regulator	no KO assigned | (RefSeq) 21 kDa protein-like
156	Novel01814	0.239707	1.42758	1.78883	2.04368	1.92755	309.175	35.7493	3.1124	0.00010547	0.0011234	UP	258.178	298.791	-0.21077	0.72904	0.98094	FALSE	272.755	37.4222	2.8656	3.6663e-10	2.9477e-08	UP	204.746	37.3621	2.4542	1.0724e-09	1.8099e-08	UP	234.72	189.489	0.30883	0.31289	0.57598	FALSE	243.811	34.8042	2.8084	9.1973e-08	4.4664e-06	UP	GO:0036211//GO:0044238//GO:0019538//GO:0016311//GO:0044267//GO:0043170//GO:0006464//GO:0044237//GO:0006470//GO:0009987//GO:0006796//GO:0043412//GO:0008150//GO:0071704//GO:0044260//GO:0008152//GO:0006793	protein modification process//primary metabolic process//protein metabolic process//dephosphorylation//cellular protein metabolic process//macromolecule metabolic process//cellular protein modification process//cellular metabolic process//protein dephosphorylation//cellular process//phosphate-containing compound metabolic process//macromolecule modification//biological_process//organic substance …	--	--	GO:0004725//GO:0042578//GO:0003824//GO:0016788//GO:0016791//GO:0003674//GO:0004721//GO:0016787	protein tyrosine phosphatase activity//phosphoric ester hydrolase activity//catalytic activity//hydrolase activity, acting on ester bonds//phosphatase activity//molecular_function//phosphoprotein phosphatase activity//hydrolase activity	K17592 sacsin | (RefSeq) uncharacterized LOC102601595
157	Novel01847	1.14648	12.9018	7.82085	8.29497	7.35466	527.427	74.5392	2.8229	2.5892e-10	9.7484e-09	UP	421.423	510.019	-0.27528	0.43751	0.79005	FALSE	445.291	78.5766	2.5026	8.1437e-12	9.3692e-10	UP	781.789	78.6416	3.3134	3.5149e-21	3.3233e-19	UP	434.697	723.61	-0.7352	0.0069139	0.03594	FALSE	451.302	72.6788	2.6345	1.1341e-12	1.7079e-10	UP	GO:0009987//GO:0040007//GO:0009664//GO:0070726//GO:0008150//GO:0071704//GO:0005975//GO:0042546//GO:0071669//GO:0008152//GO:0044238//GO:0030198//GO:0071554//GO:0016043//GO:0045229//GO:0071840//GO:0022607//GO:0009832//GO:0071555//GO:0044085//GO:0010215//GO:0016049//GO:0043062//GO:0071668	cellular process//growth//plant-type cell wall organization//cell wall assembly//biological_process//organic substance metabolic process//carbohydrate metabolic process//cell wall biogenesis//plant-type cell wall organization or biogenesis//metabolic process//primary metabolic process//extracellular matrix organization//cell wall organization or biogenesis//cellular component organization//extern…	GO:0016020//GO:0005575//GO:0031224//GO:0044425//GO:0031225	membrane//cellular_component//intrinsic component of membrane//membrane part//anchored component of membrane	GO:0003824//GO:0030246//GO:0003674//GO:0004553//GO:0016787//GO:0005488//GO:0016798	catalytic activity//carbohydrate binding//molecular_function//hydrolase activity, hydrolyzing O-glycosyl compounds//hydrolase activity//binding//hydrolase activity, acting on glycosyl bonds	no KO assigned | (RefSeq) COBRA-like protein 4
158	Novel01895	0.779748	4.68748	2.26445	4.26184	3.66265	643.301	118.281	2.4433	2.0382e-11	9.3423e-10	UP	493.755	622.209	-0.33361	0.35606	0.71457	FALSE	521.826	124.164	2.0713	1.7805e-08	9.6472e-07	UP	675.141	124.16	2.443	1.5015e-16	7.9036e-15	UP	302.101	625.032	-1.0489	0.00011909	0.0013069	DOWN	313.352	115.151	1.4443	0.00017673	0.0029033	UP	GO:0015031//GO:0036211//GO:0006468//GO:0044238//GO:0045184//GO:0019538//GO:0051179//GO:0044267//GO:0016310//GO:0043170//GO:0006464//GO:0044237//GO:0008104//GO:0009987//GO:0006796//GO:0043412//GO:0008150//GO:0051234//GO:0006810//GO:0071704//GO:0033036//GO:0044260//GO:0008152//GO:0071702//GO:0006793	protein transport//protein modification process//protein phosphorylation//primary metabolic process//establishment of protein localization//protein metabolic process//localization//cellular protein metabolic process//phosphorylation//macromolecule metabolic process//cellular protein modification process//cellular metabolic process//protein localization//cellular process//phosphate-containing comp…	GO:0031224//GO:0016021//GO:0044425//GO:0016020//GO:0005575	intrinsic component of membrane//integral component of membrane//membrane part//membrane//cellular_component	GO:0016773//GO:0005515//GO:0001883//GO:0000166//GO:0016772//GO:0001882//GO:0004672//GO:1901265//GO:0097367//GO:0017076//GO:0043168//GO:0032559//GO:0032549//GO:0005488//GO:0097159//GO:0030554//GO:0003824//GO:1901363//GO:0016740//GO:0043167//GO:0036094//GO:0003674//GO:0005524//GO:0032553//GO:0016301//GO:0032550//GO:0032555//GO:0035639	phosphotransferase activity, alcohol group as acceptor//protein binding//purine nucleoside binding//nucleotide binding//transferase activity, transferring phosphorus-containing groups//nucleoside binding//protein kinase activity//nucleoside phosphate binding//carbohydrate derivative binding//purine nucleotide binding//anion binding//adenyl ribonucleotide binding//ribonucleoside binding//binding//…	no KO assigned | (RefSeq) probable LRR receptor-like serine/threonine-protein kinase At3g47570
159	Novel01979	0.411965	1.25384	1.82531	1.89527	2.3199	358.87	79.2869	2.1783	4.4733e-06	7.1933e-05	UP	389.261	347.105	0.16536	0.61502	0.92383	FALSE	411.353	83.458	2.3013	5.7223e-05	0.00096749	UP	226.083	83.4732	1.4375	4.9077e-05	0.0002896	UP	302.291	209.442	0.52939	0.099039	0.26746	FALSE	313.959	77.2942	2.0221	4.5668e-07	1.8229e-05	UP	--	--	--	--	--	--	K17592 sacsin | (RefSeq) uncharacterized LOC102601595
160	Novel01999	21.0659	0.865672	5.46098	6.03139	3.57818	718.86	2645.29	-1.8796	0.00010271	0.0010982	DOWN	398.843	696.994	-0.80532	0.12427	0.39563	FALSE	421.091	2793.4	-2.7298	3.1614e-07	1.1573e-05	DOWN	100.245	2795.05	-4.8013	1.1544e-13	3.8378e-12	DOWN	585.91	92.8895	2.6571	1.6237e-17	3.4856e-15	UP	607.486	2582.51	-2.0879	1.073e-05	0.00027942	DOWN	--	--	--	--	--	--	no KO assigned | (RefSeq) uncharacterized LOC102604303
161	Novel02014	296.643	101.616	93.3847	85.9037	106.788	8903.2	32181.5	-1.8538	1.3638e-06	2.4675e-05	DOWN	10187.8	8627.13	0.23989	0.46578	0.8144	FALSE	10744.6	33969.3	-1.6606	1.0176e-05	0.00023145	DOWN	10199.1	33971.6	-1.7359	4.3355e-06	3.3191e-05	DOWN	8714.8	9438.19	-0.11504	0.54521	0.80224	FALSE	9030.33	31427.5	-1.7992	2.7198e-06	8.4741e-05	DOWN	--	--	--	--	GO:0005515//GO:0005488//GO:0003674	protein binding//binding//molecular_function	no KO assigned | (RefSeq) F-box/LRR-repeat protein 14
162	Novel02032	52.1364	5.37273	24.8821	21.8275	16.3525	775.817	1925.64	-1.3115	2.9975e-05	0.00037797	DOWN	539.458	751.67	-0.47859	0.15367	0.44976	FALSE	569.551	2030.49	-1.8339	1.0838e-09	7.8049e-08	DOWN	184.457	2031.46	-3.4612	5.4519e-27	9.093e-25	DOWN	790.621	170.763	2.211	7.407e-15	1.0138e-12	UP	819.732	1878.57	-1.1964	1.8209e-05	0.00043681	DOWN	--	--	--	--	--	--	no KO assigned | (RefSeq) polyadenylate-binding protein-interacting protein 4-like
163	Novel02090	193.36	67.394	73.2388	59.7116	94.2727	2508.49	8430.92	-1.7489	2.4324e-06	4.1459e-05	DOWN	3641.21	2427.86	0.58473	0.13733	0.42074	FALSE	3841.71	8900.13	-1.2121	0.0016401	0.014444	DOWN	2717.78	8902.46	-1.7118	8.1616e-06	5.8224e-05	DOWN	2719.02	2515.51	0.11224	0.54632	0.80333	FALSE	2819.94	8232.18	-1.5456	3.9313e-05	0.0008436	DOWN	GO:0055114//GO:0008610//GO:1901362//GO:0008150//GO:0006694//GO:1901576//GO:0071704//GO:0008152//GO:0009058//GO:0044238//GO:0006629//GO:0008202//GO:1901360	oxidation-reduction process//lipid biosynthetic process//organic cyclic compound biosynthetic process//biological_process//steroid biosynthetic process//organic substance biosynthetic process//organic substance metabolic process//metabolic process//biosynthetic process//primary metabolic process//lipid metabolic process//steroid metabolic process//organic cyclic compound metabolic process	--	--	GO:0050662//GO:0016229//GO:0016491//GO:0003824//GO:0003674//GO:0003854//GO:0033764//GO:0048037//GO:0016616//GO:0016614//GO:0005488	coenzyme binding//steroid dehydrogenase activity//oxidoreductase activity//catalytic activity//molecular_function//3-beta-hydroxy-delta5-steroid dehydrogenase activity//steroid dehydrogenase activity, acting on the CH-OH group of donors, NAD or NADP as acceptor//cofactor binding//oxidoreductase activity, acting on the CH-OH group of donors, NAD or NADP as acceptor//oxidoreductase activity, acting…	no KO assigned | (RefSeq) anthocyanidin reductase-like
164	Novel02206	0.536143	11.5736	14.3497	56.4968	7.87741	2332.53	21.7919	6.742	0.005173	0.028267	UP	287.474	2252.83	-2.9702	0.10356	0.3533	FALSE	303.447	22.8537	3.7309	3.1473e-16	7.9774e-14	UP	448.238	22.8448	4.2943	1.7214e-06	1.449e-05	UP	521.878	415.44	0.32907	0.65705	0.88525	FALSE	540.763	21.2113	4.6721	3.8067e-06	0.00011362	UP	--	--	--	--	GO:0003824//GO:0016787//GO:0003674	catalytic activity//hydrolase activity//molecular_function	no KO assigned | (RefSeq) UPF0483 protein CG5412-like
165	Novel02237	6.74602	3.31559	3.66859	2.75916	3.67843	159.183	396.921	-1.3182	0.00023618	0.0022252	DOWN	192.137	154.026	0.31896	0.43889	0.79094	FALSE	202.743	417.748	-1.043	0.0014987	0.013481	DOWN	183.187	417.84	-1.1896	4.5733e-05	0.00027193	DOWN	186.39	169.46	0.13738	0.64876	0.88034	FALSE	193.334	386.9	-1.0009	0.004049	0.033903	DOWN	--	--	--	--	--	--	no KO assigned | (RefSeq) uncharacterized protein At5g43822
166	Novel02359	4.20366	0.169324	1.56558	1.2113	1.30667	159.377	568.751	-1.8354	1.1499e-06	2.1309e-05	DOWN	158.49	154.068	0.040821	1	1	FALSE	167.251	600.339	-1.8438	3.3493e-05	0.00061646	DOWN	21.2407	600.452	-4.8211	2.9078e-19	2.1855e-17	DOWN	180.797	19.6323	3.2031	6.942e-12	5.5681e-10	UP	187.463	555.352	-1.5668	1.4542e-05	0.00036164	DOWN	--	--	--	--	GO:0003677//GO:0005488//GO:1901363//GO:0003676//GO:0097159//GO:0003674	DNA binding//binding//heterocyclic compound binding//nucleic acid binding//organic cyclic compound binding//molecular_function	K05931 type I protein arginine methyltransferase [EC:2.1.1.319] | (RefSeq) probable histone-arginine methyltransferase 1.3
167	Novel02365	22.2233	6.66668	5.34469	7.42767	4.64072	1117.79	3499.67	-1.6466	1.7549e-07	3.9775e-06	DOWN	633.812	1083.89	-0.77409	0.069477	0.27297	FALSE	670.143	3690.71	-2.4614	1.7307e-12	2.2904e-10	DOWN	973.7	3689.63	-1.9219	7.1641e-10	1.2608e-08	DOWN	721.634	901.67	-0.32133	0.18704	0.41245	FALSE	748.557	3417.17	-2.1906	6.8739e-12	8.7075e-10	DOWN	--	--	--	--	--	--	K12124 GIGANTEA | (RefSeq) protein GIGANTEA-like
168	Novel02388	0.207535	5.81788	10.5282	5.22285	7.02681	301.336	12.0314	4.6465	1.3825e-21	2.2136e-19	UP	357.066	291.75	0.29146	0.62487	0.92981	FALSE	378.4	12.6129	4.9069	0.0021041	0.017579	UP	322.762	12.6138	4.6774	2.34e-15	1.0231e-13	UP	538.375	298.427	0.85123	0.0024256	0.015525	FALSE	558.523	11.7026	5.5767	4.8357e-37	2.0598e-33	UP	GO:0008150//GO:0008152//GO:0071704//GO:0006629//GO:0044238	biological_process//metabolic process//organic substance metabolic process//lipid metabolic process//primary metabolic process	--	--	--	--	--
169	Novel02392	0.538571	0.0559487	0.00302525	0.0297095	0	3.54461	67.8315	-4.2583	0.0015285	0.01053	DOWN	0	3.43362	#NAME?	0.3313	0.6879	FALSE	0	71.7621	#NAME?	8.0363e-06	0.00018866	DOWN	6.36595	71.6893	-3.4933	0.0068993	0.021506	DOWN	0.320841	5.92114	-4.2059	0.18116	0.40413	FALSE	0.331074	66.4061	-7.648	4.7443e-05	0.00098378	DOWN	--	--	--	--	--	--	--
170	Novel02418	8.32579	87.5121	43.2031	82.4326	36.675	3375.93	351.996	3.2617	3.9232e-23	7.3947e-21	UP	1338.03	3266.83	-1.2878	2.5537e-05	0.00048951	DOWN	1414.37	371.243	1.9297	0.00048645	0.0054944	UP	3428.92	371.178	3.2076	2.2788e-36	7.1213e-34	UP	1576.31	3176.76	-1.011	4.8797e-06	8.7659e-05	DOWN	1634.57	343.672	2.2498	2.8004e-10	2.5226e-08	UP	GO:0050794//GO:0065007//GO:0008150//GO:0050789//GO:0019725//GO:0045454//GO:0009987//GO:0042592//GO:0065008	regulation of cellular process//biological regulation//biological_process//regulation of biological process//cellular homeostasis//cell redox homeostasis//cellular process//homeostatic process//regulation of biological quality	--	--	--	--	K03671 thioredoxin 1 | (RefSeq) thioredoxin H2-like
171	Novel02446	3.2579	13.1368	8.61268	6.96466	7.9111	475.317	229.324	1.0515	0.0022479	0.0144	UP	489.459	460.177	0.088999	0.78865	1	FALSE	516.92	241.661	1.097	0.00045905	0.0052323	UP	860.76	241.653	1.8327	1.0161e-11	2.4889e-10	UP	527.966	797.498	-0.59504	0.018544	0.077159	FALSE	547.197	223.76	1.2901	0.0056001	0.043102	UP	--	--	GO:0016020//GO:0005575//GO:0044425//GO:0016021//GO:0031224	membrane//cellular_component//membrane part//integral component of membrane//intrinsic component of membrane	GO:0003674//GO:1901363//GO:0003676//GO:0097159//GO:0005488//GO:0003677	molecular_function//heterocyclic compound binding//nucleic acid binding//organic cyclic compound binding//binding//DNA binding	no KO assigned | (RefSeq) uncharacterized LOC102605709
172	Novel02448	0.7974	0.0995734	0.325211	0.222547	0.157939	41.3789	152.839	-1.885	6.8191e-05	0.00077482	DOWN	27.5682	40.0856	-0.54008	0.42003	0.77405	FALSE	29.0639	160.898	-2.4688	1.0895e-06	3.4194e-05	DOWN	17.7361	160.856	-3.181	6.0501e-12	1.5325e-10	DOWN	54.8601	16.4946	1.7338	0.040646	0.14019	FALSE	56.83	149.077	-1.3913	0.0019276	0.019326	DOWN	GO:0016032//GO:0044403//GO:0051704//GO:0044419//GO:0044764//GO:0008150//GO:0009987	viral process//symbiont process//multi-organism process//interspecies interaction between organisms//multi-organism cellular process//biological_process//cellular process	GO:0036338//GO:0019031//GO:0044423//GO:0005575//GO:0019012	viral membrane//viral envelope//virion part//cellular_component//virion	--	--	--
173	Novel02497	14.9406	6.72012	7.52569	6.23645	6.72328	715.516	1773.33	-1.3094	3.2013e-05	0.00040007	DOWN	708.942	692.891	0.03304	0.98146	1	FALSE	748.286	1869.41	-1.3209	3.3748e-07	1.2339e-05	DOWN	742.593	1869.67	-1.3321	4.941e-08	5.8698e-07	DOWN	770.649	687.393	0.16494	0.54314	0.80074	FALSE	799.127	1730.34	-1.1146	5.7509e-05	0.001161	DOWN	GO:0019219//GO:0009059//GO:0006464//GO:0019222//GO:0016310//GO:0043170//GO:0006139//GO:1901360//GO:0044271//GO:0044237//GO:0006807//GO:0009058//GO:0019538//GO:0010467//GO:0090304//GO:0006468//GO:0046483//GO:0044238//GO:0036211//GO:0010468//GO:0032774//GO:0065007//GO:0016070//GO:0034641//GO:0010556//GO:0060255//GO:0034654//GO:0044267//GO:0050794//GO:0018130//GO:1901576//GO:0044260//GO:2001141//GO:…	regulation of nucleobase-containing compound metabolic process//macromolecule biosynthetic process//cellular protein modification process//regulation of metabolic process//phosphorylation//macromolecule metabolic process//nucleobase-containing compound metabolic process//organic cyclic compound metabolic process//cellular nitrogen compound biosynthetic process//cellular metabolic process//nitroge…	GO:0043229//GO:0044424//GO:0005622//GO:0005634//GO:0044464//GO:0005623//GO:0005575//GO:0043231//GO:0043227//GO:0005737//GO:0043226	intracellular organelle//intracellular part//intracellular//nucleus//cell part//cell//cellular_component//intracellular membrane-bounded organelle//membrane-bounded organelle//cytoplasm//organelle	GO:0016773//GO:0016772//GO:0004672//GO:0003674//GO:0016301//GO:0016740//GO:0003824	phosphotransferase activity, alcohol group as acceptor//transferase activity, transferring phosphorus-containing groups//protein kinase activity//molecular_function//kinase activity//transferase activity//catalytic activity	no KO assigned | (RefSeq) probable receptor-like protein kinase At5g18500
174	Novel02505	17.3646	1.25074	7.45572	4.77344	3.46343	202.621	777.776	-1.9406	0.00015808	0.0015904	DOWN	136.766	196.466	-0.52257	0.24794	0.58956	FALSE	144.451	821.565	-2.5078	5.5523e-06	0.00013816	DOWN	51.3631	821.914	-4.0002	9.4275e-10	1.6094e-08	DOWN	285.627	47.6856	2.5825	1.8524e-11	1.3514e-09	UP	296.161	759.581	-1.3588	0.0021579	0.020965	DOWN	--	--	--	--	--	--	K16276 zinc finger protein-like protein | (RefSeq) uncharacterized LOC102582364
175	Novel02532	36.2642	1.85434	9.25805	10.1941	5.98706	650.708	2454.59	-1.9154	5.8183e-05	0.00067708	DOWN	361.377	631.77	-0.8059	0.25906	0.60394	FALSE	381.238	2590.9	-2.7647	1.01e-08	5.7759e-07	DOWN	116.401	2592.61	-4.4772	3.4957e-15	1.4679e-13	DOWN	540.705	107.555	2.3298	7.5021e-07	1.7272e-05	UP	560.41	2395.55	-2.0958	9.3395e-07	3.3795e-05	DOWN	--	--	--	--	--	--	no KO assigned | (RefSeq) uncharacterized LOC102579905
176	Novel02546	2.79437	0.120717	1.53024	1.23534	0.730577	243.79	582.117	-1.2557	0.0024141	0.015219	DOWN	135.566	236.627	-0.80362	0.20146	0.52549	FALSE	143.086	614.309	-2.1021	7.6654e-08	3.427e-06	DOWN	23.2395	614.556	-4.7249	2.3268e-21	2.2428e-19	DOWN	272.084	21.5318	3.6595	3.361e-18	7.774e-16	UP	282.216	568.2	-1.0096	0.0019844	0.019775	DOWN	GO:0051179//GO:0006810//GO:0051234//GO:0008150	localization//transport//establishment of localization//biological_process	GO:0016020//GO:0005575	membrane//cellular_component	GO:0005215//GO:0003674	transporter activity//molecular_function	--
177	Novel02583	1.26142	0.14083	0.263525	0.2634	0.233248	20.1685	100.006	-2.3099	4.7928e-05	0.0005707	DOWN	16.1414	19.562	-0.27729	0.79973	1	FALSE	17.0259	105.133	-2.6264	3.1894e-05	0.00059331	DOWN	10.5603	105.092	-3.3149	1.0912e-09	1.8365e-08	DOWN	18.105	9.76168	0.89119	0.3701	0.6377	FALSE	18.7693	97.479	-2.3767	0.00011705	0.0020737	DOWN	--	--	--	--	--	--	--
178	Novel02589	0.1816	1.78756	3.64757	3.15692	1.83521	228.398	13.5081	4.0797	0.00045786	0.0038551	UP	118.17	220.646	-0.90087	0.2172	0.54749	FALSE	124.787	14.2749	3.1279	1.68e-07	6.7691e-06	UP	121.585	14.2431	3.0936	0.0007077	0.0030326	UP	233.549	112.864	1.0491	0.1048	0.27829	FALSE	241.881	13.2325	4.1921	8.8699e-07	3.2732e-05	UP	GO:0044237//GO:0019752//GO:0043436//GO:0008152//GO:0071704//GO:0008150//GO:0044281//GO:0009987//GO:0006082	cellular metabolic process//carboxylic acid metabolic process//oxoacid metabolic process//metabolic process//organic substance metabolic process//biological_process//small molecule metabolic process//cellular process//organic acid metabolic process	--	--	GO:0043168//GO:0005488//GO:0048037//GO:0016830//GO:0016829//GO:0016831//GO:0043167//GO:0030170//GO:0003674//GO:0003824//GO:1901363//GO:0097159	anion binding//binding//cofactor binding//carbon-carbon lyase activity//lyase activity//carboxy-lyase activity//ion binding//pyridoxal phosphate binding//molecular_function//catalytic activity//heterocyclic compound binding//organic cyclic compound binding	K01580 glutamate decarboxylase [EC:4.1.1.15] | (RefSeq) glutamate decarboxylase-like
179	Novel02612	55.819	219.464	175.923	239.881	162.793	6447.68	1520.87	2.0839	8.8103e-07	1.6841e-05	UP	3917.17	6240.17	-0.67178	0.05662	0.23858	FALSE	4138.45	1598.58	1.3723	1.0038e-05	0.00022935	UP	5642.87	1598.74	1.8195	2.4198e-14	8.8255e-13	UP	4162.98	5224.09	-0.32756	0.1388	0.33852	FALSE	4322.03	1481.53	1.5446	9.1456e-08	4.4558e-06	UP	--	--	--	--	--	--	--
180	Novel02646	1.12097	0.0363808	0.0851305	0.0102699	0.0715549	2.81179	325.565	-6.8553	5.5005e-19	6.6861e-17	DOWN	18.8976	2.73233	2.79	0.20689	0.53318	FALSE	20.0021	343.601	-4.1025	4.3662e-11	4.2676e-09	DOWN	9.78114	343.918	-5.1359	4.8492e-14	1.6957e-12	DOWN	21.0181	9.06208	1.2137	0.23036	0.47327	FALSE	21.831	317.623	-3.8629	9.1658e-11	9.424e-09	DOWN	GO:0044260//GO:1901576//GO:0034645//GO:0071704//GO:0006725//GO:0006278//GO:0008152//GO:0006260//GO:0009987//GO:0044249//GO:0008150//GO:0009059//GO:0043170//GO:1901360//GO:0006139//GO:0044237//GO:0009058//GO:0006807//GO:0046483//GO:0044238//GO:0090304//GO:0034641//GO:0006259	cellular macromolecule metabolic process//organic substance biosynthetic process//cellular macromolecule biosynthetic process//organic substance metabolic process//cellular aromatic compound metabolic process//RNA-dependent DNA biosynthetic process//metabolic process//DNA replication//cellular process//cellular biosynthetic process//biological_process//macromolecule biosynthetic process//macromol…	--	--	GO:0003674//GO:0016779//GO:0016740//GO:0003964//GO:0003824//GO:0016772//GO:0034061	molecular_function//nucleotidyltransferase activity//transferase activity//RNA-directed DNA polymerase activity//catalytic activity//transferase activity, transferring phosphorus-containing groups//DNA polymerase activity	--
181	Novel02652	73.8865	31.0579	28.3278	32.1106	40.9665	2094.76	4983.61	-1.2504	4.2745e-05	0.00051351	DOWN	2441.92	2027.48	0.26833	0.40322	0.75856	FALSE	2576.59	5255.36	-1.0283	2.0019e-05	0.00040619	DOWN	1947.95	5255.95	-1.432	1.0781e-09	1.8185e-08	DOWN	1642.48	1802.05	-0.13376	0.58904	0.83632	FALSE	1702.38	4863.87	-1.5146	2.3572e-08	1.2944e-06	DOWN	--	--	--	--	--	--	no KO assigned | (RefSeq) phosphoglycolate phosphatase
182	Novel02708	3.02879	13.649	15.3188	7.43636	10.7917	438.679	181.065	1.2767	0.0004365	0.0037141	UP	568.454	424.49	0.42131	0.16928	0.47593	FALSE	600.989	190.297	1.6591	0.00017868	0.0024481	UP	769.54	190.357	2.0153	7.2774e-13	2.1714e-11	UP	802.757	713.01	0.17104	0.5534	0.8091	FALSE	832.318	176.331	2.2388	6.9504e-12	8.7075e-10	UP	GO:0006812//GO:0044271//GO:0006139//GO:1901360//GO:0006811//GO:0044237//GO:0009059//GO:0019219//GO:0019222//GO:0006813//GO:0043170//GO:0065007//GO:0010468//GO:0032774//GO:0034641//GO:0016070//GO:0034654//GO:0010556//GO:0060255//GO:0018130//GO:0050794//GO:0009058//GO:0006807//GO:0010467//GO:0051179//GO:0090304//GO:0044238//GO:0046483//GO:1903506//GO:0008152//GO:0051252//GO:2001141//GO:1901576//GO:…	cation transport//cellular nitrogen compound biosynthetic process//nucleobase-containing compound metabolic process//organic cyclic compound metabolic process//ion transport//cellular metabolic process//macromolecule biosynthetic process//regulation of nucleobase-containing compound metabolic process//regulation of metabolic process//potassium ion transport//macromolecule metabolic process//biolo…	GO:0044424//GO:0043229//GO:0005623//GO:0005634//GO:0005622//GO:0044464//GO:0043231//GO:0005575//GO:0043227//GO:0043226	intracellular part//intracellular organelle//cell//nucleus//intracellular//cell part//intracellular membrane-bounded organelle//cellular_component//membrane-bounded organelle//organelle	GO:0051287//GO:0005488//GO:0048037//GO:0016616//GO:1901265//GO:0016614//GO:0046872//GO:0000166//GO:0046914//GO:0043169//GO:0008270//GO:0036094//GO:0003674//GO:0043167//GO:0003700//GO:0016491//GO:0003824//GO:1901363//GO:0097159//GO:0050662	NAD binding//binding//cofactor binding//oxidoreductase activity, acting on the CH-OH group of donors, NAD or NADP as acceptor//nucleoside phosphate binding//oxidoreductase activity, acting on CH-OH group of donors//metal ion binding//nucleotide binding//transition metal ion binding//cation binding//zinc ion binding//small molecule binding//molecular_function//ion binding//DNA-binding transcriptio…	K00001 alcohol dehydrogenase [EC:1.1.1.1] | (RefSeq) alcohol dehydrogenase-like 6
183	Novel02709	34.6018	14.3406	5.81405	2.34245	10.1131	101.137	1538.59	-3.9272	5.9447e-28	1.7188e-25	DOWN	394.464	97.9263	2.0101	2.6134e-07	8.4552e-06	UP	417.017	1620.38	-1.9581	1.3722e-12	1.874e-10	DOWN	594.929	1620.64	-1.4458	6.9783e-09	9.9649e-08	DOWN	224.153	551.247	-1.2982	9.2725e-06	0.00015178	DOWN	232.185	1500.41	-2.692	1.5008e-18	5.5245e-16	DOWN	--	--	GO:0016021//GO:0044425//GO:0031224//GO:0016020//GO:0005575	integral component of membrane//membrane part//intrinsic component of membrane//membrane//cellular_component	GO:0046872//GO:0005488//GO:0043169//GO:0046914//GO:0043167//GO:0003674//GO:0008270	metal ion binding//binding//cation binding//transition metal ion binding//ion binding//molecular_function//zinc ion binding	K15382 solute carrier family 50 (sugar transporter) | (RefSeq) bidirectional sugar transporter SWEET12-like
184	Novel02717	118.764	9.72194	37.4984	33.3496	32.1367	1314.34	4824.84	-1.8761	0.0015002	0.010368	DOWN	1169.91	1275.34	-0.12448	0.75226	0.98963	FALSE	1236.33	5066.82	-2.035	0.00025259	0.0032429	DOWN	371.909	5061.69	-3.7666	5.0979e-08	6.0249e-07	DOWN	1345.5	345.205	1.9626	0.007592	0.038683	UP	1395.84	4703.11	-1.7525	0.0016066	0.016767	DOWN	--	--	--	--	--	--	K06966 uncharacterized protein | (RefSeq) cytokinin riboside 5'-monophosphate phosphoribohydrolase LOG1
185	Novel02815	0.523595	2.80307	3.42489	3.7762	3.07325	181.884	25.054	2.8599	5.1091e-09	1.5354e-07	UP	134.601	176.015	-0.38702	0.36278	0.72024	FALSE	142.101	26.2147	2.4385	9.9653e-06	0.00022787	UP	129.117	26.1761	2.3024	9.4843e-06	6.6818e-05	UP	147.369	119.604	0.30117	0.52034	0.78113	FALSE	152.737	24.3819	2.6472	1.2231e-05	0.00031222	UP	--	--	GO:0005575//GO:0016020	cellular_component//membrane	GO:0004888//GO:0004871//GO:0008066//GO:0015075//GO:0022838//GO:0005215//GO:0015276//GO:0060089//GO:0004970//GO:0015267//GO:0003674//GO:0022836//GO:0038023//GO:0022834//GO:0005216//GO:0022857//GO:0005230//GO:0022803	transmembrane signaling receptor activity//obsolete signal transducer activity//glutamate receptor activity//ion transmembrane transporter activity//substrate-specific channel activity//transporter activity//ligand-gated ion channel activity//molecular transducer activity//ionotropic glutamate receptor activity//channel activity//molecular_function//gated channel activity//signaling receptor acti…	K05387 glutamate receptor, ionotropic, plant | (RefSeq) glutamate receptor 2.8-like
186	Novel02824	0.890918	3.20548	3.25858	3.42991	2.9946	118.619	31.5264	1.9117	0.0001896	0.0018598	UP	93.83	114.835	-0.29144	0.55305	0.88362	FALSE	98.9577	33.1847	1.5763	0.0064532	0.041285	UP	106.071	33.1702	1.6771	0.00028245	0.0013695	UP	99.1783	98.2766	0.013176	0.93774	1	FALSE	102.883	30.7541	1.7422	0.0013871	0.014952	UP	--	--	--	--	--	--	no KO assigned | (RefSeq) uncharacterized LOC102600712
187	Novel02842	2.97564	12.0378	9.05272	8.6749	8.65116	326.057	112.627	1.5336	0.00074745	0.0058171	UP	290.205	315.368	-0.11996	0.81957	1	FALSE	306.599	118.296	1.3739	0.0002063	0.0027484	UP	430.404	118.182	1.8647	1.5126e-09	2.4619e-08	UP	298.624	398.788	-0.41729	0.14495	0.34849	FALSE	309.971	109.792	1.4974	7.7524e-05	0.0014799	UP	GO:0071704//GO:0006508//GO:0008152//GO:0008150//GO:0043170//GO:0019538//GO:0044238	organic substance metabolic process//proteolysis//metabolic process//biological_process//macromolecule metabolic process//protein metabolic process//primary metabolic process	--	--	GO:0003674//GO:0004185//GO:0008236//GO:0016787//GO:0070011//GO:0004180//GO:0017171//GO:0003824//GO:0008233//GO:0008238//GO:0070008	molecular_function//serine-type carboxypeptidase activity//serine-type peptidase activity//hydrolase activity//peptidase activity, acting on L-amino acid peptides//carboxypeptidase activity//serine hydrolase activity//catalytic activity//peptidase activity//exopeptidase activity//serine-type exopeptidase activity	K16296 serine carboxypeptidase-like clade I [EC:3.4.16.-] | (RefSeq) serine carboxypeptidase-like 20
188	Novel02878	578.672	15.6277	55.2904	3.2503	40.9978	175.117	32588.8	-7.5399	2.906e-82	8.6544e-78	DOWN	2065.51	169.882	3.6039	1.338e-08	5.688e-07	UP	2180.3	34326.6	-3.9767	1.3568e-52	1.3527e-48	DOWN	822.349	34330.1	-5.3836	2.3919e-88	7.8901e-85	DOWN	2674.35	761.103	1.813	1.1095e-09	5.5611e-08	UP	2773.75	31785	-3.5184	2.1582e-35	8.0439e-32	DOWN	GO:0009987//GO:0008150//GO:0071704//GO:0044262//GO:0044260//GO:0005975//GO:0044264//GO:0008152//GO:0044238//GO:0006073//GO:0005976//GO:0043170//GO:0044042//GO:0044237	cellular process//biological_process//organic substance metabolic process//cellular carbohydrate metabolic process//cellular macromolecule metabolic process//carbohydrate metabolic process//cellular polysaccharide metabolic process//metabolic process//primary metabolic process//cellular glucan metabolic process//polysaccharide metabolic process//macromolecule metabolic process//glucan metabolic p…	GO:0005575//GO:0071944//GO:0044464//GO:0005576//GO:0005618//GO:0005623//GO:0048046//GO:0030312	cellular_component//cell periphery//cell part//extracellular region//cell wall//cell//apoplast//external encapsulating structure	GO:0003824//GO:0016740//GO:0016757//GO:0003674//GO:0004553//GO:0016787//GO:0016762//GO:0016758//GO:0016798	catalytic activity//transferase activity//transferase activity, transferring glycosyl groups//molecular_function//hydrolase activity, hydrolyzing O-glycosyl compounds//hydrolase activity//xyloglucan:xyloglucosyl transferase activity//transferase activity, transferring hexosyl groups//hydrolase activity, acting on glycosyl bonds	K08235 xyloglucan:xyloglucosyl transferase [EC:2.4.1.207] | (RefSeq) xyloglucan endotransglucosylase/hydrolase protein 24-like
189	Novel02950	15.8855	4.36725	5.59044	4.00205	5.02218	212.79	869.855	-2.0313	2.4125e-09	7.6761e-08	DOWN	246.454	206.194	0.25732	0.55769	0.88706	FALSE	259.973	915.328	-1.8159	4.8859e-10	3.8055e-08	DOWN	224.556	915.094	-2.0268	7.2331e-14	2.4541e-12	DOWN	266.404	207.763	0.35867	0.28621	0.54449	FALSE	276.239	848.23	-1.6185	1.2462e-07	5.8152e-06	DOWN	GO:0071702//GO:0046942//GO:0044003//GO:0003333//GO:0034220//GO:0065008//GO:0071705//GO:0019087//GO:0051817//GO:0006810//GO:0051234//GO:0008150//GO:0009987//GO:0016032//GO:0015711//GO:0044403//GO:0006811//GO:0055085//GO:0019048//GO:0051701//GO:0051704//GO:0015849//GO:0044419//GO:0098656//GO:0065007//GO:0035821//GO:0006820//GO:0044764//GO:0006865//GO:0051179//GO:1903825	organic substance transport//carboxylic acid transport//modification by symbiont of host morphology or physiology//amino acid transmembrane transport//ion transmembrane transport//regulation of biological quality//nitrogen compound transport//transformation of host cell by virus//modification of morphology or physiology of other organism involved in symbiotic interaction//transport//establishment…	GO:0016020//GO:0005575//GO:0044425//GO:0016021//GO:0031224	membrane//cellular_component//membrane part//integral component of membrane//intrinsic component of membrane	GO:0015171//GO:0003674//GO:0046943//GO:0022857//GO:0005342//GO:0015075//GO:0008509//GO:0008514//GO:0005215	amino acid transmembrane transporter activity//molecular_function//carboxylic acid transmembrane transporter activity//transmembrane transporter activity//organic acid transmembrane transporter activity//ion transmembrane transporter activity//anion transmembrane transporter activity//organic anion transmembrane transporter activity//transporter activity	--
190	Novel02960	0.317264	3.97959	6.56824	8.89363	4.65068	180.985	6.42589	4.8158	5.2488e-08	1.3015e-06	UP	85.4981	175.003	-1.0334	0.048526	0.21518	FALSE	90.2862	6.73539	3.7447	5.2623e-07	1.8216e-05	UP	77.073	6.72258	3.5191	4.2905e-08	5.1673e-07	UP	119.917	71.3056	0.74994	0.40073	0.67057	FALSE	124.21	6.26274	4.3098	0.002095	0.020514	UP	--	--	--	--	--	--	no KO assigned | (RefSeq) uncharacterized LOC102604739
191	Novel02970	12.8294	0.519301	1.51695	1.63714	3.66509	115.106	936.717	-3.0246	1.6255e-07	3.7038e-06	DOWN	236.601	111.354	1.0873	0.038798	0.1835	FALSE	249.283	989.141	-1.9884	0.00013831	0.0019916	DOWN	34.9941	988.877	-4.8206	4.793e-12	1.2384e-10	DOWN	94.3746	32.3711	1.5437	0.0028604	0.0177	UP	97.8268	915.306	-3.226	1.0921e-07	5.1607e-06	DOWN	GO:0009126//GO:0006163//GO:0042455//GO:0046128//GO:0019438//GO:0015986//GO:0009201//GO:1901657//GO:0015672//GO:0006164//GO:0044249//GO:1901566//GO:0051234//GO:0009199//GO:0098662//GO:0006810//GO:1901564//GO:0008150//GO:0009987//GO:0042451//GO:0006754//GO:0009152//GO:0098655//GO:1901362//GO:0044281//GO:0009163//GO:0009142//GO:0006796//GO:0009260//GO:0019637//GO:0009127//GO:0009144//GO:0009168//GO:…	purine nucleoside monophosphate metabolic process//purine nucleotide metabolic process//ribonucleoside biosynthetic process//purine ribonucleoside metabolic process//aromatic compound biosynthetic process//ATP synthesis coupled proton transport//ribonucleoside triphosphate biosynthetic process//glycosyl compound metabolic process//monovalent inorganic cation transport//purine nucleotide biosynthe…	GO:0098798//GO:0000152//GO:0033177//GO:0098796//GO:0005743//GO:0098800//GO:0043226//GO:0031975//GO:0005740//GO:0005737//GO:1902494//GO:1990234//GO:0005739//GO:0032991//GO:0000151//GO:0044429//GO:0016020//GO:0043227//GO:0005575//GO:0043231//GO:0005680//GO:0016469//GO:0045263//GO:0044444//GO:0005623//GO:0019866//GO:0031967//GO:0044464//GO:0044455//GO:0005622//GO:0005634//GO:0044424//GO:0044425//GO:…	mitochondrial protein complex//nuclear ubiquitin ligase complex//proton-transporting two-sector ATPase complex, proton-transporting domain//membrane protein complex//mitochondrial inner membrane//inner mitochondrial membrane protein complex//organelle//envelope//mitochondrial envelope//cytoplasm//catalytic complex//transferase complex//mitochondrion//protein-containing complex//ubiquitin ligase c…	GO:0003824//GO:0022857//GO:0016740//GO:0008270//GO:0043167//GO:0015077//GO:0003674//GO:0008324//GO:0015075//GO:0022890//GO:0043169//GO:0005515//GO:0005215//GO:0046914//GO:0004842//GO:0019787//GO:0005488//GO:0046872//GO:0015078	catalytic activity//transmembrane transporter activity//transferase activity//zinc ion binding//ion binding//monovalent inorganic cation transmembrane transporter activity//molecular_function//cation transmembrane transporter activity//ion transmembrane transporter activity//inorganic cation transmembrane transporter activity//cation binding//protein binding//transporter activity//transition meta…	no KO assigned | (RefSeq) E3 ubiquitin-protein ligase At1g63170-like
192	Novel03051	0.53078	2.34245	2.22445	1.9892	1.80532	243.6	67.1863	1.8583	7.7553e-06	0.00011623	UP	200.329	235.887	-0.23572	0.56936	0.89351	FALSE	211.7	70.8552	1.5791	0.00021571	0.0028562	UP	275.844	70.9272	1.9594	1.8227e-08	2.3806e-07	UP	240.356	255.322	-0.087145	0.83359	0.9849	FALSE	249.562	65.5122	1.9296	2.9613e-06	9.131e-05	UP	GO:0071704//GO:0008152//GO:0006508//GO:0008150//GO:0043170//GO:0044238//GO:0019538	organic substance metabolic process//metabolic process//proteolysis//biological_process//macromolecule metabolic process//primary metabolic process//protein metabolic process	--	--	GO:0008234//GO:0003674//GO:0004175//GO:0016787//GO:0070011//GO:0097159//GO:1901363//GO:0003676//GO:0003824//GO:0008233//GO:0005488//GO:0004197//GO:0005515	cysteine-type peptidase activity//molecular_function//endopeptidase activity//hydrolase activity//peptidase activity, acting on L-amino acid peptides//organic cyclic compound binding//heterocyclic compound binding//nucleic acid binding//catalytic activity//peptidase activity//binding//cysteine-type endopeptidase activity//protein binding	K11593 eukaryotic translation initiation factor 2C | (RefSeq) protein argonaute 16-like
193	Novel03055	5.12939	121.2	59.0183	28.3549	87.8937	759.239	136.677	2.4738	0.00043226	0.0036875	UP	2112.03	734.07	1.5246	3.4454e-06	8.3342e-05	UP	2226.5	143.316	3.9575	1.5898e-27	2.0674e-24	UP	3084.31	143.299	4.4279	5.6049e-11	1.2006e-09	UP	1377.41	2852.29	-1.0502	0.014611	0.064256	FALSE	1429.28	132.988	3.4259	1.6354e-22	1.2503e-19	UP	GO:1901360//GO:0006139//GO:0044237//GO:0009059//GO:0043170//GO:0006259//GO:0034641//GO:0009058//GO:0006807//GO:0090304//GO:0046483//GO:0044238//GO:0008152//GO:0044260//GO:1901576//GO:0006725//GO:0071704//GO:0034645//GO:0008150//GO:0044249//GO:0006260//GO:0009987	organic cyclic compound metabolic process//nucleobase-containing compound metabolic process//cellular metabolic process//macromolecule biosynthetic process//macromolecule metabolic process//DNA metabolic process//cellular nitrogen compound metabolic process//biosynthetic process//nitrogen compound metabolic process//nucleic acid metabolic process//heterocycle metabolic process//primary metabolic …	--	--	GO:0005488//GO:0003677//GO:0003674//GO:1901363//GO:0003676//GO:0097159	binding//DNA binding//molecular_function//heterocyclic compound binding//nucleic acid binding//organic cyclic compound binding	--
194	Novel03059	1.07561	14.1658	8.0359	8.38943	6.67259	395.287	51.3066	2.9457	9.8398e-05	0.0010598	UP	278.939	382.163	-0.45424	0.42345	0.77733	FALSE	295.011	53.9963	2.4498	3.1479e-07	1.1538e-05	UP	633.061	53.9673	3.5522	1.0723e-28	2.0277e-26	UP	330.922	586.437	-0.82549	0.0025245	0.016037	FALSE	343.637	50.05	2.7794	6.2248e-10	5.113e-08	UP	GO:0044267//GO:0019538//GO:0036211//GO:0006468//GO:0044238//GO:0044237//GO:0006464//GO:0043170//GO:0016310//GO:0008150//GO:0043412//GO:0006796//GO:0009987//GO:0006793//GO:0008152//GO:0044260//GO:0071704	cellular protein metabolic process//protein metabolic process//protein modification process//protein phosphorylation//primary metabolic process//cellular metabolic process//cellular protein modification process//macromolecule metabolic process//phosphorylation//biological_process//macromolecule modification//phosphate-containing compound metabolic process//cellular process//phosphorus metabolic p…	--	--	GO:0004672//GO:0016772//GO:0001882//GO:0000166//GO:0001883//GO:0016773//GO:0004674//GO:0005488//GO:0032559//GO:0032549//GO:0043168//GO:0017076//GO:0097367//GO:1901265//GO:0016740//GO:1901363//GO:0030554//GO:0003824//GO:0097159//GO:0032555//GO:0035639//GO:0032550//GO:0016301//GO:0005524//GO:0032553//GO:0036094//GO:0003674//GO:0043167	protein kinase activity//transferase activity, transferring phosphorus-containing groups//nucleoside binding//nucleotide binding//purine nucleoside binding//phosphotransferase activity, alcohol group as acceptor//protein serine/threonine kinase activity//binding//adenyl ribonucleotide binding//ribonucleoside binding//anion binding//purine nucleotide binding//carbohydrate derivative binding//nucle…	--
195	Novel03144	3.0606	0.375969	0.972844	0.486208	0.630247	39.7306	261.55	-2.7188	1.1671e-06	2.1561e-05	DOWN	46.8874	38.5812	0.2813	0.71634	0.97609	FALSE	49.6288	275.155	-2.471	3.0467e-06	8.2166e-05	DOWN	30.2662	275.422	-3.1859	2.8012e-08	3.5238e-07	DOWN	71.682	27.9602	1.3582	0.018021	0.075512	FALSE	74.4476	254.68	-1.7744	9.3371e-05	0.0017296	DOWN	GO:0008150//GO:0044249//GO:0009987//GO:0006260//GO:0008152//GO:0006725//GO:0034645//GO:0071704//GO:0044260//GO:1901576//GO:0006259//GO:0034641//GO:0090304//GO:0046483//GO:0044238//GO:0009058//GO:0006807//GO:0044237//GO:1901360//GO:0006139//GO:0043170//GO:0009059	biological_process//cellular biosynthetic process//cellular process//DNA replication//metabolic process//cellular aromatic compound metabolic process//cellular macromolecule biosynthetic process//organic substance metabolic process//cellular macromolecule metabolic process//organic substance biosynthetic process//DNA metabolic process//cellular nitrogen compound metabolic process//nucleic acid me…	GO:0061695//GO:1902494//GO:1990234//GO:0042575//GO:0009360//GO:0032991//GO:0005575//GO:0005623//GO:0044464//GO:0005622//GO:0044424	transferase complex, transferring phosphorus-containing groups//catalytic complex//transferase complex//DNA polymerase complex//DNA polymerase III complex//protein-containing complex//cellular_component//cell//cell part//intracellular//intracellular part	GO:0003824//GO:1901363//GO:0003676//GO:0016788//GO:0016740//GO:0097159//GO:0004518//GO:0003887//GO:0016787//GO:0003674//GO:0016779//GO:0034061//GO:0003677//GO:0016772//GO:0008408//GO:0005488//GO:0004527	catalytic activity//heterocyclic compound binding//nucleic acid binding//hydrolase activity, acting on ester bonds//transferase activity//organic cyclic compound binding//nuclease activity//DNA-directed DNA polymerase activity//hydrolase activity//molecular_function//nucleotidyltransferase activity//DNA polymerase activity//DNA binding//transferase activity, transferring phosphorus-containing gro…	K01193 beta-fructofuranosidase [EC:3.2.1.26] | (RefSeq) beta-fructofuranosidase, insoluble isoenzyme CWINV3-like
196	Novel03205	5.65378	25.4792	18.1164	15.5409	18.0753	892.692	331.216	1.4304	1.8101e-05	0.00024448	UP	935.941	864.258	0.11496	0.67187	0.95518	FALSE	988.437	348.349	1.5046	1.5976e-07	6.5278e-06	UP	1403.89	348.523	2.0101	8.7108e-15	3.416e-13	UP	916.011	1299.9	-0.50497	0.043282	0.14671	FALSE	950.902	322.626	1.5594	2.2959e-07	9.9789e-06	UP	GO:0008104//GO:0051179//GO:0015031//GO:0045184//GO:0071702//GO:0033036//GO:0051234//GO:0006810//GO:0008150	protein localization//localization//protein transport//establishment of protein localization//organic substance transport//macromolecule localization//establishment of localization//transport//biological_process	GO:0044425//GO:0016021//GO:0031224//GO:0005575//GO:0016020	membrane part//integral component of membrane//intrinsic component of membrane//cellular_component//membrane	--	--	K19995 secretory carrier-associated membrane protein | (RefSeq) secretory carrier-associated membrane protein 4
197	Novel03290	0.602231	0.03291	0.0516347	0	0.0941731	0	33.2343	#NAME?	4.6502e-07	9.492e-06	DOWN	4.69205	0	Inf	0.21821	0.54871	FALSE	4.91567	34.9645	-2.8304	0.0075542	0.046422	DOWN	1.72393	34.9201	-4.3403	1.4772e-05	9.8774e-05	DOWN	2.39311	1.58488	0.59452	0.88774	1	FALSE	2.49756	32.4389	-3.6991	0.0015386	0.016251	DOWN	--	--	--	--	GO:0005488//GO:0043168//GO:0048037//GO:0016740//GO:1901363//GO:0003824//GO:0097159//GO:0008483//GO:0003674//GO:0016769//GO:0030170//GO:0043167	binding//anion binding//cofactor binding//transferase activity//heterocyclic compound binding//catalytic activity//organic cyclic compound binding//transaminase activity//molecular_function//transferase activity, transferring nitrogenous groups//pyridoxal phosphate binding//ion binding	K00818 acetylornithine aminotransferase [EC:2.6.1.11] | (RefSeq) acetylornithine aminotransferase, mitochondrial
198	Novel03348	32.9107	9.54937	12.9591	10.0287	15.3215	1179.33	3984.93	-1.7566	1.2842e-08	3.6079e-07	DOWN	1641.2	1142.52	0.52253	0.086772	0.31563	FALSE	1732.69	4193.77	-1.2752	2.0087e-07	7.8635e-06	DOWN	1084.62	4194.75	-1.9514	3.1868e-16	1.6145e-14	DOWN	1362.68	1003.89	0.44084	0.068272	0.20449	FALSE	1412.67	3884.14	-1.4592	5.5567e-08	2.8322e-06	DOWN	--	--	--	--	--	--	K06066 CBF1 interacting corepressor | (RefSeq) uncharacterized zinc finger CCHC domain-containing protein At4g19190
199	Novel03359	3.70504	1.01042	1.13387	1.89113	0.901191	152.209	307.772	-1.0158	0.006649	0.034443	DOWN	65.6837	147.263	-1.1648	0.01622	0.097118	FALSE	69.4308	324.734	-2.2256	2.028e-08	1.0738e-06	DOWN	77.7631	324.788	-2.0623	8.9442e-10	1.5358e-08	DOWN	80.9427	71.9982	0.16894	0.7442	0.94044	FALSE	83.9127	300.459	-1.8402	2.6897e-06	8.4066e-05	DOWN	--	--	--	--	--	--	--
200	Novel03372	39.1381	15.1058	17.6082	16.9945	19.981	1162.58	2752.51	-1.2434	4.919e-05	0.00058387	DOWN	1241.5	1125.7	0.14126	0.65071	0.94354	FALSE	1310.47	2898.32	-1.1451	4.5158e-06	0.00011554	DOWN	994.049	2899.04	-1.5442	1.0898e-10	2.2207e-09	DOWN	1077.19	920.148	0.22734	0.40066	0.67053	FALSE	1116.49	2683.68	-1.2652	2.3519e-06	7.484e-05	DOWN	--	--	--	--	--	--	K14684 solute carrier family 25 (mitochondrial phosphate transporter), member 23/24/25/41 | (RefSeq) mitochondrial adenine nucleotide transporter ADNT1-like
201	Novel03387	118.049	59.7945	48.7576	60.957	54.2193	3404.33	6897.7	-1.0187	0.010629	0.049479	DOWN	2771.9	3298.12	-0.25077	0.4283	0.78172	FALSE	2926.77	7280.27	-1.3147	0.00034697	0.0041896	DOWN	3223.45	7278.91	-1.1751	0.0038529	0.013101	DOWN	2449.54	2989.66	-0.28747	0.43355	0.70304	FALSE	2538.41	6737.58	-1.4083	0.00021099	0.0033392	DOWN	--	--	--	--	--	--	no KO assigned | (RefSeq) uncharacterized LOC102582919
202	Novel03393	0.991343	0.0742989	0.151215	0.0659576	0.00826898	2.70438	43.6911	-4.014	2.0793e-05	0.00027485	DOWN	0.342112	2.63438	-2.9449	0.57595	0.898	FALSE	0.361978	46.0222	-6.9903	6.0855e-07	2.052e-05	DOWN	3.08229	46.079	-3.902	2.7751e-06	2.2231e-05	DOWN	5.83546	2.84276	1.0376	0.64358	0.8771	FALSE	6.04666	42.5631	-2.8154	0.0019139	0.019227	DOWN	--	--	--	--	--	--	--
203	Novel03480	20.3303	4.44682	8.21067	6.74531	8.12059	406.976	1260.15	-1.6306	3.9541e-07	8.2694e-06	DOWN	443.323	393.688	0.17131	0.59608	0.91194	FALSE	468.341	1329.04	-1.5047	4.7087e-08	2.2715e-06	DOWN	255.187	1329.32	-2.3811	2.1631e-17	1.2518e-15	DOWN	436.492	236.636	0.88328	0.003074	0.018758	FALSE	452.817	1229.83	-1.4415	8.9312e-07	3.2836e-05	DOWN	--	--	GO:0005576//GO:0005575	extracellular region//cellular_component	GO:0030550//GO:0030548//GO:0098772//GO:0030547//GO:0003674//GO:0030545	acetylcholine receptor inhibitor activity//acetylcholine receptor regulator activity//molecular function regulator//receptor inhibitor activity//molecular_function//receptor regulator activity	--
204	Novel03554	19.9701	96.4799	56.0286	69.0219	57.2225	1244.57	364.762	1.7706	0.0019123	0.012619	UP	921.424	1204.69	-0.38673	0.4418	0.79318	FALSE	973.559	383.324	1.3447	0.00046144	0.0052536	UP	1662.24	383.297	2.1166	1.5558e-16	8.1747e-15	UP	888.095	1539.71	-0.79387	0.00096424	0.0074095	FALSE	922.072	355.351	1.3756	5.7093e-06	0.00016197	UP	--	--	--	--	--	--	--
205	PGSC0003DMG400000075	90.8144	22.3022	28.0218	20.6255	34.0773	976.358	4450.03	-2.1883	3.4841e-12	1.8014e-10	DOWN	1478.95	944.967	0.64624	0.051256	0.22317	FALSE	1559.84	4694.16	-1.5895	2.1813e-08	1.1406e-06	DOWN	1013.86	4694.62	-2.2112	5.2458e-14	1.8173e-12	DOWN	1187.34	938.583	0.33918	0.26014	0.51181	FALSE	1229.96	4343.98	-1.8204	3.088e-10	2.765e-08	DOWN	--	--	--	--	--	--	no KO assigned | (RefSeq) uncharacterized LOC102590352
206	PGSC0003DMG400000099	5.05603	0.414737	1.20792	0.607135	1.74895	64.2553	553.075	-3.1056	8.7283e-16	7.4481e-14	DOWN	171.852	62.2163	1.4658	0.029201	0.14968	FALSE	181.375	582.652	-1.6837	9.8538e-08	4.2645e-06	DOWN	42.3999	582.675	-3.7806	2.7256e-30	5.9939e-28	DOWN	114.343	39.2267	1.5435	0.0012846	0.0093144	UP	118.496	539.515	-2.1868	3.5157e-10	3.0741e-08	DOWN	--	--	--	--	GO:0008270//GO:0005488//GO:0043167//GO:0046872//GO:0043169//GO:0003674//GO:0046914	zinc ion binding//binding//ion binding//metal ion binding//cation binding//molecular_function//transition metal ion binding	no KO assigned | (RefSeq) pentatricopeptide repeat-containing protein At3g57430, chloroplastic
207	PGSC0003DMG400000134	1.50106	0.274881	0.203048	0.647259	0.22382	74.5214	180.049	-1.2727	0.0033544	0.01986	DOWN	23.5697	72.3372	-1.6178	0.039185	0.18486	FALSE	24.9575	189.446	-2.9242	9.0488e-09	5.2348e-07	DOWN	30.9026	189.44	-2.6159	2.2583e-10	4.3535e-09	DOWN	20.7318	28.6275	-0.46555	0.57457	0.8262	FALSE	21.5813	175.523	-3.0238	4.6091e-09	3.0271e-07	DOWN	GO:0006508//GO:0008150//GO:0008152//GO:0019538//GO:0043170//GO:0044238//GO:0071704	proteolysis//biological_process//metabolic process//protein metabolic process//macromolecule metabolic process//primary metabolic process//organic substance metabolic process	--	--	GO:0017171//GO:0016787//GO:0004175//GO:0003824//GO:0004252//GO:0003674//GO:0008233//GO:0070011//GO:0008236	serine hydrolase activity//hydrolase activity//endopeptidase activity//catalytic activity//serine-type endopeptidase activity//molecular_function//peptidase activity//peptidase activity, acting on L-amino acid peptides//serine-type peptidase activity	no KO assigned | (RefSeq) subtilisin-like protease SBT1.1
208	PGSC0003DMG400000156	79.8911	19.687	27.2741	21.8179	20.492	2417.94	9165.87	-1.9225	5.164e-09	1.5472e-07	DOWN	2079.98	2339.95	-0.1699	0.503	0.84601	FALSE	2193.73	9672.08	-2.1404	4.5644e-09	2.7861e-07	DOWN	2086.43	9672.25	-2.2128	1.6561e-09	2.6749e-08	DOWN	2702.32	1933.81	0.48276	0.17381	0.39327	FALSE	2800.38	8950.02	-1.6763	8.0443e-07	3.0057e-05	DOWN	--	--	--	--	--	--	no KO assigned | (RefSeq) uncharacterized LOC102583787
209	PGSC0003DMG400000234	53.793	15.8841	13.1619	13.8419	15.2635	1612.74	6594.14	-2.0317	3.4837e-08	8.9671e-07	DOWN	1638.98	1564.19	0.067384	0.91999	1	FALSE	1730.38	6957.7	-2.0075	4.3296e-09	2.6755e-07	DOWN	1802.19	6957.41	-1.9488	7.7333e-09	1.0948e-07	DOWN	1385.68	1669.14	-0.26852	0.2279	0.46994	FALSE	1436.63	6438.92	-2.1641	4.2433e-10	3.5944e-08	DOWN	--	--	GO:0044425//GO:0016020//GO:0005575//GO:0016021//GO:0031224	membrane part//membrane//cellular_component//integral component of membrane//intrinsic component of membrane	--	--	no KO assigned | (RefSeq) uncharacterized LOC102587530
210	PGSC0003DMG400000236	196.399	90.8016	82.2257	70.0473	103.418	2945.84	8573.56	-1.5412	7.3087e-05	0.00082199	DOWN	3962.33	2850.94	0.47491	0.11404	0.37535	FALSE	4179.74	9050.41	-1.1146	0.0024893	0.019998	DOWN	3665.6	9049.19	-1.3037	0.00057886	0.0025509	DOWN	3075.1	3392.33	-0.14165	0.53198	0.79148	FALSE	3187.03	8374.82	-1.3938	0.00037742	0.0053183	DOWN	--	--	GO:0044424//GO:0005789//GO:0044425//GO:0005737//GO:0098588//GO:0016020//GO:0043227//GO:0031090//GO:0044446//GO:0043229//GO:0016021//GO:0044422//GO:0043231//GO:0005575//GO:0044444//GO:0005623//GO:0044432//GO:0005783//GO:0043226//GO:0044464//GO:0012505//GO:0042175//GO:0031224//GO:0005622	intracellular part//endoplasmic reticulum membrane//membrane part//cytoplasm//bounding membrane of organelle//membrane//membrane-bounded organelle//organelle membrane//intracellular organelle part//intracellular organelle//integral component of membrane//organelle part//intracellular membrane-bounded organelle//cellular_component//cytoplasmic part//cell//endoplasmic reticulum part//endoplasmic re…	--	--	no KO assigned | (RefSeq) ORM1-like protein 3
211	PGSC0003DMG400000286	53.4253	156.124	115.881	144.388	128.205	8493.71	3180.11	1.4173	3.241e-05	0.00040385	UP	6759.98	8218.46	-0.28185	0.37169	0.7287	FALSE	7138.74	3342.13	1.0949	5.2711e-06	0.0001316	UP	8771.58	3342.27	1.392	2.4931e-09	3.8812e-08	UP	5990.5	8122.25	-0.4392	0.050619	0.16421	FALSE	6217.2	3097.8	1.005	0.00013649	0.0023565	UP	GO:0044271//GO:0043043//GO:0044237//GO:0008152//GO:1901576//GO:0044260//GO:0009059//GO:0043604//GO:0043170//GO:0034645//GO:0006518//GO:0071704//GO:0034641//GO:0044249//GO:1901566//GO:0008150//GO:1901564//GO:0044267//GO:0010467//GO:0043603//GO:0006807//GO:0019538//GO:0009058//GO:0009987//GO:0044238//GO:0006412	cellular nitrogen compound biosynthetic process//peptide biosynthetic process//cellular metabolic process//metabolic process//organic substance biosynthetic process//cellular macromolecule metabolic process//macromolecule biosynthetic process//amide biosynthetic process//macromolecule metabolic process//cellular macromolecule biosynthetic process//peptide metabolic process//organic substance meta…	GO:0043232//GO:0005840//GO:0044424//GO:0005737//GO:0043229//GO:0005575//GO:0032991//GO:0043228//GO:0044444//GO:0005623//GO:0005622//GO:0044464//GO:0043226	intracellular non-membrane-bounded organelle//ribosome//intracellular part//cytoplasm//intracellular organelle//cellular_component//protein-containing complex//non-membrane-bounded organelle//cytoplasmic part//cell//intracellular//cell part//organelle	GO:0003674//GO:0003735//GO:0005198	molecular_function//structural constituent of ribosome//structural molecule activity	K02983 small subunit ribosomal protein S30e | (RefSeq) 40S ribosomal protein S30
212	PGSC0003DMG400000288	170.352	64.8421	44.7372	42.7667	54.0429	3995.96	16490	-2.045	7.0348e-11	2.9179e-09	DOWN	4597.99	3867.97	0.24943	0.41723	0.77152	FALSE	4850.11	17395	-1.8426	5.5163e-09	3.3203e-07	DOWN	5815.53	17392.1	-1.5805	1.1284e-07	1.238e-06	DOWN	3727.86	5386.23	-0.53093	0.013425	0.060172	FALSE	3864.35	16101.6	-2.0589	2.3027e-10	2.1591e-08	DOWN	GO:0043171//GO:0034641//GO:1901564//GO:0008150//GO:0043603//GO:1901575//GO:0006807//GO:0019538//GO:0009056//GO:0009987//GO:0044238//GO:0044248//GO:0006790//GO:0006751//GO:0006508//GO:0044237//GO:0006575//GO:1901565//GO:0008152//GO:0044273//GO:0042219//GO:0043170//GO:0006518//GO:0071704//GO:0006749	peptide catabolic process//cellular nitrogen compound metabolic process//organonitrogen compound metabolic process//biological_process//cellular amide metabolic process//organic substance catabolic process//nitrogen compound metabolic process//protein metabolic process//catabolic process//cellular process//primary metabolic process//cellular catabolic process//sulfur compound metabolic process//g…	GO:0031224//GO:0044425//GO:0016021//GO:0005575//GO:0016020	intrinsic component of membrane//membrane part//integral component of membrane//cellular_component//membrane	GO:0003824//GO:0008238//GO:0070011//GO:0016787//GO:0008233//GO:0036374//GO:0003674//GO:0008242	catalytic activity//exopeptidase activity//peptidase activity, acting on L-amino acid peptides//hydrolase activity//peptidase activity//glutathione hydrolase activity//molecular_function//omega peptidase activity	K18592 gamma-glutamyltranspeptidase / glutathione hydrolase / leukotriene-C4 hydrolase [EC:2.3.2.2 3.4.19.13 3.4.19.14] | (RefSeq) gamma-glutamyltranspeptidase 3
213	PGSC0003DMG400000292	1684.37	481.169	437.564	135.463	585.407	3113.63	40046.4	-3.685	1.4612e-29	5.3724e-27	DOWN	12210.7	3016.96	2.017	2.7224e-11	1.8554e-09	UP	12887	42170.5	-1.7103	9.5057e-13	1.3411e-10	DOWN	10693.5	42170.4	-1.9795	1.4803e-17	8.7791e-16	DOWN	9060.32	9899.26	-0.12776	0.52646	0.78616	FALSE	9391.35	39056.9	-2.0562	3.3095e-15	7.77e-13	DOWN	--	--	--	--	--	--	--
214	PGSC0003DMG400000295	20.3201	1.77918	8.8747	1.51873	6.70962	249.268	3465.54	-3.7973	8.0206e-29	2.5963e-26	DOWN	1031.69	241.619	2.0942	0.010417	0.069919	FALSE	1088.96	3649.97	-1.7449	1.535e-12	2.0588e-10	DOWN	283.921	3650.97	-3.6847	3.0816e-45	1.8297e-42	DOWN	1301.21	262.79	2.3079	5.8784e-06	0.00010366	UP	1348.9	3379.25	-1.3249	1.862e-06	6.0478e-05	DOWN	GO:0008152//GO:0046939//GO:0009144//GO:0044237//GO:0006753//GO:0042278//GO:0006793//GO:0009141//GO:0032787//GO:0072524//GO:0042592//GO:0006139//GO:1901360//GO:0016310//GO:0006725//GO:0019362//GO:0006096//GO:0044262//GO:0009117//GO:0042593//GO:0071704//GO:0048878//GO:0009123//GO:0009132//GO:0046034//GO:0055086//GO:0016052//GO:0005975//GO:0046496//GO:0065008//GO:0009161//GO:0006732//GO:0019752//GO:…	metabolic process//nucleotide phosphorylation//purine nucleoside triphosphate metabolic process//cellular metabolic process//nucleoside phosphate metabolic process//purine nucleoside metabolic process//phosphorus metabolic process//nucleoside triphosphate metabolic process//monocarboxylic acid metabolic process//pyridine-containing compound metabolic process//homeostatic process//nucleobase-conta…	GO:0044425//GO:0016020//GO:0005575//GO:0016021//GO:0005623//GO:0031224	membrane part//membrane//cellular_component//integral component of membrane//cell//intrinsic component of membrane	GO:0005524//GO:0043168//GO:0032553//GO:0016301//GO:0032550//GO:0032559//GO:0032549//GO:0005488//GO:0032555//GO:0035639//GO:1901265//GO:0043167//GO:0048029//GO:0019200//GO:0004396//GO:0097367//GO:0036094//GO:0003674//GO:0005536//GO:0017076//GO:0001883//GO:0030554//GO:0003824//GO:1901363//GO:0000166//GO:0016740//GO:0016772//GO:0001882//GO:0030246//GO:0097159//GO:0016773	ATP binding//anion binding//ribonucleotide binding//kinase activity//purine ribonucleoside binding//adenyl ribonucleotide binding//ribonucleoside binding//binding//purine ribonucleotide binding//purine ribonucleoside triphosphate binding//nucleoside phosphate binding//ion binding//monosaccharide binding//carbohydrate kinase activity//hexokinase activity//carbohydrate derivative binding//small mol…	no KO assigned | (RefSeq) receptor-like protein kinase 5
215	PGSC0003DMG400000312	53.617	14.6435	13.2346	18.3685	17.3565	1252.71	3816.02	-1.607	0.0054676	0.029575	DOWN	1081.83	1212.29	-0.16427	0.53043	0.86777	FALSE	1140.95	4032.38	-1.8214	0.0027381	0.021546	DOWN	958.139	4031.31	-2.0729	0.001026	0.004192	DOWN	803.231	887.061	-0.14322	0.56401	0.81819	FALSE	832.328	3730.29	-2.1641	0.00079929	0.0098076	DOWN	--	--	--	--	--	--	no KO assigned | (RefSeq) uncharacterized LOC102593492
216	PGSC0003DMG400000321	3.94112	22.7704	30.1719	12.3034	17.8322	927.473	306.515	1.5973	1.152e-06	2.1323e-05	UP	1217.83	897.645	0.4401	0.14455	0.43377	FALSE	1286.7	323.226	1.9931	1.1254e-12	1.5656e-10	UP	1641.43	323.1	2.3449	1.6981e-14	6.2704e-13	UP	2037.98	1521.54	0.42161	0.37405	0.64188	FALSE	2112.06	299.308	2.8189	8.1758e-06	0.00022222	UP	GO:0019438//GO:0008150//GO:0044249//GO:1901362//GO:0009987//GO:0055114//GO:0009058//GO:0009699//GO:0009698//GO:0008152//GO:0044237//GO:1901360//GO:0044550//GO:0006725//GO:0071704//GO:1901576//GO:0019748	aromatic compound biosynthetic process//biological_process//cellular biosynthetic process//organic cyclic compound biosynthetic process//cellular process//oxidation-reduction process//biosynthetic process//phenylpropanoid biosynthetic process//phenylpropanoid metabolic process//metabolic process//cellular metabolic process//organic cyclic compound metabolic process//secondary metabolite biosynthe…	--	--	GO:0003824//GO:0016620//GO:0016491//GO:0004030//GO:0016903//GO:0050269//GO:0003674	catalytic activity//oxidoreductase activity, acting on the aldehyde or oxo group of donors, NAD or NADP as acceptor//oxidoreductase activity//aldehyde dehydrogenase [NAD(P)+] activity//oxidoreductase activity, acting on the aldehyde or oxo group of donors//coniferyl-aldehyde dehydrogenase activity//molecular_function	K12355 coniferyl-aldehyde dehydrogenase [EC:1.2.1.68] | (RefSeq) aldehyde dehydrogenase family 2 member C4-like
217	PGSC0003DMG400000335	0.102186	0.924454	3.41987	0.827875	2.1553	60.0475	7.70021	2.9631	0.0016445	0.011161	UP	139.627	57.9818	1.2679	0.0097616	0.066575	FALSE	147.302	8.15717	4.1746	1.2673e-11	1.3833e-09	UP	62.8833	8.15307	2.9473	0.0063237	0.019985	UP	217.849	58.4382	1.8983	0.0015564	0.010883	UP	225.558	7.54013	4.9028	1.614e-10	1.5778e-08	UP	GO:0055114//GO:0006807//GO:0046483//GO:0009987//GO:0009308//GO:0008150//GO:1901564//GO:0065007//GO:0065008//GO:0071704//GO:0009690//GO:0034754//GO:0006725//GO:0010817//GO:0042445//GO:0044237//GO:0008152	oxidation-reduction process//nitrogen compound metabolic process//heterocycle metabolic process//cellular process//amine metabolic process//biological_process//organonitrogen compound metabolic process//biological regulation//regulation of biological quality//organic substance metabolic process//cytokinin metabolic process//cellular hormone metabolic process//cellular aromatic compound metabolic …	--	--	GO:0005515//GO:0050660//GO:0050662//GO:0097159//GO:0046983//GO:0016491//GO:0019139//GO:0000166//GO:1901363//GO:0016645//GO:0003824//GO:0003674//GO:0048037//GO:0036094//GO:0043167//GO:1901265//GO:0016614//GO:0005488//GO:0043168	protein binding//flavin adenine dinucleotide binding//coenzyme binding//organic cyclic compound binding//protein dimerization activity//oxidoreductase activity//cytokinin dehydrogenase activity//nucleotide binding//heterocyclic compound binding//oxidoreductase activity, acting on the CH-NH group of donors//catalytic activity//molecular_function//cofactor binding//small molecule binding//ion bindi…	K00279 cytokinin dehydrogenase [EC:1.5.99.12] | (RefSeq) cytokinin oxidase/dehydrogenase 2
218	PGSC0003DMG400000339	592.277	16.4566	19.6148	161.319	22.2871	14026.2	54257.9	-1.9517	0.0090371	0.043677	DOWN	1777.25	13585.8	-2.9344	6.0194e-18	1.0279e-15	DOWN	1875.14	57377.7	-4.9354	2.1992e-06	6.2764e-05	DOWN	1376.71	57359.5	-5.3807	5.2536e-07	5.0038e-06	DOWN	1549.28	1276.31	0.27962	0.73739	0.93618	FALSE	1604.29	53065.3	-5.0478	1.2077e-06	4.2066e-05	DOWN	GO:0008150//GO:0044238//GO:0008152//GO:0071704//GO:0005975	biological_process//primary metabolic process//metabolic process//organic substance metabolic process//carbohydrate metabolic process	--	--	GO:0003824//GO:0004565//GO:0004553//GO:0015925//GO:0016798//GO:0016787//GO:0003674	catalytic activity//beta-galactosidase activity//hydrolase activity, hydrolyzing O-glycosyl compounds//galactosidase activity//hydrolase activity, acting on glycosyl bonds//hydrolase activity//molecular_function	no KO assigned | (RefSeq) beta-galactosidase-like
219	PGSC0003DMG400000342	15.0034	4.66288	8.05633	5.62271	7.88091	612.365	1674.8	-1.4515	3.8411e-06	6.2611e-05	DOWN	780.319	592.777	0.39657	0.22194	0.55507	FALSE	823.781	1763.02	-1.0977	2.0738e-05	0.00041853	DOWN	487.673	1763.52	-1.8545	9.7251e-14	3.2624e-12	DOWN	776.574	451.641	0.78195	0.0022589	0.014669	FALSE	805.61	1632.6	-1.019	0.00028	0.0041818	DOWN	GO:0006839//GO:0051503//GO:1901642//GO:1990559//GO:0051649//GO:0034220//GO:0015748//GO:1901679//GO:0071106//GO:0015858//GO:0055085//GO:0006862//GO:0015711//GO:0051181//GO:0051641//GO:0015868//GO:0071702//GO:0006811//GO:0046907//GO:0051179//GO:0051182//GO:1901264//GO:0009987//GO:0006820//GO:0015931//GO:0072530//GO:0098656//GO:0015859//GO:0006810//GO:0051234//GO:0008150//GO:0015880//GO:0015865//GO:…	mitochondrial transport//adenine nucleotide transport//nucleoside transmembrane transport//mitochondrial coenzyme A transmembrane transport//establishment of localization in cell//ion transmembrane transport//organophosphate ester transport//nucleotide transmembrane transport//adenosine 3',5'-bisphosphate transmembrane transport//nucleoside transport//transmembrane transport//nucleotide transport…	GO:0016021//GO:0044422//GO:0044446//GO:0043229//GO:0005575//GO:0043231//GO:0005739//GO:0044429//GO:0016020//GO:0031090//GO:0043227//GO:0031966//GO:0044424//GO:0005737//GO:0044425//GO:0005622//GO:0044464//GO:0043226//GO:0031224//GO:0031975//GO:0005740//GO:0031967//GO:0005743//GO:0044444//GO:0005623//GO:0019866	integral component of membrane//organelle part//intracellular organelle part//intracellular organelle//cellular_component//intracellular membrane-bounded organelle//mitochondrion//mitochondrial part//membrane//organelle membrane//membrane-bounded organelle//mitochondrial membrane//intracellular part//cytoplasm//membrane part//intracellular//cell part//organelle//intrinsic component of membrane//e…	GO:0003674//GO:1901505//GO:0071077//GO:0015605//GO:0051184//GO:0000295//GO:0015932//GO:0015216//GO:0005337//GO:0005215//GO:0008509//GO:0015211//GO:0051185//GO:0015215//GO:0008514//GO:0022857//GO:0015228//GO:0005346//GO:0015075	molecular_function//carbohydrate derivative transmembrane transporter activity//adenosine 3',5'-bisphosphate transmembrane transporter activity//organophosphate ester transmembrane transporter activity//cofactor transmembrane transporter activity//adenine nucleotide transmembrane transporter activity//nucleobase-containing compound transmembrane transporter activity//purine nucleotide transmembra…	K15084 solute carrier family 25 (mitochondrial carrier protein), member 16 | (RefSeq) graves disease carrier protein homolog
220	PGSC0003DMG400000399	10.9857	3.16525	5.16226	5.4882	4.61609	507.598	1055.32	-1.0559	0.0012218	0.008736	DOWN	391.123	491.552	-0.32972	0.30012	0.65308	FALSE	412.896	1113.17	-1.4308	8.0172e-07	2.6175e-05	DOWN	282.021	1112.99	-1.9806	1.4338e-10	2.8453e-09	DOWN	424.51	261.098	0.70121	0.01562	0.067694	FALSE	440.33	1030.42	-1.2266	4.3584e-05	0.00091906	DOWN	--	--	--	--	--	--	no KO assigned | (RefSeq) uncharacterized LOC102594561
221	PGSC0003DMG400000411	60.8264	8.73147	6.38986	8.17937	7.92499	731.465	5683.88	-2.958	5.5742e-06	8.7142e-05	DOWN	643.754	708.179	-0.13761	0.65685	0.94776	FALSE	679.672	6005.04	-3.1433	4.7253e-06	0.00012018	DOWN	750.885	6003.73	-2.9992	8.686e-06	6.1638e-05	DOWN	511.893	694.896	-0.44095	0.092379	0.25419	FALSE	530.484	5555.32	-3.3885	1.2131e-06	4.2208e-05	DOWN	GO:0000271//GO:0044085//GO:0044249//GO:0010413//GO:0034637//GO:0016051//GO:0008150//GO:0070592//GO:0070589//GO:0009987//GO:0044238//GO:0010410//GO:0005976//GO:0071554//GO:0071840//GO:0045491//GO:0009832//GO:0010383//GO:0033692//GO:0009058//GO:0010417//GO:0044264//GO:0044237//GO:0045492//GO:0008152//GO:0044036//GO:0044038//GO:0043170//GO:0034645//GO:0071704//GO:0044262//GO:0009834//GO:0005975//GO:…	polysaccharide biosynthetic process//cellular component biogenesis//cellular biosynthetic process//glucuronoxylan metabolic process//cellular carbohydrate biosynthetic process//carbohydrate biosynthetic process//biological_process//cell wall polysaccharide biosynthetic process//cellular component macromolecule biosynthetic process//cellular process//primary metabolic process//hemicellulose metabo…	GO:0044444//GO:0005623//GO:0043226//GO:0044464//GO:0012505//GO:0031224//GO:0005622//GO:0044424//GO:0044425//GO:0005737//GO:0005794//GO:0016020//GO:0043227//GO:0043229//GO:0016021//GO:0043231//GO:0005575	cytoplasmic part//cell//organelle//cell part//endomembrane system//intrinsic component of membrane//intracellular//intracellular part//membrane part//cytoplasm//Golgi apparatus//membrane//membrane-bounded organelle//intracellular organelle//integral component of membrane//intracellular membrane-bounded organelle//cellular_component	--	--	K20889 probable glucuronoxylan glucuronosyltransferase IRX7 [EC2.4.1.-] | (RefSeq) probable glucuronoxylan glucuronosyltransferase IRX7
222	PGSC0003DMG400000412	7.76994	1.06218	2.82697	2.43459	3.10213	204.429	675.935	-1.7253	6.764e-07	1.3192e-05	DOWN	241.705	198.102	0.28701	0.53855	0.87406	FALSE	254.929	711.943	-1.4817	7.0251e-07	2.332e-05	DOWN	86.1602	711.768	-3.0463	6.9776e-24	8.5955e-22	DOWN	212.23	79.8579	1.4101	0.00017247	0.0017838	UP	220.034	659.487	-1.5836	1.0774e-06	3.8064e-05	DOWN	--	--	GO:0016020//GO:0016021//GO:0005575//GO:0044425//GO:0031224	membrane//integral component of membrane//cellular_component//membrane part//intrinsic component of membrane	--	--	no KO assigned | (RefSeq) protein NUCLEAR FUSION DEFECTIVE 4
223	PGSC0003DMG400000418	16.4429	2.05905	2.81106	0.710091	3.81681	31.6564	755.832	-4.5775	7.8156e-15	5.9529e-13	DOWN	156.183	30.5919	2.352	0.0061669	0.046996	UP	164.881	798.113	-2.2752	4.2053e-06	0.0001088	DOWN	87.2108	798.225	-3.1942	2.7022e-09	4.1718e-08	DOWN	110.528	80.8612	0.45089	0.29461	0.55442	FALSE	114.556	738.227	-2.688	7.1847e-08	3.5764e-06	DOWN	--	--	--	--	GO:1901363//GO:0003676//GO:0097159//GO:0005488//GO:0003674	heterocyclic compound binding//nucleic acid binding//organic cyclic compound binding//binding//molecular_function	no KO assigned | (RefSeq) zinc finger protein ZAT5
224	PGSC0003DMG400000420	14.0585	102.756	41.0096	50.4869	57.0157	1435.97	411.449	1.8032	1.7764e-05	0.00024057	UP	1460.63	1392.21	0.069214	0.83318	1	FALSE	1545.5	432.538	1.8372	0.0041315	0.029611	UP	2834.98	432.461	2.7127	1.1429e-26	1.8581e-24	UP	1032.21	2624.35	-1.3462	2.4821e-08	8.5126e-07	DOWN	1072.17	400.961	1.419	0.0024861	0.023414	UP	--	--	GO:0044424//GO:0043232//GO:0043227//GO:0005694//GO:0032991//GO:0005575//GO:0043231//GO:0044422//GO:0044815//GO:0000786//GO:0044446//GO:0043229//GO:0005623//GO:0043228//GO:0044427//GO:0044464//GO:0000785//GO:0043226//GO:0032993//GO:0005622//GO:0005634	intracellular part//intracellular non-membrane-bounded organelle//membrane-bounded organelle//chromosome//protein-containing complex//cellular_component//intracellular membrane-bounded organelle//organelle part//DNA packaging complex//nucleosome//intracellular organelle part//intracellular organelle//cell//non-membrane-bounded organelle//chromosomal part//cell part//chromatin//organelle//protein-…	GO:0046982//GO:0005488//GO:0003674//GO:0003677//GO:0003676//GO:1901363//GO:0046983//GO:0097159//GO:0005515	protein heterodimerization activity//binding//molecular_function//DNA binding//nucleic acid binding//heterocyclic compound binding//protein dimerization activity//organic cyclic compound binding//protein binding	K11252 histone H2B | (RefSeq) histone H2B.2
225	PGSC0003DMG400000433	5.41173	24.1788	15.0252	14.6234	13.4803	1081.96	409.668	1.4011	1.5671e-05	0.00021529	UP	890.171	1046.81	-0.23385	0.52059	0.85926	FALSE	940.419	431.518	1.1239	0.00063524	0.0067927	UP	1707.11	431.286	1.9848	4.0376e-15	1.6742e-13	UP	968.382	1581.7	-0.70783	0.031603	0.1159	FALSE	1006.05	399.837	1.3312	0.005015	0.039653	UP	--	--	--	--	GO:0050662//GO:0003824//GO:0048037//GO:0003674//GO:0005488	coenzyme binding//catalytic activity//cofactor binding//molecular_function//binding	K12449 UDP-apiose/xylose synthase | (RefSeq) UDP-D-apiose/UDP-D-xylose synthase 2
226	PGSC0003DMG400000519	1.10235	7.09057	25.1566	10.2415	12.1958	479.92	53.4157	3.1675	1.216e-05	0.00017228	UP	514.371	463.958	0.14882	0.64419	0.93976	FALSE	543.178	56.4528	3.2663	1.9895e-19	8.2644e-17	UP	315.231	56.3623	2.4836	0.0015994	0.0061531	UP	1042.18	292.15	1.8348	6.3152e-06	0.00011013	UP	1080.21	52.2944	4.3685	9.9074e-20	4.8428e-17	UP	GO:0008150//GO:0044238//GO:0008152//GO:0005975//GO:0071704	biological_process//primary metabolic process//metabolic process//carbohydrate metabolic process//organic substance metabolic process	--	--	GO:0003824//GO:0016787//GO:0016798//GO:0004553//GO:0003674	catalytic activity//hydrolase activity//hydrolase activity, acting on glycosyl bonds//hydrolase activity, hydrolyzing O-glycosyl compounds//molecular_function	no KO assigned | (RefSeq) glucan endo-1,3-beta-glucosidase, acidic isoform GI9-like
227	PGSC0003DMG400000570	34.3348	4.96768	12.01	3.95313	12.4422	236.035	2071.03	-3.1333	2.7466e-07	5.9259e-06	DOWN	676.128	228.448	1.5654	0.00011227	0.0017402	UP	714.717	2175.18	-1.6057	0.00086796	0.0087289	DOWN	283.289	2176.31	-2.9415	5.5673e-07	5.2797e-06	DOWN	623.42	262.501	1.2479	0.072404	0.21316	FALSE	647.103	2015.68	-1.6392	0.0036342	0.031192	DOWN	--	--	GO:0044425//GO:0016021//GO:0005575//GO:0016020//GO:0031224	membrane part//integral component of membrane//cellular_component//membrane//intrinsic component of membrane	--	--	no KO assigned | (RefSeq) membrane protein of ER body-like protein
228	PGSC0003DMG400000606	12.4566	2.71151	3.01922	6.18025	2.96746	396.633	831.159	-1.0673	0.0012606	0.0089642	DOWN	175.913	384.103	-1.1266	0.0017958	0.017627	DOWN	185.768	877.059	-2.2392	3.0953e-09	1.9739e-07	DOWN	167.618	877.393	-2.388	1.939e-10	3.7772e-09	DOWN	170.574	155.098	0.13721	0.65336	0.88323	FALSE	177.157	811.272	-2.1952	2.3714e-09	1.6598e-07	DOWN	--	--	--	--	--	--	no KO assigned | (RefSeq) F-box protein At5g49610-like
229	PGSC0003DMG400000637	7.51033	21.3676	20.0457	16.0443	27.9293	618.878	296.341	1.0624	0.0016504	0.011199	UP	973.051	599.137	0.69963	0.024102	0.13053	FALSE	1028.66	311.768	1.7222	2.0386e-09	1.3519e-07	UP	790.858	311.82	1.3427	5.2421e-07	4.9976e-06	UP	685.009	732.899	-0.097492	0.71322	0.92165	FALSE	710.677	288.81	1.2991	3.1401e-05	0.00069977	UP	--	--	--	--	--	--	no KO assigned | (RefSeq) protein LURP-one-related 5
230	PGSC0003DMG400000691	0.161922	2.86957	2.72417	1.33961	3.89786	121.293	14.602	3.0543	9.3823e-07	1.7809e-05	UP	317.572	117.44	1.4352	0.0010707	0.011647	UP	334.769	15.2826	4.4532	5.8504e-13	8.5355e-11	UP	249.538	15.2844	4.0291	2.5922e-07	2.6346e-06	UP	216.651	230.668	-0.090443	0.87086	1	FALSE	224.942	14.1888	3.9867	3.8545e-15	8.9299e-13	UP	GO:0055085//GO:0008150//GO:0006810//GO:0051234//GO:0009987//GO:0051179	transmembrane transport//biological_process//transport//establishment of localization//cellular process//localization	GO:0044425//GO:0016020//GO:0005575//GO:0016021//GO:0031224	membrane part//membrane//cellular_component//integral component of membrane//intrinsic component of membrane	GO:0003674//GO:0005215	molecular_function//transporter activity	K14611 solute carrier family 23 (nucleobase transporter), member 1/2 | (RefSeq) nucleobase-ascorbate transporter 1
231	PGSC0003DMG400000706	84.3788	19.89	22.5563	13.6933	30.347	1101.75	7041.26	-2.676	3.7642e-17	3.7492e-15	DOWN	2233.73	1066.85	1.0661	0.0005047	0.0061977	UP	2357.03	7425.47	-1.6555	1.7662e-11	1.86e-09	DOWN	1541.84	7424.98	-2.2677	1.9669e-17	1.1472e-15	DOWN	1619.52	1427.14	0.18244	0.4213	0.69154	FALSE	1678.29	6873.54	-2.0341	8.5375e-14	1.5522e-11	DOWN	--	--	--	--	--	--	no KO assigned | (RefSeq) BTB/POZ domain-containing protein At3g05675-like
232	PGSC0003DMG400000723	0.235631	1.23476	1.31322	1.86591	0.974597	174.215	22.9952	2.9215	1.8143e-08	4.9436e-07	UP	80.8478	168.465	-1.0592	0.025653	0.13676	FALSE	85.3967	24.3401	1.8108	0.002542	0.02034	UP	109.692	24.2926	2.1749	3.7093e-06	2.8882e-05	UP	107.198	101.611	0.077216	0.82464	0.98121	FALSE	111.285	22.5411	2.3036	2.8876e-05	0.00065574	UP	GO:0009987//GO:0016043//GO:0071840//GO:0006996//GO:0007010//GO:0008150	cellular process//cellular component organization//cellular component organization or biogenesis//organelle organization//cytoskeleton organization//biological_process	GO:0031224//GO:0016020//GO:0016021//GO:0005575//GO:0044425	intrinsic component of membrane//membrane//integral component of membrane//cellular_component//membrane part	GO:0005515//GO:0003674//GO:0008092//GO:0003779//GO:0005488	protein binding//molecular_function//cytoskeletal protein binding//actin binding//binding	K17261 adenylyl cyclase-associated protein | (RefSeq) cyclase-associated protein 1
233	PGSC0003DMG400000736	8.68196	36.3252	19.3992	29.6758	21.1498	2008.93	604.143	1.7335	4.1817e-08	1.0536e-06	UP	1301.03	1946.44	-0.58119	0.053487	0.22953	FALSE	1374.25	635.646	1.1124	3.2536e-05	0.00060143	UP	2374.78	635.807	1.9011	1.6009e-14	5.9471e-13	UP	1168.13	2198.27	-0.91217	0.00010161	0.0011424	FALSE	1212.37	588.764	1.0421	0.00032415	0.0046918	UP	GO:0044283//GO:0034654//GO:0019438//GO:0009396//GO:0006732//GO:1901607//GO:0051188//GO:0009130//GO:0072527//GO:0019752//GO:0018130//GO:1901135//GO:0008150//GO:1901564//GO:0009165//GO:0046654//GO:0006544//GO:0006760//GO:0009069//GO:0034641//GO:0006221//GO:0009219//GO:1901566//GO:0044249//GO:0090407//GO:0019692//GO:0009108//GO:0051186//GO:1901293//GO:1901362//GO:0044281//GO:0043436//GO:0046483//GO:…	small molecule biosynthetic process//nucleobase-containing compound biosynthetic process//aromatic compound biosynthetic process//folic acid-containing compound biosynthetic process//coenzyme metabolic process//alpha-amino acid biosynthetic process//cofactor biosynthetic process//pyrimidine nucleoside monophosphate biosynthetic process//pyrimidine-containing compound metabolic process//carboxylic…	GO:0031224//GO:0044425//GO:0016020//GO:0005575//GO:0016021	intrinsic component of membrane//membrane part//membrane//cellular_component//integral component of membrane	GO:0003824//GO:0016645//GO:0016740//GO:0016491//GO:0004146//GO:0004799//GO:0016741//GO:0042083//GO:0016646//GO:0003674//GO:0008168	catalytic activity//oxidoreductase activity, acting on the CH-NH group of donors//transferase activity//oxidoreductase activity//dihydrofolate reductase activity//thymidylate synthase activity//transferase activity, transferring one-carbon groups//5,10-methylenetetrahydrofolate-dependent methyltransferase activity//oxidoreductase activity, acting on the CH-NH group of donors, NAD or NADP as accep…	K13998 dihydrofolate reductase / thymidylate synthase [EC:1.5.1.3 2.1.1.45] | (RefSeq) bifunctional dihydrofolate reductase-thymidylate synthase-like
234	PGSC0003DMG400000744	86.7044	7.18106	19.1339	7.84928	26.3694	481.765	5496.83	-3.5122	2.4817e-26	6.2107e-24	DOWN	1498.86	466.277	1.6846	0.019452	0.11088	FALSE	1581.42	5795.59	-1.8737	1.1825e-11	1.2955e-09	DOWN	423.228	5795.94	-3.7755	1.0046e-47	6.6278e-45	DOWN	1042.7	391.898	1.4118	0.0027577	0.017157	UP	1080.15	5364.53	-2.3122	1.2843e-16	3.5789e-14	DOWN	GO:0008150//GO:0055114//GO:0008152	biological_process//oxidation-reduction process//metabolic process	--	--	GO:0020037//GO:1901363//GO:0003824//GO:0016491//GO:0016705//GO:0043169//GO:0097159//GO:0046914//GO:0046906//GO:0005506//GO:0005488//GO:0004497//GO:0046872//GO:0043167//GO:0003674	heme binding//heterocyclic compound binding//catalytic activity//oxidoreductase activity//oxidoreductase activity, acting on paired donors, with incorporation or reduction of molecular oxygen//cation binding//organic cyclic compound binding//transition metal ion binding//tetrapyrrole binding//iron ion binding//binding//monooxygenase activity//metal ion binding//ion binding//molecular_function	no KO assigned | (RefSeq) geraniol 8-hydroxylase-like
235	PGSC0003DMG400000746	1.90774	0.0927502	0.630961	0.292221	0.857327	22.6127	152.117	-2.75	6.3791e-08	1.5662e-06	DOWN	61.4148	21.8729	1.4894	0.10618	0.35902	FALSE	64.7976	160.522	-1.3088	0.0037942	0.027638	DOWN	6.88475	160.515	-4.5432	2.6512e-18	1.7452e-16	DOWN	43.2597	6.35952	2.766	0.0015024	0.010578	UP	44.7744	148.546	-1.7302	0.00050313	0.0067063	DOWN	GO:0055114//GO:0008150//GO:0008152	oxidation-reduction process//biological_process//metabolic process	GO:0031224//GO:0016020//GO:0016021//GO:0005575//GO:0044425	intrinsic component of membrane//membrane//integral component of membrane//cellular_component//membrane part	GO:0043169//GO:0097159//GO:0046914//GO:1901363//GO:0020037//GO:0003824//GO:0016491//GO:0016705//GO:0046872//GO:0043167//GO:0003674//GO:0046906//GO:0005506//GO:0005488//GO:0004497	cation binding//organic cyclic compound binding//transition metal ion binding//heterocyclic compound binding//heme binding//catalytic activity//oxidoreductase activity//oxidoreductase activity, acting on paired donors, with incorporation or reduction of molecular oxygen//metal ion binding//ion binding//molecular_function//tetrapyrrole binding//iron ion binding//binding//monooxygenase activity	no KO assigned | (RefSeq) geraniol 8-hydroxylase-like
236	PGSC0003DMG400000754	17.019	4.26943	6.96639	5.54922	6.68625	614.38	1983.7	-1.691	3.2075e-06	5.3275e-05	DOWN	684.121	596.326	0.19815	0.68891	0.9646	FALSE	722.493	2091.73	-1.5336	7.1115e-08	3.1985e-06	DOWN	463.359	2091.01	-2.174	2.819e-11	6.4081e-10	DOWN	693.311	428.326	0.69479	0.010361	0.049289	FALSE	719.181	1936.91	-1.4293	1.5987e-06	5.2849e-05	DOWN	GO:0006796//GO:0019538//GO:0009987//GO:0044238//GO:0006468//GO:0036211//GO:0008150//GO:0043412//GO:0044267//GO:0006464//GO:0044260//GO:0043170//GO:0071704//GO:0016310//GO:0006793//GO:0044237//GO:0008152	phosphate-containing compound metabolic process//protein metabolic process//cellular process//primary metabolic process//protein phosphorylation//protein modification process//biological_process//macromolecule modification//cellular protein metabolic process//cellular protein modification process//cellular macromolecule metabolic process//macromolecule metabolic process//organic substance metabol…	--	--	GO:0016773//GO:0004674//GO:0043169//GO:0097159//GO:0004672//GO:0001882//GO:0016772//GO:0016740//GO:0000166//GO:1901363//GO:0003824//GO:0030554//GO:0001883//GO:0017076//GO:0003674//GO:0036094//GO:0097367//GO:0046872//GO:0043167//GO:1901265//GO:0005509//GO:0035639//GO:0032555//GO:0005488//GO:0032549//GO:0032559//GO:0032550//GO:0016301//GO:0032553//GO:0043168//GO:0005524	phosphotransferase activity, alcohol group as acceptor//protein serine/threonine kinase activity//cation binding//organic cyclic compound binding//protein kinase activity//nucleoside binding//transferase activity, transferring phosphorus-containing groups//transferase activity//nucleotide binding//heterocyclic compound binding//catalytic activity//adenyl nucleotide binding//purine nucleoside bind…	no KO assigned | (RefSeq) CDPK-related protein kinase-like
237	PGSC0003DMG400000761	12.5586	3.50601	4.9498	3.16499	3.57687	337.187	1381.9	-2.035	5.5147e-10	1.9528e-08	DOWN	340.006	326.567	0.058182	0.82823	1	FALSE	359.896	1455.99	-2.0164	1.7205e-12	2.287e-10	DOWN	360.556	1455.88	-2.0136	4.7181e-15	1.9267e-13	DOWN	456.149	333.33	0.45255	0.5493	0.80596	FALSE	474.881	1348.29	-1.5055	0.00047705	0.0064363	DOWN	GO:0008152//GO:0055114//GO:0008150	metabolic process//oxidation-reduction process//biological_process	--	--	GO:0003674//GO:0005507//GO:0046872//GO:0043167//GO:0005488//GO:0046914//GO:0043169//GO:0016491//GO:0003824	molecular_function//copper ion binding//metal ion binding//ion binding//binding//transition metal ion binding//cation binding//oxidoreductase activity//catalytic activity	no KO assigned | (RefSeq) L-ascorbate oxidase homolog
238	PGSC0003DMG400000808	40.8456	11.9697	13.4874	9.25585	18.5039	953.217	4365.12	-2.1951	5.3403e-10	1.8956e-08	DOWN	1745.6	922.679	0.91982	0.0031515	0.027884	FALSE	1842.56	4606.12	-1.3218	5.6847e-05	0.00096168	DOWN	1185.86	4605.92	-1.9576	3.9009e-08	4.7522e-07	DOWN	1239.07	1096.93	0.1758	0.47678	0.74298	FALSE	1283.99	4262.55	-1.7311	4.2451e-07	1.7105e-05	DOWN	--	--	GO:0044425//GO:0005575//GO:0016021//GO:0016020//GO:0031224	membrane part//cellular_component//integral component of membrane//membrane//intrinsic component of membrane	--	--	no KO assigned | (RefSeq) uncharacterized LOC102582701
239	PGSC0003DMG400000917	3.00372	20.7535	10.51	19.047	11.453	1472.36	237.338	2.6331	4.9557e-09	1.4938e-07	UP	808.317	1427.31	-0.8203	0.010193	0.068811	FALSE	853.207	249.161	1.7758	3.8534e-09	2.4111e-07	UP	1555.77	249.075	2.643	3.0034e-23	3.4292e-21	UP	724.324	1440.16	-0.99152	6.5184e-05	0.0007811	FALSE	751.558	231.144	1.7011	7.1972e-08	3.5766e-06	UP	--	--	GO:0031224//GO:0016020//GO:0016021//GO:0005575//GO:0044425	intrinsic component of membrane//membrane//integral component of membrane//cellular_component//membrane part	--	--	no KO assigned | (RefSeq) MORN repeat-containing protein 1-like
240	PGSC0003DMG400001015	0	12.9994	8.47849	5.95813	20.4828	148.221	0	Inf	1.2254e-24	2.6833e-22	UP	468.87	143.508	1.7081	0.00015251	0.0022606	UP	494.479	0	Inf	2.185e-26	2.2535e-23	UP	310.7	0	Inf	2.5335e-18	1.6827e-16	UP	188.852	287.506	-0.60633	0.15641	0.36665	FALSE	195.629	0	Inf	3.3449e-27	4.3363e-24	UP	GO:0006796//GO:0016311//GO:0009987//GO:0008150//GO:0006793//GO:0044237//GO:0008152	phosphate-containing compound metabolic process//dephosphorylation//cellular process//biological_process//phosphorus metabolic process//cellular metabolic process//metabolic process	--	--	GO:0016788//GO:0003824//GO:0042578//GO:0016791//GO:0003674//GO:0016787	hydrolase activity, acting on ester bonds//catalytic activity//phosphoric ester hydrolase activity//phosphatase activity//molecular_function//hydrolase activity	K13248 pyridoxal phosphate phosphatase PHOSPHO2 [EC:3.1.3.74] | (RefSeq) inorganic pyrophosphatase 1-like
241	PGSC0003DMG400001075	5.44125	41.6058	81.0107	77.8595	40.654	5896.69	419.236	3.8141	5.4655e-05	0.00063956	UP	2737.96	5694.77	-1.0565	0.10236	0.35083	FALSE	2884.5	442.178	2.7056	1.7256e-07	6.9089e-06	UP	2971.12	442.054	2.7487	0.0021077	0.007802	UP	5455.34	2754.98	0.98563	0.20825	0.44324	FALSE	5647.35	409.378	3.7861	0.00029388	0.0043315	UP	--	--	--	--	GO:0016747//GO:0016740//GO:0003824//GO:0016746//GO:0003674	transferase activity, transferring acyl groups other than amino-acyl groups//transferase activity//catalytic activity//transferase activity, transferring acyl groups//molecular_function	K19861 benzyl alcohol O-benzoyltransferase [EC:2.3.1.196 2.3.1.232] | (RefSeq) methanol O-anthraniloyltransferase-like
242	PGSC0003DMG400001078	3.10855	12.2839	11.5542	8.85651	9.08994	897.628	323.69	1.4715	0.00016107	0.001615	UP	842.239	870.224	-0.047157	0.8722	1	FALSE	890.019	340.158	1.3876	1.7145e-06	5.052e-05	UP	1210.83	339.977	1.8325	0.0033622	0.011643	UP	1038.18	1118.7	-0.10776	0.85855	1	FALSE	1078.97	315.49	1.774	0.0020654	0.020371	UP	GO:0055114//GO:0008150//GO:0008152	oxidation-reduction process//biological_process//metabolic process	--	--	GO:0043169//GO:0097159//GO:0046914//GO:0020037//GO:1901363//GO:0003824//GO:0016491//GO:0016705//GO:0046872//GO:0043167//GO:0003674//GO:0016829//GO:0046906//GO:0005488//GO:0005506//GO:0004497	cation binding//organic cyclic compound binding//transition metal ion binding//heme binding//heterocyclic compound binding//catalytic activity//oxidoreductase activity//oxidoreductase activity, acting on paired donors, with incorporation or reduction of molecular oxygen//metal ion binding//ion binding//molecular_function//lyase activity//tetrapyrrole binding//binding//iron ion binding//monooxygen…	K10528 hydroperoxide lyase [EC:4.1.2.-] | (RefSeq) HPL; fatty acid hydroperoxide lyase
243	PGSC0003DMG400001130	48.3263	3.58837	14.1231	14.0837	9.90887	294.042	1067.06	-1.8595	0.00289	0.017608	DOWN	193.369	285.064	-0.55992	0.23892	0.57756	FALSE	204.287	1127.94	-2.465	0.00037124	0.0044326	DOWN	72.8444	1128.04	-3.9529	8.7129e-07	7.9444e-06	DOWN	265.894	67.4308	1.9794	7.0013e-08	2.108e-06	UP	275.508	1042.91	-1.9204	0.0022618	0.021776	DOWN	--	--	GO:0031224//GO:0005575//GO:0016021//GO:0016020//GO:0044425	intrinsic component of membrane//cellular_component//integral component of membrane//membrane//membrane part	--	--	K00981 phosphatidate cytidylyltransferase [EC:2.7.7.41] | (RefSeq) CDS1, cds; phosphatidate cytidylyltransferase-like
244	PGSC0003DMG400001144	2.71164	0.0780829	0.312151	0.170848	0.287772	10.2718	169.199	-4.042	4.4096e-05	0.00052825	DOWN	16.3751	9.98274	0.714	0.59504	0.91127	FALSE	17.3143	177.41	-3.357	0.00012993	0.0018892	DOWN	4.65677	177.25	-5.2503	5.2251e-07	4.983e-06	DOWN	17.6796	4.3008	2.0394	0.20962	0.44501	FALSE	18.3051	164.762	-3.1701	0.00027315	0.004103	DOWN	GO:0008152//GO:0055114//GO:0008150	metabolic process//oxidation-reduction process//biological_process	--	--	GO:0046872//GO:0043167//GO:0003674//GO:0046906//GO:0005488//GO:0005506//GO:0004497//GO:0043169//GO:0097159//GO:0046914//GO:1901363//GO:0020037//GO:0003824//GO:0016491//GO:0016705	metal ion binding//ion binding//molecular_function//tetrapyrrole binding//binding//iron ion binding//monooxygenase activity//cation binding//organic cyclic compound binding//transition metal ion binding//heterocyclic compound binding//heme binding//catalytic activity//oxidoreductase activity//oxidoreductase activity, acting on paired donors, with incorporation or reduction of molecular oxygen	no KO assigned | (RefSeq) cytochrome P450 71A1-like
245	PGSC0003DMG400001161	6.45322	16.6872	14.8267	24.7865	15.0112	2354.63	616.739	1.9328	0.004435	0.024921	UP	1266.35	2276.55	-0.84617	0.13675	0.41945	FALSE	1338.52	648.302	1.0459	0.0016006	0.014186	UP	1505.92	648.554	1.2153	1.4318e-06	1.2346e-05	UP	1231.34	1393.53	-0.17851	0.47869	0.74451	FALSE	1277.74	600.631	1.089	0.00016791	0.0027799	UP	--	--	--	--	GO:0005488//GO:0003674//GO:0046983//GO:0005515	binding//molecular_function//protein dimerization activity//protein binding	K13422 transcription factor MYC2 | (RefSeq) jamyc10; transcription factor MYC4-like
246	PGSC0003DMG400001195	2.98386	8.97353	7.8428	8.7765	8.17863	214.529	74.6924	1.5221	0.00027421	0.0025197	UP	180.873	207.749	-0.19987	0.64019	0.93749	FALSE	191.018	78.5886	1.2813	0.0029561	0.022746	UP	210.931	78.5812	1.4245	7.8127e-05	0.00043862	UP	169.359	195.296	-0.20558	0.57626	0.82704	FALSE	175.844	72.8186	1.2719	0.0036063	0.031077	UP	--	--	--	--	--	--	no KO assigned | (RefSeq) outer envelope membrane protein 7-like
247	PGSC0003DMG400001228	17.1151	45.794	48.4392	36.946	41.7182	3276.78	1536.12	1.093	0.0011446	0.0082959	UP	3300.67	3168.54	0.05894	0.75327	0.99	FALSE	3487.75	1615.65	1.1102	4.1968e-05	0.00074185	UP	3859.06	1616.17	1.2557	0.00011322	0.00060726	UP	3810.24	3577.89	0.090774	0.85677	0.99962	FALSE	3949.32	1496.61	1.3999	3.633e-05	0.00079127	UP	--	--	GO:0031224//GO:0016020//GO:0005575//GO:0016021//GO:0044425	intrinsic component of membrane//membrane//cellular_component//integral component of membrane//membrane part	GO:0097159//GO:0043169//GO:1901363//GO:0020037//GO:0043167//GO:0046872//GO:0003674//GO:0046906//GO:0005488	organic cyclic compound binding//cation binding//heterocyclic compound binding//heme binding//ion binding//metal ion binding//molecular_function//tetrapyrrole binding//binding	no KO assigned | (RefSeq) cytochrome b5
248	PGSC0003DMG400001287	0.14627	5.75812	5.94841	4.84279	3.91437	145.542	4.70612	4.9508	7.1002e-07	1.3784e-05	UP	102.237	140.653	-0.46022	0.63424	0.93458	FALSE	108.371	5.0103	4.4349	0.0035479	0.02624	UP	163.661	4.99953	5.0328	2.6846e-05	0.00016933	UP	160.037	151.751	0.076701	0.9972	1	FALSE	165.622	4.62982	5.1608	0.00028678	0.0042563	UP	GO:0019752//GO:0008150//GO:1901564//GO:0006536//GO:0009987//GO:0043436//GO:0044238//GO:0044281//GO:0006082//GO:0006807//GO:0044237//GO:0008152//GO:0009064//GO:1901605//GO:0071704//GO:0043648//GO:0006520	carboxylic acid metabolic process//biological_process//organonitrogen compound metabolic process//glutamate metabolic process//cellular process//oxoacid metabolic process//primary metabolic process//small molecule metabolic process//organic acid metabolic process//nitrogen compound metabolic process//cellular metabolic process//metabolic process//glutamine family amino acid metabolic process//alp…	--	--	GO:1901363//GO:0003824//GO:0004351//GO:0097159//GO:0016830//GO:0016829//GO:0043168//GO:0005488//GO:0016831//GO:0030170//GO:0043167//GO:0048037//GO:0003674	heterocyclic compound binding//catalytic activity//glutamate decarboxylase activity//organic cyclic compound binding//carbon-carbon lyase activity//lyase activity//anion binding//binding//carboxy-lyase activity//pyridoxal phosphate binding//ion binding//cofactor binding//molecular_function	K01580 glutamate decarboxylase [EC:4.1.1.15] | (RefSeq) glutamate decarboxylase 3-like
249	PGSC0003DMG400001296	2.32187	6.31832	6.33287	5.6039	6.20083	420.248	177.919	1.24	0.00058892	0.004753	UP	420.939	406.709	0.049617	0.87277	1	FALSE	444.508	187.28	1.247	0.0001867	0.0025428	UP	454.093	187.316	1.2775	1.3536e-05	9.16e-05	UP	418.665	420.167	-0.0051661	0.98397	1	FALSE	434.429	173.446	1.3246	0.00010233	0.0018696	UP	GO:0044237//GO:0051252//GO:0008152//GO:1901360//GO:0006139//GO:1903506//GO:0044271//GO:0034645//GO:0006351//GO:0043170//GO:0097659//GO:0071704//GO:0019222//GO:0006725//GO:2001141//GO:0044260//GO:1901576//GO:0019219//GO:0009059//GO:0018130//GO:0050794//GO:0019438//GO:0034654//GO:0060255//GO:0010556//GO:0034641//GO:0009889//GO:0016070//GO:0044249//GO:0031323//GO:0050789//GO:0006355//GO:0008150//GO:…	cellular metabolic process//regulation of RNA metabolic process//metabolic process//organic cyclic compound metabolic process//nucleobase-containing compound metabolic process//regulation of nucleic acid-templated transcription//cellular nitrogen compound biosynthetic process//cellular macromolecule biosynthetic process//transcription, DNA-templated//macromolecule metabolic process//nucleic acid-…	GO:0044424//GO:0032991//GO:0043227//GO:0043229//GO:0005575//GO:0043231//GO:0005623//GO:0005667//GO:0044464//GO:0043226//GO:0005622//GO:0005634	intracellular part//protein-containing complex//membrane-bounded organelle//intracellular organelle//cellular_component//intracellular membrane-bounded organelle//cell//transcription factor complex//cell part//organelle//intracellular//nucleus	GO:0005488//GO:0003700//GO:0003674//GO:0003676//GO:0003677//GO:1901363//GO:0097159	binding//DNA-binding transcription factor activity//molecular_function//nucleic acid binding//DNA binding//heterocyclic compound binding//organic cyclic compound binding	K09391 transcription factor E2F7/8 | (RefSeq) E2F transcription factor-like E2FF
250	PGSC0003DMG400001323	1.0419	0.0892502	0.184408	0.189835	0.26401	15.3189	84.6491	-2.4662	3.727e-05	0.00045526	DOWN	19.6076	14.8053	0.4053	0.72903	0.98094	FALSE	20.6736	89.0601	-2.107	0.00069305	0.0072748	DOWN	6.79483	89.0701	-3.7124	9.6807e-10	1.6489e-08	DOWN	12.9545	6.31055	1.0376	0.39581	0.66509	FALSE	13.4244	82.5049	-2.6196	0.00011076	0.0019883	DOWN	GO:0044237//GO:0008152//GO:0051252//GO:0044271//GO:0006139//GO:1901360//GO:1903506//GO:0043170//GO:0034645//GO:0006351//GO:0071704//GO:0097659//GO:0006725//GO:0019222//GO:2001141//GO:1901576//GO:0044260//GO:0009059//GO:0019219//GO:0018130//GO:0050794//GO:0034654//GO:0019438//GO:0010556//GO:0060255//GO:0044249//GO:0031323//GO:0050789//GO:0009889//GO:0034641//GO:0016070//GO:0065007//GO:0010468//GO:…	cellular metabolic process//metabolic process//regulation of RNA metabolic process//cellular nitrogen compound biosynthetic process//nucleobase-containing compound metabolic process//organic cyclic compound metabolic process//regulation of nucleic acid-templated transcription//macromolecule metabolic process//cellular macromolecule biosynthetic process//transcription, DNA-templated//organic subst…	GO:0044424//GO:0043227//GO:0043229//GO:0043231//GO:0005575//GO:0005623//GO:0043226//GO:0044464//GO:0005634//GO:0005622	intracellular part//membrane-bounded organelle//intracellular organelle//intracellular membrane-bounded organelle//cellular_component//cell//organelle//cell part//nucleus//intracellular	GO:0005488//GO:0003674//GO:1901363//GO:0003676//GO:0003677//GO:0097159	binding//molecular_function//heterocyclic compound binding//nucleic acid binding//DNA binding//organic cyclic compound binding	no KO assigned | (RefSeq) putative NAC domain-containing protein 94
251	PGSC0003DMG400001330	0.829041	6.9358	7.70737	5.66829	8.38327	418.619	62.1109	2.7527	3.0117e-12	1.5931e-10	UP	567.515	405.299	0.48567	0.16094	0.46095	FALSE	598.922	65.2322	3.1987	1.1577e-12	1.5956e-10	UP	492.14	65.1871	2.9164	2.3322e-19	1.7799e-17	UP	507.116	455.535	0.15476	0.59432	0.84002	FALSE	525.744	60.5269	3.1187	7.2333e-17	2.1354e-14	UP	GO:0044260//GO:1901576//GO:2001141//GO:0009059//GO:0019219//GO:0097659//GO:0071704//GO:0006351//GO:0034645//GO:0043170//GO:0006725//GO:0019222//GO:0044271//GO:1903506//GO:1901360//GO:0006139//GO:0044237//GO:0008152//GO:0051252//GO:0010467//GO:0009058//GO:0006807//GO:0046483//GO:0044238//GO:0051171//GO:0009987//GO:1901362//GO:0080090//GO:0090304//GO:0050789//GO:0031323//GO:0044249//GO:0016070//GO:…	cellular macromolecule metabolic process//organic substance biosynthetic process//regulation of RNA biosynthetic process//macromolecule biosynthetic process//regulation of nucleobase-containing compound metabolic process//nucleic acid-templated transcription//organic substance metabolic process//transcription, DNA-templated//cellular macromolecule biosynthetic process//macromolecule metabolic pro…	GO:0043229//GO:0043231//GO:0005575//GO:0043227//GO:0044424//GO:0005634//GO:0005622//GO:0043226//GO:0044464//GO:0005623	intracellular organelle//intracellular membrane-bounded organelle//cellular_component//membrane-bounded organelle//intracellular part//nucleus//intracellular//organelle//cell part//cell	GO:0003674//GO:0005488//GO:0097159//GO:1901363//GO:0003677//GO:0003676	molecular_function//binding//organic cyclic compound binding//heterocyclic compound binding//DNA binding//nucleic acid binding	no KO assigned | (RefSeq) cyclic dof factor 2-like
252	PGSC0003DMG400001345	5.65338	2.20132	2.52799	2.24617	2.86634	241.157	632.958	-1.3921	6.1673e-05	0.00070942	DOWN	282.316	233.68	0.27278	0.5082	0.84962	FALSE	297.821	667.59	-1.1645	0.00012321	0.0018172	DOWN	228.983	667.517	-1.5436	3.1047e-08	3.8582e-07	DOWN	241.009	211.826	0.1862	0.49185	0.75754	FALSE	250.036	617.96	-1.3054	8.3294e-05	0.0015729	DOWN	--	--	--	--	--	--	no KO assigned | (RefSeq) pentatricopeptide repeat-containing protein At3g29230
253	PGSC0003DMG400001387	28.443	0.249391	1.1203	1.50287	3.19813	53.8703	1038.4	-4.2687	2.1033e-29	7.5466e-27	DOWN	102.905	52.0841	0.9824	0.06641	0.26462	FALSE	108.521	1093.24	-3.3326	5.1139e-26	4.934e-23	DOWN	8.49492	1092.91	-7.0074	1.7451e-77	4.3174e-74	DOWN	34.8832	7.86751	2.1486	0.013492	0.06043	FALSE	36.2232	1012.94	-4.8055	2.0701e-38	1.2345e-34	DOWN	GO:0009059//GO:0019219//GO:2001141//GO:0044260//GO:1901576//GO:0006725//GO:0019222//GO:0006351//GO:0034645//GO:0043170//GO:0097659//GO:0071704//GO:0044271//GO:1901360//GO:0006139//GO:1903506//GO:0008152//GO:0051252//GO:0044237//GO:0009058//GO:0006807//GO:0010467//GO:1901362//GO:0080090//GO:0090304//GO:0051171//GO:0009987//GO:0046483//GO:0044238//GO:0065007//GO:2000112//GO:0032774//GO:0010468//GO:…	macromolecule biosynthetic process//regulation of nucleobase-containing compound metabolic process//regulation of RNA biosynthetic process//cellular macromolecule metabolic process//organic substance biosynthetic process//cellular aromatic compound metabolic process//regulation of metabolic process//transcription, DNA-templated//cellular macromolecule biosynthetic process//macromolecule metabolic…	--	--	GO:0003674//GO:0003700	molecular_function//DNA-binding transcription factor activity	no KO assigned | (RefSeq) basic leucine zipper 43
254	PGSC0003DMG400001419	67.8118	9.13204	20.6924	17.0303	13.6368	2318.6	9642.55	-2.0562	0.00219	0.014102	DOWN	1693.39	2243.47	-0.40582	0.152	0.44715	FALSE	1787.89	10193.9	-2.5114	0.00061339	0.0066039	DOWN	1186.47	10192.6	-3.1028	9.4133e-05	0.00051533	DOWN	2496.22	1101.16	1.1807	9.4175e-06	0.0001538	UP	2589.96	9426.99	-1.8639	0.004658	0.037649	DOWN	GO:0006810//GO:0051234//GO:0008150//GO:0009987//GO:0051179//GO:0055085	transport//establishment of localization//biological_process//cellular process//localization//transmembrane transport	GO:0031224//GO:0044425//GO:0016020//GO:0005575//GO:0016021	intrinsic component of membrane//membrane part//membrane//cellular_component//integral component of membrane	GO:0001883//GO:0003824//GO:0030554//GO:1901363//GO:0016887//GO:0000166//GO:0001882//GO:0022857//GO:0097159//GO:0016462//GO:0017111//GO:0043492//GO:0005215//GO:0022804//GO:0042626//GO:0043168//GO:0005524//GO:0032553//GO:0015405//GO:0032550//GO:0016787//GO:0032549//GO:0016817//GO:0032559//GO:0042623//GO:0032555//GO:0005488//GO:0035639//GO:1901265//GO:0043167//GO:0097367//GO:0036094//GO:0016818//GO:…	purine nucleoside binding//catalytic activity//adenyl nucleotide binding//heterocyclic compound binding//ATPase activity//nucleotide binding//nucleoside binding//transmembrane transporter activity//organic cyclic compound binding//pyrophosphatase activity//nucleoside-triphosphatase activity//ATPase activity, coupled to movement of substances//transporter activity//active transmembrane transporter…	K05658 ATP-binding cassette, subfamily B (MDR/TAP), member 1 [EC:3.6.3.44] | (RefSeq) ABC transporter B family member 19
255	PGSC0003DMG400001422	3.06221	10.0175	17.5592	18.7784	12.5311	1652.53	274.738	2.5885	0.0017355	0.011666	UP	989.978	1596.29	-0.68926	0.22804	0.56262	FALSE	1044.37	289.878	1.8491	1.4581e-10	1.2903e-08	UP	832.214	289.787	1.522	0.00091946	0.0038071	UP	1370.22	771.048	0.82952	0.20345	0.43636	FALSE	1419.55	268.344	2.4033	0.0025764	0.024074	UP	GO:0044271//GO:0043043//GO:0044237//GO:0008152//GO:1901576//GO:0044260//GO:0043604//GO:0009059//GO:0071704//GO:0006518//GO:0043170//GO:0034645//GO:0034641//GO:1901566//GO:0044249//GO:0008150//GO:1901564//GO:0044267//GO:0010467//GO:0043603//GO:0006807//GO:0009058//GO:0019538//GO:0044238//GO:0009987//GO:0006412	cellular nitrogen compound biosynthetic process//peptide biosynthetic process//cellular metabolic process//metabolic process//organic substance biosynthetic process//cellular macromolecule metabolic process//amide biosynthetic process//macromolecule biosynthetic process//organic substance metabolic process//peptide metabolic process//macromolecule metabolic process//cellular macromolecule biosynt…	GO:0043232//GO:0005840//GO:0044424//GO:0005737//GO:0044425//GO:0016021//GO:0043229//GO:0005575//GO:0032991//GO:0016020//GO:0043228//GO:0005623//GO:0044444//GO:0005622//GO:0044464//GO:0043226//GO:0031224	intracellular non-membrane-bounded organelle//ribosome//intracellular part//cytoplasm//membrane part//integral component of membrane//intracellular organelle//cellular_component//protein-containing complex//membrane//non-membrane-bounded organelle//cell//cytoplasmic part//intracellular//cell part//organelle//intrinsic component of membrane	GO:0003674//GO:0003735//GO:0005198	molecular_function//structural constituent of ribosome//structural molecule activity	no KO assigned | (RefSeq) uncharacterized LOC102584441
256	PGSC0003DMG400001448	7.22093	20.4125	34.3541	59.3397	18.5036	5078.67	622.895	3.0274	0.003541	0.020759	UP	1398.41	4906.44	-1.8109	0.039393	0.18567	FALSE	1477.46	655.781	1.1718	3.4974e-05	0.00063899	UP	1647.12	655.8	1.3286	0.0068004	0.021238	UP	2580.78	1526.72	0.75737	0.09541	0.25989	FALSE	2677.1	607.401	2.14	9.8001e-06	0.00025882	UP	GO:0008152//GO:0008150//GO:0055114	metabolic process//biological_process//oxidation-reduction process	--	--	GO:0003979//GO:0005488//GO:0051287//GO:1901265//GO:0016614//GO:0003674//GO:0016616//GO:0048037//GO:0036094//GO:0000166//GO:1901363//GO:0003824//GO:0016491//GO:0050662//GO:0097159	UDP-glucose 6-dehydrogenase activity//binding//NAD binding//nucleoside phosphate binding//oxidoreductase activity, acting on CH-OH group of donors//molecular_function//oxidoreductase activity, acting on the CH-OH group of donors, NAD or NADP as acceptor//cofactor binding//small molecule binding//nucleotide binding//heterocyclic compound binding//catalytic activity//oxidoreductase activity//coenzy…	K00012 UDPglucose 6-dehydrogenase [EC:1.1.1.22] | (RefSeq) UDP-glucose 6-dehydrogenase 2
257	PGSC0003DMG400001524	7.42235	19.9064	38.968	32.1775	28.0692	2316.25	542.128	2.0951	1.0775e-09	3.6343e-08	UP	1805.9	2240.99	-0.31142	0.34944	0.70815	FALSE	1908.84	570.186	1.7432	1.4907e-06	4.5081e-05	UP	1365.36	570.6	1.2587	1.7068e-05	0.00011248	UP	2457.03	1265.82	0.95685	0.00025402	0.002477	FALSE	2550.17	527.949	2.2721	2.7987e-12	3.8995e-10	UP	GO:0006807//GO:0009058//GO:0008652//GO:0006082//GO:0044281//GO:0009987//GO:0044238//GO:0043436//GO:0008150//GO:1901564//GO:0009069//GO:0044249//GO:1901566//GO:0044283//GO:1901607//GO:0019752//GO:0046394//GO:0009070//GO:0006520//GO:1901576//GO:0006564//GO:1901605//GO:0071704//GO:0008152//GO:0016053//GO:0006563//GO:0044237	nitrogen compound metabolic process//biosynthetic process//cellular amino acid biosynthetic process//organic acid metabolic process//small molecule metabolic process//cellular process//primary metabolic process//oxoacid metabolic process//biological_process//organonitrogen compound metabolic process//serine family amino acid metabolic process//cellular biosynthetic process//organonitrogen compoun…	--	--	GO:0016740//GO:0003824//GO:0016769//GO:0003674//GO:0004648//GO:0008483	transferase activity//catalytic activity//transferase activity, transferring nitrogenous groups//molecular_function//O-phospho-L-serine:2-oxoglutarate aminotransferase activity//transaminase activity	K00831 phosphoserine aminotransferase [EC:2.6.1.52] | (RefSeq) phosphoserine aminotransferase 2, chloroplastic
258	PGSC0003DMG400001567	85.159	1016.69	386.194	609.098	515.412	25537.1	3614.49	2.8207	3.6172e-19	4.5263e-17	UP	19453.2	24703.6	-0.34472	0.23697	0.57494	FALSE	20536.6	3798.49	2.4347	4.2009e-23	2.7921e-20	UP	40694	3795.67	3.4224	6.2131e-44	3.236e-41	UP	14372.7	37693	-1.391	9.9606e-11	6.257e-09	DOWN	14906	3523.77	2.0807	2.607e-09	1.8119e-07	UP	--	--	GO:0044424//GO:0043231//GO:0005575//GO:0043229//GO:0043227//GO:0005623//GO:0005634//GO:0005622//GO:0043226//GO:0044464	intracellular part//intracellular membrane-bounded organelle//cellular_component//intracellular organelle//membrane-bounded organelle//cell//nucleus//intracellular//organelle//cell part	GO:0005488//GO:0003674//GO:1901363//GO:0003677//GO:0003676//GO:0097159	binding//molecular_function//heterocyclic compound binding//DNA binding//nucleic acid binding//organic cyclic compound binding	K10802 high mobility group protein B1 | (RefSeq) HMG1/2-like protein
259	PGSC0003DMG400001639	1.27968	7.99057	5.88561	10.0559	5.61193	487.608	65.3397	2.8997	1.5187e-09	4.9811e-08	UP	246.919	472.287	-0.93563	0.0085927	0.060215	FALSE	260.721	69.1274	1.9152	1.6178e-06	4.834e-05	UP	372.079	69.0507	2.4299	6.4613e-14	2.2023e-12	UP	250.259	344.706	-0.46194	0.16697	0.38309	FALSE	260.014	63.9739	2.023	0.00070329	0.0088035	UP	GO:0022613//GO:0042273//GO:1901360//GO:0006139//GO:0008152//GO:0000460//GO:0044237//GO:0044260//GO:0016072//GO:0006725//GO:0006364//GO:0071704//GO:0043170//GO:0034660//GO:0008150//GO:0016070//GO:0034641//GO:0000470//GO:0044085//GO:0034470//GO:0006807//GO:0071840//GO:0010467//GO:0000466//GO:0090304//GO:0006396//GO:0000463//GO:0046483//GO:0042254//GO:0044238//GO:0009987	ribonucleoprotein complex biogenesis//ribosomal large subunit biogenesis//organic cyclic compound metabolic process//nucleobase-containing compound metabolic process//metabolic process//maturation of 5.8S rRNA//cellular metabolic process//cellular macromolecule metabolic process//rRNA metabolic process//cellular aromatic compound metabolic process//rRNA processing//organic substance metabolic pro…	GO:0030684//GO:0043232//GO:0043233//GO:0031981//GO:0044424//GO:0043231//GO:0005575//GO:0005654//GO:0043229//GO:0044446//GO:0044422//GO:0070013//GO:0043227//GO:0030687//GO:0044428//GO:0032991//GO:0043228//GO:0005730//GO:0005623//GO:0005634//GO:0005622//GO:0031974//GO:0043226//GO:0044464	preribosome//intracellular non-membrane-bounded organelle//organelle lumen//nuclear lumen//intracellular part//intracellular membrane-bounded organelle//cellular_component//nucleoplasm//intracellular organelle//intracellular organelle part//organelle part//intracellular organelle lumen//membrane-bounded organelle//preribosome, large subunit precursor//nuclear part//protein-containing complex//non…	GO:0005488//GO:0043021//GO:0003674//GO:0044877	binding//ribonucleoprotein complex binding//molecular_function//protein-containing complex binding	K14863 ribosome biogenesis protein YTM1 | (RefSeq) ribosome biogenesis protein WDR12 homolog
260	PGSC0003DMG400001646	0.649274	2.82371	5.91499	3.37602	5.81656	351.406	68.5322	2.3583	0.00054035	0.0044225	UP	552.148	340.137	0.69894	0.10338	0.35311	FALSE	583.318	72.0481	3.0172	4.5285e-09	2.7698e-07	UP	280.82	72.077	1.962	1.5593e-08	2.0713e-07	UP	540.705	260.041	1.0561	0.0037673	0.022145	UP	560.695	66.7461	3.0705	5.0033e-09	3.253e-07	UP	--	--	--	--	--	--	no KO assigned | (RefSeq) intracellular protein transport protein USO1-like
261	PGSC0003DMG400001684	2.10679	5.11604	6.15851	5.84312	6.92105	354.957	130.505	1.4435	0.00018579	0.0018291	UP	378.42	343.175	0.14104	0.6768	0.9578	FALSE	399.425	137.468	1.5388	1.0146e-05	0.00023127	UP	295.228	137.423	1.1032	0.00044316	0.0020244	UP	328.983	273.725	0.26528	0.37496	0.64292	FALSE	341.172	127.346	1.4218	8.4144e-05	0.0015869	UP	--	--	--	--	--	--	no KO assigned | (RefSeq) uncharacterized LOC102584533
262	PGSC0003DMG400001707	23.6842	4.96298	7.12473	5.05553	8.9474	164.102	793.722	-2.274	7.3684e-11	3.0351e-09	DOWN	264.776	158.887	0.73677	0.064398	0.25887	FALSE	279.541	836.448	-1.5812	1.0073e-07	4.3226e-06	DOWN	155.147	836.39	-2.4305	6.1371e-18	3.8277e-16	DOWN	206.921	143.59	0.52713	0.15156	0.35944	FALSE	214.56	774.502	-1.8519	3.7639e-09	2.522e-07	DOWN	--	--	--	--	--	--	--
263	PGSC0003DMG400001708	22.1661	6.18932	9.12079	9.44026	9.20793	314.015	760.182	-1.2755	0.0016027	0.010932	DOWN	276.587	303.678	-0.13481	0.71483	0.97573	FALSE	291.848	802.295	-1.4589	0.00052188	0.0057961	DOWN	196.559	801.954	-2.0286	1.6712e-05	0.00011045	DOWN	272.228	181.938	0.58137	0.40755	0.67746	FALSE	281.977	742.698	-1.3972	0.0031921	0.028344	DOWN	--	--	GO:0044425//GO:0016020//GO:0005575//GO:0016021//GO:0031224	membrane part//membrane//cellular_component//integral component of membrane//intrinsic component of membrane	--	--	--
264	PGSC0003DMG400001809	773.521	304.787	239.955	294.091	278.435	13122.2	35519.8	-1.4366	1.6301e-06	2.8897e-05	DOWN	11345.5	12694.8	-0.16212	0.51559	0.8556	FALSE	11967	37453.2	-1.646	7.3548e-12	8.5928e-10	DOWN	13003.3	37452	-1.5262	3.3513e-11	7.4919e-10	DOWN	9565.29	12038.7	-0.3318	0.15502	0.36467	FALSE	9908.16	34669.8	-1.807	3.4233e-12	4.5978e-10	DOWN	GO:0044085//GO:0008150//GO:0071554//GO:0010410//GO:0005976//GO:0016043//GO:0044238//GO:0009987//GO:0006073//GO:0071555//GO:0045229//GO:0010383//GO:0071840//GO:0008152//GO:0044237//GO:0044264//GO:0044036//GO:0044262//GO:0010411//GO:0044042//GO:0071704//GO:0043170//GO:0044260//GO:0042546//GO:0005975	cellular component biogenesis//biological_process//cell wall organization or biogenesis//hemicellulose metabolic process//polysaccharide metabolic process//cellular component organization//primary metabolic process//cellular process//cellular glucan metabolic process//cell wall organization//external encapsulating structure organization//cell wall polysaccharide metabolic process//cellular compon…	GO:0005623//GO:0005618//GO:0044464//GO:0005576//GO:0071944//GO:0030312//GO:0048046//GO:0005575	cell//cell wall//cell part//extracellular region//cell periphery//external encapsulating structure//apoplast//cellular_component	GO:0003824//GO:0016740//GO:0016762//GO:0004553//GO:0016787//GO:0016798//GO:0016758//GO:0003674//GO:0016757	catalytic activity//transferase activity//xyloglucan:xyloglucosyl transferase activity//hydrolase activity, hydrolyzing O-glycosyl compounds//hydrolase activity//hydrolase activity, acting on glycosyl bonds//transferase activity, transferring hexosyl groups//molecular_function//transferase activity, transferring glycosyl groups	K08235 xyloglucan:xyloglucosyl transferase [EC:2.4.1.207] | (RefSeq) probable xyloglucan endotransglucosylase/hydrolase protein 30
265	PGSC0003DMG400001833	110.536	18.6593	30.0413	13.9948	35.1642	1319.65	10808.7	-3.034	2.8443e-21	4.4582e-19	DOWN	3035.2	1277.92	1.248	3.9891e-05	0.000724	UP	3202.05	11396.5	-1.8315	4.0681e-14	6.9384e-12	DOWN	1697.57	11398.6	-2.7473	6.9413e-30	1.4825e-27	DOWN	2520.7	1570.47	0.68263	0.0065485	0.034378	FALSE	2613.03	10547.4	-2.0131	1.0986e-13	1.9734e-11	DOWN	--	--	GO:0016020//GO:0016021//GO:0005575//GO:0044425//GO:0031224	membrane//integral component of membrane//cellular_component//membrane part//intrinsic component of membrane	--	--	no KO assigned | (RefSeq) uncharacterized LOC102580713
266	PGSC0003DMG400001846	143.82	13.2107	21.0099	27.9608	24.3709	1499.13	7963.92	-2.4094	3.4839e-07	7.3427e-06	DOWN	1178.66	1449.9	-0.29881	0.32656	0.68308	FALSE	1244	8406.62	-2.7565	7.6795e-08	3.4271e-06	DOWN	673.464	8404.17	-3.6414	1.2461e-10	2.5064e-09	DOWN	1003.99	624.926	0.68399	0.12897	0.32207	FALSE	1040.28	7780.47	-2.9029	2.1517e-08	1.1947e-06	DOWN	GO:0051234//GO:0006810//GO:0008150//GO:0051179	establishment of localization//transport//biological_process//localization	GO:0044425//GO:0016020//GO:0016021//GO:0005575//GO:0031224	membrane part//membrane//integral component of membrane//cellular_component//intrinsic component of membrane	GO:0003674//GO:0005215	molecular_function//transporter activity	no KO assigned | (RefSeq) probable purine permease 11
267	PGSC0003DMG400001848	141.473	16.3457	64.3431	27.3972	72.854	1109.25	5896.07	-2.4102	1.5262e-14	1.125e-12	DOWN	2653.46	1074.39	1.3044	0.00058058	0.0069659	UP	2805.94	6207.97	-1.1456	3.7809e-06	9.9284e-05	DOWN	635.553	6206.38	-3.2877	6.4757e-39	2.4968e-36	DOWN	2333.66	589.214	1.9857	1.0265e-06	2.2724e-05	UP	2420.2	5751.47	-1.2488	1.2198e-06	4.239e-05	DOWN	--	--	GO:0005576//GO:0005575	extracellular region//cellular_component	--	--	no KO assigned | (RefSeq) expansin-like B1
268	PGSC0003DMG400001854	0.323036	2.40812	2.95534	2.00465	1.85405	136.707	22.5601	2.5992	5.3408e-07	1.0732e-05	UP	111.584	132.255	-0.24519	0.69273	0.96624	FALSE	117.934	23.773	2.3106	0.004637	0.032249	UP	156.476	23.7787	2.7182	7.7353e-06	5.5497e-05	UP	176.981	145.112	0.28643	0.41535	0.68465	FALSE	183.731	22.0058	3.0616	1.0741e-09	8.2973e-08	UP	--	--	GO:0044464//GO:0031224//GO:0005622//GO:0044444//GO:0005623//GO:0005886//GO:0016020//GO:0016021//GO:0005575//GO:0044424//GO:0071944//GO:0044425//GO:0005737//GO:0009504	cell part//intrinsic component of membrane//intracellular//cytoplasmic part//cell//plasma membrane//membrane//integral component of membrane//cellular_component//intracellular part//cell periphery//membrane part//cytoplasm//cell plate	--	--	K08494 novel plant SNARE | (RefSeq) novel plant SNARE 11
269	PGSC0003DMG400002047	117.924	26.5876	51.7531	24.4347	56.027	1116.58	5532.26	-2.3088	1.2872e-13	8.3338e-12	DOWN	2334.43	1080.38	1.1115	0.0009534	0.010582	UP	2462.17	5831.71	-1.244	2.2505e-07	8.6406e-06	DOWN	1159.36	5830.97	-2.3304	4.561e-22	4.718e-20	DOWN	2082.68	1074.45	0.95484	0.0029788	0.01826	FALSE	2158.99	5399.52	-1.3225	1.2636e-06	4.3505e-05	DOWN	GO:0044271//GO:1903506//GO:1901360//GO:0006139//GO:0044237//GO:0008152//GO:0051252//GO:0044260//GO:1901576//GO:2001141//GO:0009059//GO:0019219//GO:0097659//GO:0071704//GO:0006351//GO:0034645//GO:0043170//GO:0006725//GO:0019222//GO:0050789//GO:0031323//GO:0044249//GO:0016070//GO:0034641//GO:0009889//GO:2000112//GO:0032774//GO:0010468//GO:0065007//GO:0008150//GO:0031326//GO:0006355//GO:0050794//GO:…	cellular nitrogen compound biosynthetic process//regulation of nucleic acid-templated transcription//organic cyclic compound metabolic process//nucleobase-containing compound metabolic process//cellular metabolic process//metabolic process//regulation of RNA metabolic process//cellular macromolecule metabolic process//organic substance biosynthetic process//regulation of RNA biosynthetic process/…	GO:0044424//GO:0043229//GO:0043231//GO:0005575//GO:0043227//GO:0005623//GO:0005634//GO:0005622//GO:0043226//GO:0044464	intracellular part//intracellular organelle//intracellular membrane-bounded organelle//cellular_component//membrane-bounded organelle//cell//nucleus//intracellular//organelle//cell part	GO:0005488//GO:0003680//GO:0003674//GO:0003700//GO:0043565//GO:1901363//GO:0003677//GO:0003676//GO:0097159	binding//AT DNA binding//molecular_function//DNA-binding transcription factor activity//sequence-specific DNA binding//heterocyclic compound binding//DNA binding//nucleic acid binding//organic cyclic compound binding	no KO assigned | (RefSeq) RSI2; AT-hook motif nuclear-localized protein 28-like
270	PGSC0003DMG400002073	0.596823	3.35042	4.62741	18.0086	3.68607	293.397	9.71324	4.9168	2.487e-10	9.3753e-09	UP	52.6588	283.556	-2.4289	8.0376e-05	0.0013151	DOWN	55.6345	10.196	2.448	0.0041596	0.029723	UP	51.839	10.1946	2.3462	0.00057998	0.0025528	UP	65.0749	47.9273	0.44125	0.37962	0.64845	FALSE	67.6409	9.45712	2.8384	0.00027582	0.0041389	UP	GO:0008150//GO:0006810//GO:0051234//GO:0051179	biological_process//transport//establishment of localization//localization	GO:0005575//GO:0005623//GO:0005622//GO:0044464	cellular_component//cell//intracellular//cell part	--	--	no KO assigned | (RefSeq) nuclear transport factor 2
271	PGSC0003DMG400002172	3.45698	14.1172	15.0174	15.8086	12.802	607.195	134.287	2.1768	0.00017413	0.0017257	UP	442.527	586.765	-0.40702	0.31219	0.6671	FALSE	467.369	141.341	1.7254	4.8662e-07	1.6997e-05	UP	512.811	141.361	1.859	4.4569e-05	0.00026602	UP	508.076	475.618	0.095239	0.86053	1	FALSE	526.946	130.912	2.0091	1.008e-08	6.1086e-07	UP	--	--	--	--	--	--	K00799 glutathione S-transferase [EC:2.5.1.18] | (RefSeq) probable glutathione S-transferase
272	PGSC0003DMG400002327	0.3592	2.77409	5.79209	3.85772	4.43267	256.551	24.4217	3.393	2.5083e-05	0.00032324	UP	263.308	247.871	0.087162	0.7897	1	FALSE	278.252	25.7514	3.4337	2.9029e-14	5.2303e-12	UP	174.346	25.6972	2.7623	0.00016523	0.0008497	UP	345.012	161.805	1.0924	0.21568	0.4532	FALSE	357.08	23.8899	3.9018	0.0012794	0.01404	UP	GO:0036211//GO:0009987//GO:0006468//GO:0044238//GO:0019538//GO:0006796//GO:0044267//GO:0043412//GO:0008150//GO:0016310//GO:0043170//GO:0071704//GO:0006464//GO:0044260//GO:0008152//GO:0044237//GO:0006793	protein modification process//cellular process//protein phosphorylation//primary metabolic process//protein metabolic process//phosphate-containing compound metabolic process//cellular protein metabolic process//macromolecule modification//biological_process//phosphorylation//macromolecule metabolic process//organic substance metabolic process//cellular protein modification process//cellular macr…	--	--	GO:0097159//GO:0016773//GO:0001883//GO:0003824//GO:0030554//GO:1901363//GO:0000166//GO:0016772//GO:0016740//GO:0001882//GO:0004672//GO:1901265//GO:0043167//GO:0097367//GO:0036094//GO:0003674//GO:0017076//GO:0043168//GO:0005524//GO:0032553//GO:0016301//GO:0032550//GO:0032549//GO:0032559//GO:0005488//GO:0032555//GO:0035639	organic cyclic compound binding//phosphotransferase activity, alcohol group as acceptor//purine nucleoside binding//catalytic activity//adenyl nucleotide binding//heterocyclic compound binding//nucleotide binding//transferase activity, transferring phosphorus-containing groups//transferase activity//nucleoside binding//protein kinase activity//nucleoside phosphate binding//ion binding//carbohydra…	no KO assigned | (RefSeq) putative receptor-like protein kinase At1g72540
273	PGSC0003DMG400002356	1.90527	0.115303	0.174557	0.149762	0.387603	12.2863	161.737	-3.7185	6.8102e-12	3.3802e-10	DOWN	29.0326	11.9018	1.2865	0.18445	0.50035	FALSE	30.7012	170.361	-2.4722	1.0277e-06	3.2493e-05	DOWN	9.15693	170.487	-4.2186	1.0436e-17	6.3099e-16	DOWN	13.0929	8.47931	0.62676	0.66672	0.89145	FALSE	13.5566	157.642	-3.5396	1.1049e-10	1.1283e-08	DOWN	GO:0051234//GO:0006810//GO:0008150//GO:0009987//GO:0051179//GO:0055085	establishment of localization//transport//biological_process//cellular process//localization//transmembrane transport	GO:0031224//GO:0044425//GO:0016020//GO:0005575//GO:0016021	intrinsic component of membrane//membrane part//membrane//cellular_component//integral component of membrane	GO:0022857//GO:0005215//GO:0003674	transmembrane transporter activity//transporter activity//molecular_function	K08176 MFS transporter, PHS family, inorganic phosphate transporter | (RefSeq) PT5; inorganic phosphate transporter 1-11-like
274	PGSC0003DMG400002387	6.9549	75.3813	66.6347	22.6959	38.4619	1528.68	475.285	1.6854	2.2339e-06	3.8322e-05	UP	2304.1	1478.16	0.64041	0.057144	0.23964	FALSE	2435.44	500.091	2.2839	4.8702e-07	1.6997e-05	UP	4833.48	500.217	3.2724	1.6899e-35	5.1194e-33	UP	3993.14	4477.93	-0.16531	0.51661	0.77784	FALSE	4139.65	463.199	3.1598	6.4217e-07	2.4643e-05	UP	GO:0008152//GO:0032259//GO:0008150	metabolic process//methylation//biological_process	--	--	GO:0003674//GO:0008168//GO:0008171//GO:0016741//GO:0016740//GO:0003824	molecular_function//methyltransferase activity//O-methyltransferase activity//transferase activity, transferring one-carbon groups//transferase activity//catalytic activity	K00588 caffeoyl-CoA O-methyltransferase [EC:2.1.1.104] | (RefSeq) probable caffeoyl-CoA O-methyltransferase At4g26220
275	PGSC0003DMG400002479	72.3974	3016.83	316.555	479.811	551.85	12825.4	1957.85	2.7117	6.3769e-07	1.2544e-05	UP	13173.7	12428.2	0.084039	0.80518	1	FALSE	13922.9	2052.99	2.7617	0.00084201	0.0085166	UP	77918	2051.77	5.247	1.2308e-19	9.6919e-18	UP	7475.77	72052.2	-3.2687	1.0671e-11	8.27e-10	DOWN	7762.65	1905.97	2.026	9.5881e-07	3.4458e-05	UP	GO:0044238//GO:0008150//GO:0071704//GO:0005975//GO:0008152	primary metabolic process//biological_process//organic substance metabolic process//carbohydrate metabolic process//metabolic process	GO:0044464//GO:0043226//GO:0005622//GO:0009536//GO:0005623//GO:0044444//GO:0009501//GO:0043227//GO:0043229//GO:0005575//GO:0043231//GO:0044424//GO:0005737//GO:0009507	cell part//organelle//intracellular//plastid//cell//cytoplasmic part//amyloplast//membrane-bounded organelle//intracellular organelle//cellular_component//intracellular membrane-bounded organelle//intracellular part//cytoplasm//chloroplast	GO:0097159//GO:0005515//GO:1901363//GO:0003824//GO:0016740//GO:0004645//GO:0030170//GO:0016758//GO:0043167//GO:0016757//GO:0008184//GO:0003674//GO:0048037//GO:0043168//GO:0042802//GO:0005488	organic cyclic compound binding//protein binding//heterocyclic compound binding//catalytic activity//transferase activity//phosphorylase activity//pyridoxal phosphate binding//transferase activity, transferring hexosyl groups//ion binding//transferase activity, transferring glycosyl groups//glycogen phosphorylase activity//molecular_function//cofactor binding//anion binding//identical protein bin…	--
276	PGSC0003DMG400002507	5.05778	15.4356	11.7671	24.6491	11.6757	2471.01	519.337	2.2504	2.173e-12	1.166e-10	UP	1063	2393.2	-1.1708	9.197e-05	0.0014727	DOWN	1121.07	546.301	1.0371	0.00018299	0.0025037	UP	1491.61	546.466	1.4487	9.9271e-09	1.3676e-07	UP	1043.49	1380.22	-0.40348	0.11455	0.29687	FALSE	1082.85	506.027	1.0975	0.00014177	0.0024321	UP	GO:0050794//GO:0018130//GO:0010556//GO:0060255//GO:0034654//GO:0019438//GO:0016070//GO:0009889//GO:0034641//GO:0050789//GO:0031323//GO:0044249//GO:0031326//GO:0008150//GO:0006355//GO:0010468//GO:2000112//GO:0032774//GO:0065007//GO:0046483//GO:0044238//GO:0051171//GO:0009987//GO:0090304//GO:0080090//GO:1901362//GO:0010467//GO:0006807//GO:0009058//GO:0044237//GO:0051252//GO:0008152//GO:1903506//GO:…	regulation of cellular process//heterocycle biosynthetic process//regulation of macromolecule biosynthetic process//regulation of macromolecule metabolic process//nucleobase-containing compound biosynthetic process//aromatic compound biosynthetic process//RNA metabolic process//regulation of biosynthetic process//cellular nitrogen compound metabolic process//regulation of biological process//regu…	GO:0005623//GO:0044464//GO:0043226//GO:0005622//GO:0005634//GO:0044424//GO:0043227//GO:0043229//GO:0005575//GO:0043231	cell//cell part//organelle//intracellular//nucleus//intracellular part//membrane-bounded organelle//intracellular organelle//cellular_component//intracellular membrane-bounded organelle	GO:0003677//GO:0003676//GO:1901363//GO:0097159//GO:0005488//GO:0003674	DNA binding//nucleic acid binding//heterocyclic compound binding//organic cyclic compound binding//binding//molecular_function	no KO assigned | (RefSeq) dof zinc finger protein DOF3.1-like
277	PGSC0003DMG400002533	2.16442	5.17783	7.24654	0.512404	12.6268	11.3667	49.4018	-2.1198	0.0036179	0.021122	DOWN	255.837	11.0022	4.5394	2.7397e-17	4.4511e-15	UP	269.766	52.0567	2.3735	2.8179e-08	1.4309e-06	UP	110.295	52.1085	1.0818	0.013373	0.037886	UP	141.379	102.145	0.46895	0.1953	0.42439	FALSE	146.738	48.149	1.6077	0.00066599	0.0084471	UP	--	--	--	--	--	--	no KO assigned | (RefSeq) uncharacterized LOC102582031
278	PGSC0003DMG400002570	1.0586	19.2618	4.80844	18.6029	7.29664	1300.98	74.2049	4.1319	5.967e-12	2.9866e-10	UP	457.88	1260.78	-1.4613	0.0016979	0.016912	DOWN	483.855	77.6389	2.6397	9.1747e-05	0.0014412	UP	1300.83	77.5631	4.0679	6.7985e-43	3.2037e-40	UP	298.867	1204.18	-2.0105	2.2344e-14	2.8862e-12	DOWN	310.215	72.1745	2.1037	1.5132e-07	6.9094e-06	UP	--	--	--	--	--	--	no KO assigned | (RefSeq) protein BIG GRAIN 1-like A
279	PGSC0003DMG400002590	408.801	6.42235	38.5938	10.13	36.7114	978.863	41662.4	-5.4115	6.8857e-06	0.00010538	DOWN	3276.95	948.041	1.7893	0.00099336	0.010961	UP	3453.62	44085	-3.6741	0.0006151	0.00662	DOWN	597.503	44070.4	-6.2047	1.3161e-06	1.1468e-05	DOWN	3316.56	553.04	2.5842	4.456e-09	1.8994e-07	UP	3437.17	40761.9	-3.5679	0.00089736	0.010746	DOWN	GO:0005975//GO:0071704//GO:0008152//GO:0044238//GO:0008150	carbohydrate metabolic process//organic substance metabolic process//metabolic process//primary metabolic process//biological_process	--	--	GO:0003674//GO:0016798//GO:0016787//GO:0005488//GO:0015925//GO:0004553//GO:0004565//GO:0030246//GO:0003824	molecular_function//hydrolase activity, acting on glycosyl bonds//hydrolase activity//binding//galactosidase activity//hydrolase activity, hydrolyzing O-glycosyl compounds//beta-galactosidase activity//carbohydrate binding//catalytic activity	no KO assigned | (RefSeq) beta-galactosidase
280	PGSC0003DMG400002591	57.5439	11.1203	13.2548	14.9522	16.2748	1027.01	4081.91	-1.9908	1.7175e-10	6.6256e-09	DOWN	1023.91	994.28	0.042371	0.94042	1	FALSE	1080.11	4303.79	-1.9944	1.5318e-12	2.0588e-10	DOWN	734.175	4302.64	-2.551	3.5926e-18	2.3186e-16	DOWN	806.256	679.27	0.24725	0.29618	0.55606	FALSE	836.221	3985.06	-2.2526	1.6325e-15	3.9899e-13	DOWN	GO:0008150//GO:0034641//GO:0016070//GO:0090502//GO:0006807//GO:0090305//GO:0010467//GO:0090304//GO:0009987//GO:0046483//GO:0044238//GO:0006396//GO:0006139//GO:1901360//GO:0008152//GO:0044237//GO:0090501//GO:0044260//GO:0006725//GO:0043170//GO:0071704	biological_process//cellular nitrogen compound metabolic process//RNA metabolic process//RNA phosphodiester bond hydrolysis, endonucleolytic//nitrogen compound metabolic process//nucleic acid phosphodiester bond hydrolysis//gene expression//nucleic acid metabolic process//cellular process//heterocycle metabolic process//primary metabolic process//RNA processing//nucleobase-containing compound met…	--	--	GO:0016788//GO:0003824//GO:0032296//GO:0016891//GO:0004518//GO:0004519//GO:0004521//GO:0016787//GO:0004540//GO:0003674//GO:0016893//GO:0004525	hydrolase activity, acting on ester bonds//catalytic activity//double-stranded RNA-specific ribonuclease activity//endoribonuclease activity, producing 5'-phosphomonoesters//nuclease activity//endonuclease activity//endoribonuclease activity//hydrolase activity//ribonuclease activity//molecular_function//endonuclease activity, active with either ribo- or deoxyribonucleic acids and producing 5'-ph…	K11145 ribonuclease III family protein [EC:3.1.26.-] | (RefSeq) mini-ribonuclease 3-like
281	PGSC0003DMG400002675	109.798	276.271	294.8	349.741	279.347	16507.7	5303.03	1.6382	6.3609e-08	1.563e-06	UP	11863.2	15982.4	-0.42999	0.15353	0.44974	FALSE	12542.6	5580.26	1.1684	0.0001135	0.001705	UP	12521.5	5580.68	1.1659	4.0503e-07	3.9554e-06	UP	12342.9	11595.6	0.090103	0.69299	0.90771	FALSE	12806.9	5169.39	1.3089	6.9309e-07	2.6529e-05	UP	GO:0072524//GO:0032787//GO:0006139//GO:1901360//GO:0042278//GO:0006753//GO:0009141//GO:0006793//GO:0009144//GO:0044237//GO:0008152//GO:0046939//GO:0005975//GO:0046496//GO:0046034//GO:0055086//GO:0016052//GO:0009161//GO:0009117//GO:0009132//GO:0071704//GO:0009123//GO:0006725//GO:0016310//GO:0019362//GO:0006096//GO:0006090//GO:0009259//GO:0009135//GO:0009185//GO:1901657//GO:0019693//GO:0034641//GO:…	pyridine-containing compound metabolic process//monocarboxylic acid metabolic process//nucleobase-containing compound metabolic process//organic cyclic compound metabolic process//purine nucleoside metabolic process//nucleoside phosphate metabolic process//nucleoside triphosphate metabolic process//phosphorus metabolic process//purine nucleoside triphosphate metabolic process//cellular metabolic …	--	--	GO:0016832//GO:0016829//GO:0004332//GO:0003674//GO:0003824//GO:0016830	aldehyde-lyase activity//lyase activity//fructose-bisphosphate aldolase activity//molecular_function//catalytic activity//carbon-carbon lyase activity	K01623 fructose-bisphosphate aldolase, class I [EC:4.1.2.13] | (RefSeq) fructose-bisphosphate aldolase-like protein
282	PGSC0003DMG400002693	24.2408	9.95699	7.73995	9.97326	8.41843	1743.31	4452.72	-1.3529	0.00079385	0.0061248	DOWN	1351.26	1690.08	-0.32279	0.28406	0.6345	FALSE	1426.17	4700.72	-1.7207	2.3726e-05	0.00046725	DOWN	1688.1	4700.62	-1.4775	0.0001465	0.00076519	DOWN	1214.63	1563.66	-0.36442	0.11471	0.29718	FALSE	1259.77	4349.17	-1.7876	1.1529e-05	0.00029662	DOWN	GO:0008152//GO:0044237//GO:0006793//GO:0016310//GO:0043170//GO:0071704//GO:0006464//GO:0044260//GO:0044267//GO:0043412//GO:0008150//GO:0036211//GO:0009987//GO:0044238//GO:0006468//GO:0019538//GO:0006796	metabolic process//cellular metabolic process//phosphorus metabolic process//phosphorylation//macromolecule metabolic process//organic substance metabolic process//cellular protein modification process//cellular macromolecule metabolic process//cellular protein metabolic process//macromolecule modification//biological_process//protein modification process//cellular process//primary metabolic proc…	GO:0044425//GO:0016020//GO:0005575//GO:0016021//GO:0031224	membrane part//membrane//cellular_component//integral component of membrane//intrinsic component of membrane	GO:0043168//GO:0005524//GO:0032553//GO:0016301//GO:0032550//GO:0032549//GO:0032559//GO:0032555//GO:0005488//GO:0035639//GO:1901265//GO:0043167//GO:0097367//GO:0036094//GO:0003674//GO:0017076//GO:0001883//GO:0003824//GO:0030554//GO:1901363//GO:0000166//GO:0016772//GO:0016740//GO:0001882//GO:0004672//GO:0097159//GO:0004674//GO:0016773	anion binding//ATP binding//ribonucleotide binding//kinase activity//purine ribonucleoside binding//ribonucleoside binding//adenyl ribonucleotide binding//purine ribonucleotide binding//binding//purine ribonucleoside triphosphate binding//nucleoside phosphate binding//ion binding//carbohydrate derivative binding//small molecule binding//molecular_function//purine nucleotide binding//purine nucleo…	K08832 serine/threonine-protein kinase SRPK3 [EC:2.7.11.1] | (RefSeq) serine/threonine-protein kinase SRPK-like
283	PGSC0003DMG400002699	2.47942	15.9925	22.1631	6.01675	20.027	314.308	130.716	1.2657	0.0070638	0.036121	UP	963.071	304.41	1.6616	4.077e-05	0.00073729	UP	1017.13	137.042	2.8918	1.2319e-08	6.9647e-07	UP	805.87	137.211	2.5541	1.9663e-18	1.3297e-16	UP	1025.63	746.239	0.45881	0.046263	0.15391	FALSE	1064.03	126.993	3.0667	5.6849e-15	1.265e-12	UP	--	--	--	--	--	--	no KO assigned | (RefSeq) F-box protein At5g62510-like
284	PGSC0003DMG400002800	201.954	50.1514	47.5242	92.9636	63.9931	5199.28	11617.6	-1.1599	0.00083933	0.0064174	DOWN	3246.15	5026.67	-0.63088	0.076425	0.29085	FALSE	3419.76	12261.3	-1.8421	2.5834e-06	7.1478e-05	DOWN	2666.47	12260.4	-2.201	1.0077e-07	1.12e-06	DOWN	2361.76	2468.47	-0.063758	0.77751	0.9582	FALSE	2446.44	11346.2	-2.2135	5.078e-08	2.6151e-06	DOWN	GO:0044283//GO:0072351//GO:0030417//GO:0009309//GO:0018130//GO:0019752//GO:0042401//GO:1901564//GO:0008150//GO:0034641//GO:0044249//GO:0009308//GO:1901566//GO:0044281//GO:1901362//GO:0009987//GO:0046483//GO:0043436//GO:0006807//GO:0009058//GO:0072330//GO:0006576//GO:0006082//GO:0008152//GO:0016053//GO:0030418//GO:0044237//GO:1901360//GO:0032787//GO:0044271//GO:0071704//GO:0046394//GO:0044106//GO:…	small molecule biosynthetic process//tricarboxylic acid biosynthetic process//nicotianamine metabolic process//amine biosynthetic process//heterocycle biosynthetic process//carboxylic acid metabolic process//cellular biogenic amine biosynthetic process//organonitrogen compound metabolic process//biological_process//cellular nitrogen compound metabolic process//cellular biosynthetic process//amine…	--	--	GO:0003824//GO:0030410//GO:0016740//GO:0016765//GO:0003674	catalytic activity//nicotianamine synthase activity//transferase activity//transferase activity, transferring alkyl or aryl (other than methyl) groups//molecular_function	K05953 nicotianamine synthase [EC:2.5.1.43] | (RefSeq) nicotianamine synthase
285	PGSC0003DMG400002837	0.324013	3.21154	2.41773	1.52828	1.87992	109.163	23.367	2.2239	4.1472e-05	0.00050043	UP	122.432	105.802	0.21061	0.66356	0.95143	FALSE	129.127	24.4766	2.3993	2.343e-05	0.00046255	UP	222.132	24.4425	3.184	9.3823e-08	1.0507e-06	UP	153.891	205.397	-0.4165	0.24058	0.48685	FALSE	159.644	22.7529	2.8107	6.5012e-08	3.2689e-06	UP	--	--	--	--	--	--	no KO assigned | (RefSeq) uncharacterized protein ycf45
286	PGSC0003DMG400002894	7.10627	49.3362	22.9709	17.7789	20.2026	1361.02	558.049	1.2862	5.1564e-05	0.00060782	UP	1415.06	1318.89	0.10155	0.77381	0.99684	FALSE	1492.38	586.741	1.3468	7.3651e-07	2.4314e-05	UP	3652.68	586.695	2.6383	5.081e-26	7.8158e-24	UP	1562.68	3380.64	-1.1133	1.5503e-06	3.2714e-05	DOWN	1622.27	543.815	1.5768	3.82e-08	2.0231e-06	UP	GO:0044237//GO:0008152//GO:0006793//GO:0071704//GO:0043170//GO:0016310//GO:0044260//GO:0006464//GO:0043412//GO:0044267//GO:0008150//GO:0036211//GO:0044238//GO:0006468//GO:0009987//GO:0006796//GO:0019538	cellular metabolic process//metabolic process//phosphorus metabolic process//organic substance metabolic process//macromolecule metabolic process//phosphorylation//cellular macromolecule metabolic process//cellular protein modification process//macromolecule modification//cellular protein metabolic process//biological_process//protein modification process//primary metabolic process//protein phosp…	--	--	GO:0016301//GO:0005524//GO:0043168//GO:0032553//GO:0032555//GO:0005488//GO:0035639//GO:0032550//GO:0032559//GO:0032549//GO:0097367//GO:0043167//GO:1901265//GO:0017076//GO:0036094//GO:0003674//GO:1901363//GO:0000166//GO:0001883//GO:0030554//GO:0003824//GO:0004672//GO:0016740//GO:0016772//GO:0001882//GO:0004674//GO:0097159//GO:0016773	kinase activity//ATP binding//anion binding//ribonucleotide binding//purine ribonucleotide binding//binding//purine ribonucleoside triphosphate binding//purine ribonucleoside binding//adenyl ribonucleotide binding//ribonucleoside binding//carbohydrate derivative binding//ion binding//nucleoside phosphate binding//purine nucleotide binding//small molecule binding//molecular_function//heterocyclic …	K04733 interleukin-1 receptor-associated kinase 4 [EC:2.7.11.1] | (RefSeq) serine/threonine-protein kinase At5g01020-like
287	PGSC0003DMG400002944	4.6688	12.5461	11.6743	9.93209	11.5236	205.835	97.9364	1.0716	0.010316	0.048399	UP	213.156	198.994	0.099181	0.75502	0.99042	FALSE	224.994	103.047	1.1266	0.0051015	0.034742	UP	247.118	103.086	1.2614	0.00022402	0.0011157	UP	212.054	228.891	-0.11022	0.74441	0.94058	FALSE	220.085	95.4323	1.2055	0.003306	0.029087	UP	--	--	GO:0016020//GO:0016021//GO:0005575//GO:0044425//GO:0031224	membrane//integral component of membrane//cellular_component//membrane part//intrinsic component of membrane	--	--	no KO assigned | (RefSeq) probable sugar phosphate/phosphate translocator At2g25520
288	PGSC0003DMG400003054	102.092	17.4834	14.2237	25.4028	22.0791	1853.62	7801.92	-2.0735	0.00080353	0.006185	DOWN	1452.78	1795.28	-0.30539	0.32923	0.68565	FALSE	1535.09	8242.11	-2.4247	0.00035789	0.0043005	DOWN	1229.81	8238.3	-2.7439	7.7737e-05	0.00043684	DOWN	927.595	1138.53	-0.29561	0.21167	0.44772	FALSE	961.59	7627.08	-2.9876	3.0702e-05	0.0006852	DOWN	GO:0019318//GO:0044238//GO:0008150//GO:0006012//GO:0005975//GO:0071704//GO:0005996//GO:0008152	hexose metabolic process//primary metabolic process//biological_process//galactose metabolic process//carbohydrate metabolic process//organic substance metabolic process//monosaccharide metabolic process//metabolic process	--	--	GO:0016857//GO:0003978//GO:0003824//GO:0016854//GO:0003674//GO:0016853	racemase and epimerase activity, acting on carbohydrates and derivatives//UDP-glucose 4-epimerase activity//catalytic activity//racemase and epimerase activity//molecular_function//isomerase activity	K01784 UDP-glucose 4-epimerase [EC:5.1.3.2] | (RefSeq) STUGE51; UDP-Glc-4-epimerase
289	PGSC0003DMG400003243	463.755	47.3442	132.843	15.7497	173.271	1269.13	38554.5	-4.925	4.6248e-46	5.7388e-43	DOWN	12788.9	1229.69	3.3785	5.6105e-27	2.8105e-24	UP	13485.9	40585.6	-1.5895	1.4876e-11	1.6004e-09	DOWN	3690.36	40577.4	-3.4588	5.3043e-45	2.9712e-42	DOWN	9694.48	3413.68	1.5058	0.0092797	0.045169	UP	10039.8	37602.4	-1.9051	1.3713e-13	2.4209e-11	DOWN	--	--	--	--	--	--	--
290	PGSC0003DMG400003340	255.628	110.789	71.7071	96.8031	97.3257	6135.19	16792.7	-1.4527	0.00011492	0.0012111	DOWN	5576.95	5936.65	-0.090171	0.75026	0.98879	FALSE	5883.98	17727.6	-1.5911	7.69e-05	0.0012441	DOWN	6721.94	17726.3	-1.3989	0.00027373	0.001332	DOWN	4051.26	6224.09	-0.61949	0.0035607	0.02111	FALSE	4198.41	16402.9	-1.966	4.3468e-06	0.00012719	DOWN	GO:0008152//GO:0055114//GO:0008150	metabolic process//oxidation-reduction process//biological_process	GO:0005575//GO:0016021//GO:0016020//GO:0044425//GO:0031224	cellular_component//integral component of membrane//membrane//membrane part//intrinsic component of membrane	GO:0003674//GO:0043167//GO:0046872//GO:0004497//GO:0005488//GO:0005506//GO:0046906//GO:0046914//GO:0097159//GO:0043169//GO:0016705//GO:0016491//GO:0003824//GO:1901363//GO:0020037	molecular_function//ion binding//metal ion binding//monooxygenase activity//binding//iron ion binding//tetrapyrrole binding//transition metal ion binding//organic cyclic compound binding//cation binding//oxidoreductase activity, acting on paired donors, with incorporation or reduction of molecular oxygen//oxidoreductase activity//catalytic activity//heterocyclic compound binding//heme binding	no KO assigned | (RefSeq) cytochrome P450 CYP82D47-like
291	PGSC0003DMG400003543	0.279783	1.07034	2.06984	2.30119	2.59861	160.597	20.3877	2.9777	2.4731e-06	4.2086e-05	UP	162.82	155.744	0.064101	0.87646	1	FALSE	172.477	21.4808	3.0053	0.0051997	0.035273	UP	72.6643	21.4504	1.7602	0.0011295	0.0045569	UP	128.026	67.2703	0.9284	0.035499	0.12652	FALSE	132.951	19.92	2.7386	3.4832e-05	0.0007648	UP	--	--	--	--	--	--	no KO assigned | (RefSeq) probably inactive leucine-rich repeat receptor-like protein kinase IMK2
292	PGSC0003DMG400003547	130.586	62.8084	55.4847	58.309	57.259	4174.9	9739.48	-1.2221	0.0096675	0.046105	DOWN	3733.79	4040.53	-0.1139	0.65999	0.94953	FALSE	3940.3	10289	-1.3847	0.0058764	0.038562	DOWN	4312.09	10287.5	-1.2544	0.010349	0.030437	DOWN	3538.33	3993.38	-0.17454	0.39433	0.66348	FALSE	3668.07	9518.09	-1.3757	0.0057541	0.043981	DOWN	--	--	GO:0016021//GO:0005575//GO:0016020//GO:0044425//GO:0031224	integral component of membrane//cellular_component//membrane//membrane part//intrinsic component of membrane	--	--	no KO assigned | (RefSeq) UPF0183 protein At3g51130
293	PGSC0003DMG400003666	613.584	130.972	101.236	73.7104	136.427	3236.32	28038.1	-3.115	2.2982e-14	1.6572e-12	DOWN	5503.08	3134.14	0.81217	0.0069325	0.051245	FALSE	5805.85	29580.2	-2.3491	1.1185e-09	8.0226e-08	DOWN	5550.27	29572.5	-2.4136	3.4815e-10	6.4842e-09	DOWN	4021.06	5135.97	-0.35306	0.26478	0.51787	FALSE	4163.23	27382.4	-2.7175	3.3467e-11	3.7515e-09	DOWN	--	--	--	--	--	--	no KO assigned | (RefSeq) thiosulfate sulfurtransferase 16, chloroplastic
294	PGSC0003DMG400003688	50.5434	8.34262	13.5762	2.70721	18.6997	88.3325	1694.87	-4.2621	1.5967e-08	4.3827e-07	DOWN	556.815	85.6991	2.6998	1.5868e-08	6.6239e-07	UP	588.542	1778.53	-1.5955	0.0025251	0.020231	DOWN	266.126	1778.14	-2.7402	7.7997e-06	5.5932e-05	DOWN	398.567	246.214	0.69491	0.016948	0.07212	FALSE	413.461	1650	-1.9966	0.00042006	0.0057932	DOWN	--	--	--	--	--	--	no KO assigned | (RefSeq) uncharacterized LOC102595392
295	PGSC0003DMG400003707	4204.62	1432.88	1476.34	1356.5	1685.19	75378.3	244274	-1.6963	0.00088535	0.0067024	DOWN	85794.4	72996.9	0.23305	0.4577	0.80712	FALSE	90518.4	257997	-1.5111	0.0027347	0.021524	DOWN	76721.7	257922	-1.7492	0.00082685	0.0034755	DOWN	73359.5	71036.6	0.046422	0.86979	1	FALSE	76047	238725	-1.6504	0.001325	0.014412	DOWN	GO:0071704//GO:0043170//GO:0006508//GO:0008152//GO:0019538//GO:0044238//GO:0008150	organic substance metabolic process//macromolecule metabolic process//proteolysis//metabolic process//protein metabolic process//primary metabolic process//biological_process	GO:0043229//GO:0043231//GO:0005575//GO:0043227//GO:0000323//GO:0044424//GO:0005737//GO:0005622//GO:0043226//GO:0044464//GO:0005773//GO:0005623//GO:0044444	intracellular organelle//intracellular membrane-bounded organelle//cellular_component//membrane-bounded organelle//lytic vacuole//intracellular part//cytoplasm//intracellular//organelle//cell part//vacuole//cell//cytoplasmic part	GO:0008233//GO:0003674//GO:0008234//GO:0016787//GO:0070011//GO:0003824	peptidase activity//molecular_function//cysteine-type peptidase activity//hydrolase activity//peptidase activity, acting on L-amino acid peptides//catalytic activity	K01373 cathepsin F [EC:3.4.22.41] | (RefSeq) cysteine proteinase 15A-like
296	PGSC0003DMG400003727	24.1657	9.98541	10.1184	7.85496	13.2237	539.161	1717.4	-1.6714	1.7703e-07	4.0062e-06	DOWN	824.061	522.193	0.65817	0.039876	0.18718	FALSE	870.474	1810.11	-1.0562	6.1697e-05	0.0010309	DOWN	660.776	1809.97	-1.4537	3.9302e-09	5.896e-08	DOWN	618.781	611.775	0.016427	0.94752	1	FALSE	641.755	1675.97	-1.3849	1.1444e-06	4.0192e-05	DOWN	--	--	GO:0005575//GO:0016020	cellular_component//membrane	--	--	K17338 receptor expression-enhancing protein 1/2/3/4 | (RefSeq) putative HVA22-like protein g
297	PGSC0003DMG400003735	89.9122	24.1389	32.9115	23.0737	36.2542	1948.46	7784.28	-1.9982	7.2337e-11	2.9879e-09	DOWN	2778.98	1885.33	0.55974	0.059105	0.24474	FALSE	2933.35	8199.79	-1.483	7.4884e-10	5.6133e-08	DOWN	1953.59	8200.37	-2.0696	1.5323e-18	1.0579e-16	DOWN	2461.46	1807.72	0.44534	0.048628	0.15948	FALSE	2552.18	7592.77	-1.5729	3.2338e-09	2.1815e-07	DOWN	GO:0055085//GO:0051179//GO:0009987//GO:0008150//GO:0051234//GO:0006810	transmembrane transport//localization//cellular process//biological_process//establishment of localization//transport	GO:0016021//GO:0005575//GO:0016020//GO:0044425//GO:0031224	integral component of membrane//cellular_component//membrane//membrane part//intrinsic component of membrane	GO:0003674//GO:0005215//GO:0022857	molecular_function//transporter activity//transmembrane transporter activity	K08145 MFS transporter, SP family, solute carrier family 2 (facilitated glucose transporter), member 8 | (RefSeq) sugar transporter ERD6-like 6
298	PGSC0003DMG400003803	0.00851224	3.67781	1.86268	2.07287	1.79621	77.0871	0.339252	7.828	4.2083e-05	0.00050658	UP	59.7781	74.3824	-0.31534	0.66308	0.95101	FALSE	63.0048	0.361769	7.4442	2.5503e-09	1.6475e-07	UP	128.34	0.361026	8.4736	3.7111e-05	0.00022595	UP	60.7829	119.072	-0.97009	0.28519	0.54352	FALSE	62.9553	0.334037	7.5582	2.7211e-10	2.4586e-08	UP	--	--	--	--	--	--	no KO assigned | (RefSeq) uncharacterized LOC102602980
299	PGSC0003DMG400003804	0.853915	4.97217	3.96402	3.42599	4.6062	199.38	50.5704	1.9792	0.00041312	0.0035487	UP	244.161	192.832	0.34049	0.4332	0.78625	FALSE	257.569	53.2538	2.274	2.6736e-06	7.3497e-05	UP	275.313	53.2579	2.37	3.5088e-11	7.8205e-10	UP	201.712	254.842	-0.3373	0.34082	0.60637	FALSE	209.209	49.3173	2.0848	1.7579e-06	5.7535e-05	UP	--	--	--	--	--	--	--
300	PGSC0003DMG400003805	19.856	123.955	79.8759	87.1266	62.5892	7077.73	1663.08	2.0894	1.2197e-11	5.7578e-10	UP	4629.41	6853.95	-0.56611	0.046039	0.20727	FALSE	4885.68	1752.22	1.4794	1.9441e-09	1.2979e-07	UP	9668.99	1752.75	2.4637	1.7122e-21	1.6776e-19	UP	5747.36	8961.89	-0.6409	0.0034717	0.02066	FALSE	5965.36	1621.97	1.8789	2.8122e-12	3.9e-10	UP	--	--	--	--	--	--	no KO assigned | (RefSeq) uncharacterized LOC102603657
301	PGSC0003DMG400003812	2.8399	20.4875	18.4563	32.3895	13.9264	2564.67	226.219	3.503	4.9934e-13	2.9861e-11	UP	995.427	2479.93	-1.3169	0.00014608	0.00218	DOWN	1051.56	237.64	2.1457	6.2559e-13	9.039e-11	UP	1542.25	237.669	2.698	7.7843e-24	9.5103e-22	UP	1290.46	1429.11	-0.14723	0.45522	0.72264	FALSE	1338.7	220.289	2.6034	1.0275e-12	1.5711e-10	UP	--	--	--	--	--	--	no KO assigned | (RefSeq) uncharacterized LOC102606004
302	PGSC0003DMG400003848	89.6307	10.3729	22.3032	27.4071	19.7056	1745.31	5888.81	-1.7545	1.1476e-08	3.2488e-07	DOWN	1137.01	1689.96	-0.57174	0.060302	0.24794	FALSE	1201.6	6204.61	-2.3684	1.2234e-20	5.9019e-18	DOWN	634.533	6203.21	-3.2892	4.507e-39	1.7841e-36	DOWN	1263.16	588.107	1.1029	1.0155e-05	0.00016405	UP	1310.31	5746.52	-2.1328	5.4594e-15	1.2332e-12	DOWN	GO:0072511//GO:0006811//GO:0006829//GO:0006812//GO:0055085//GO:0009987//GO:0070838//GO:0000041//GO:0051179//GO:0030001//GO:0051234//GO:0006810//GO:0008150	divalent inorganic cation transport//ion transport//zinc ion transport//cation transport//transmembrane transport//cellular process//divalent metal ion transport//transition metal ion transport//localization//metal ion transport//establishment of localization//transport//biological_process	GO:0016020//GO:0043227//GO:0031090//GO:0098588//GO:0043231//GO:0098805//GO:0005575//GO:0044446//GO:0043229//GO:0005774//GO:0016021//GO:0044422//GO:0009507//GO:0044425//GO:0005737//GO:0044424//GO:0009705//GO:0031224//GO:0043226//GO:0000325//GO:0044464//GO:0005622//GO:0044437//GO:0044444//GO:0005623//GO:0009536//GO:0005773	membrane//membrane-bounded organelle//organelle membrane//bounding membrane of organelle//intracellular membrane-bounded organelle//whole membrane//cellular_component//intracellular organelle part//intracellular organelle//vacuolar membrane//integral component of membrane//organelle part//chloroplast//membrane part//cytoplasm//intracellular part//plant-type vacuole membrane//intrinsic component o…	GO:0003674//GO:0005215//GO:0022857	molecular_function//transporter activity//transmembrane transporter activity	K08145 MFS transporter, SP family, solute carrier family 2 (facilitated glucose transporter), member 8 | (RefSeq) sugar transporter ERD6-like 7
303	PGSC0003DMG400003918	65.2313	15.5493	18.9708	7.10671	20.9209	1292.67	12317.3	-3.2523	1.8797e-15	1.5464e-13	DOWN	3478.6	1251.33	1.475	1.1323e-06	3.1308e-05	UP	3668.07	12999.5	-1.8254	3.1478e-07	1.1538e-05	DOWN	2720.11	13001.7	-2.257	3.0034e-09	4.6009e-08	DOWN	3071.21	2516.29	0.28751	0.19656	0.4262	FALSE	3183.09	12026.3	-1.9177	8.2315e-08	4.0435e-06	DOWN	GO:0008152//GO:0009058//GO:0008150	metabolic process//biosynthetic process//biological_process	GO:0016021//GO:0005575//GO:0016020//GO:0044425//GO:0031224	integral component of membrane//cellular_component//membrane//membrane part//intrinsic component of membrane	GO:0048037//GO:0003674//GO:0030170//GO:0043167//GO:0005488//GO:0043168//GO:0097159//GO:1901363//GO:0003824	cofactor binding//molecular_function//pyridoxal phosphate binding//ion binding//binding//anion binding//organic cyclic compound binding//heterocyclic compound binding//catalytic activity	K14270 aminotransferase | (RefSeq) probable aminotransferase ACS10
304	PGSC0003DMG400003939	1.00654	4.67375	4.78329	11.9631	3.0973	1271.19	107.47	3.5642	0.0028475	0.017402	UP	292.006	1227.7	-2.0719	0.034904	0.17008	FALSE	308.344	113.134	1.4465	0.00011645	0.0017401	UP	468.464	113.206	2.049	6.8484e-05	0.00039017	UP	445.829	433.544	0.040314	0.94603	1	FALSE	462.072	104.724	2.1415	1.0112e-08	6.116e-07	UP	GO:0044238//GO:0019538//GO:0008150//GO:0043170//GO:0071704//GO:0008152//GO:0006508	primary metabolic process//protein metabolic process//biological_process//macromolecule metabolic process//organic substance metabolic process//metabolic process//proteolysis	--	--	GO:0070011//GO:0003824//GO:0017171//GO:0008236//GO:0003674//GO:0008233//GO:0004252//GO:0004175//GO:0016787	peptidase activity, acting on L-amino acid peptides//catalytic activity//serine hydrolase activity//serine-type peptidase activity//molecular_function//peptidase activity//serine-type endopeptidase activity//endopeptidase activity//hydrolase activity	no KO assigned | (RefSeq) subtilisin-like protease SBT1.7
305	PGSC0003DMG400003982	0.386076	3.42302	2.41597	4.82583	1.59889	457.05	37.8515	3.5939	4.8208e-05	0.00057358	UP	133.953	441.496	-1.7207	0.013246	0.083534	FALSE	141.545	40.059	1.8211	0.00021944	0.0028964	UP	306.095	40.0511	2.9341	0.00029832	0.0014371	UP	203.078	283.72	-0.48243	0.39095	0.65978	FALSE	210.428	37.0316	2.5065	0.0044666	0.036428	UP	GO:0019538//GO:0008037//GO:0006796//GO:0048544//GO:0036211//GO:0009987//GO:0006468//GO:0044238//GO:0008150//GO:0044267//GO:0009856//GO:0043412//GO:0051704//GO:0006464//GO:0044260//GO:0016310//GO:0032501//GO:0009875//GO:0022414//GO:0044703//GO:0044706//GO:0007154//GO:0043170//GO:0071704//GO:0006793//GO:0008152//GO:0044237	protein metabolic process//cell recognition//phosphate-containing compound metabolic process//recognition of pollen//protein modification process//cellular process//protein phosphorylation//primary metabolic process//biological_process//cellular protein metabolic process//pollination//macromolecule modification//multi-organism process//cellular protein modification process//cellular macromolecule…	GO:0031224//GO:0005575//GO:0016021//GO:0016020//GO:0044425	intrinsic component of membrane//cellular_component//integral component of membrane//membrane//membrane part	GO:0016773//GO:0097159//GO:0016772//GO:0016740//GO:0001882//GO:0004672//GO:0001883//GO:0003824//GO:0030554//GO:1901363//GO:0000166//GO:0036094//GO:0003674//GO:0017076//GO:1901265//GO:0043167//GO:0097367//GO:0032550//GO:0032549//GO:0032559//GO:0005488//GO:0032555//GO:0035639//GO:0043168//GO:0005524//GO:0032553//GO:0016301	phosphotransferase activity, alcohol group as acceptor//organic cyclic compound binding//transferase activity, transferring phosphorus-containing groups//transferase activity//nucleoside binding//protein kinase activity//purine nucleoside binding//catalytic activity//adenyl nucleotide binding//heterocyclic compound binding//nucleotide binding//small molecule binding//molecular_function//purine nu…	no KO assigned | (RefSeq) G-type lectin S-receptor-like serine/threonine-protein kinase RLK1
306	PGSC0003DMG400003984	243.308	64.0836	130.356	106.182	117.613	8569.86	20233	-1.2394	3.3573e-05	0.00041643	DOWN	8616.97	8290.64	0.055697	0.86594	1	FALSE	9094.16	21341.1	-1.2306	2.0519e-07	8.0222e-06	DOWN	4941.81	21344.2	-2.1107	1.1153e-14	4.267e-13	DOWN	9332.71	4577.1	1.0279	4.3481e-06	7.9448e-05	UP	9674.54	19748.9	-1.0295	6.6707e-05	0.0013086	DOWN	--	--	--	--	--	--	K08770 ubiquitin C | (RefSeq) ubiquitin; polyubiquitin-like
307	PGSC0003DMG400004000	0.584492	3.80932	2.66307	6.88318	2.3791	503.629	43.4397	3.5353	3.1469e-05	0.0003941	UP	154.805	486.492	-1.652	0.011176	0.073756	FALSE	163.534	45.7918	1.8364	0.00012408	0.0018254	UP	263.536	45.7932	2.5248	0.0023192	0.0084845	UP	171.473	244.172	-0.50991	0.36641	0.63384	FALSE	177.871	42.3907	2.069	0.00013718	0.0023656	UP	GO:0048544//GO:0006796//GO:0008037//GO:0019538//GO:0009987//GO:0006468//GO:0044238//GO:0036211//GO:0008150//GO:0043412//GO:0009856//GO:0044267//GO:0006464//GO:0044260//GO:0051704//GO:0007154//GO:0043170//GO:0071704//GO:0022414//GO:0044706//GO:0044703//GO:0032501//GO:0009875//GO:0016310//GO:0006793//GO:0044237//GO:0008152	recognition of pollen//phosphate-containing compound metabolic process//cell recognition//protein metabolic process//cellular process//protein phosphorylation//primary metabolic process//protein modification process//biological_process//macromolecule modification//pollination//cellular protein metabolic process//cellular protein modification process//cellular macromolecule metabolic process//mult…	--	--	GO:0016773//GO:0097159//GO:0004672//GO:0001882//GO:0016772//GO:0016740//GO:0000166//GO:1901363//GO:0003824//GO:0030554//GO:0001883//GO:0017076//GO:0003674//GO:0036094//GO:0097367//GO:1901265//GO:0043167//GO:0035639//GO:0005488//GO:0032555//GO:0032549//GO:0032559//GO:0032550//GO:0016301//GO:0032553//GO:0043168//GO:0005524	phosphotransferase activity, alcohol group as acceptor//organic cyclic compound binding//protein kinase activity//nucleoside binding//transferase activity, transferring phosphorus-containing groups//transferase activity//nucleotide binding//heterocyclic compound binding//catalytic activity//adenyl nucleotide binding//purine nucleoside binding//purine nucleotide binding//molecular_function//small …	no KO assigned | (RefSeq) G-type lectin S-receptor-like serine/threonine-protein kinase RLK1
308	PGSC0003DMG400004028	2.11857	5.1	6.23788	4.60348	6.76958	414.185	194.316	1.0919	0.0024521	0.015416	UP	558.429	400.992	0.4778	0.17524	0.4854	FALSE	588.988	204.306	1.5275	1.2911e-05	0.00028456	UP	441.229	204.402	1.1101	0.00018839	0.00095636	UP	493.826	408.382	0.27408	0.25665	0.50692	FALSE	512.644	189.25	1.4377	2.6131e-05	0.00060259	UP	--	--	GO:0043226//GO:0044464//GO:0005622//GO:0044444//GO:0005623//GO:0043227//GO:0005739//GO:0043231//GO:0005575//GO:0043229//GO:0005737//GO:0044424	organelle//cell part//intracellular//cytoplasmic part//cell//membrane-bounded organelle//mitochondrion//intracellular membrane-bounded organelle//cellular_component//intracellular organelle//cytoplasm//intracellular part	--	--	no KO assigned | (RefSeq) uncharacterized LOC102583668
309	PGSC0003DMG400004035	0.329383	22.8288	3.26019	13.7849	2.12053	992.938	24.4718	5.3425	8.8351e-25	1.949e-22	UP	140.539	962.145	-2.7753	1.9442e-11	1.3685e-09	DOWN	148.277	25.7641	2.5249	2.8484e-06	7.766e-05	UP	1593.11	25.7497	5.9511	6.1837e-13	1.8714e-11	UP	204.789	1471.73	-2.8453	1.3462e-05	0.00020769	DOWN	213.051	23.8781	3.1574	0.0066216	0.048768	UP	GO:0006464//GO:0044260//GO:0016310//GO:0043170//GO:0071704//GO:0006793//GO:0008152//GO:0044237//GO:0019538//GO:0006796//GO:0036211//GO:0009987//GO:0044238//GO:0006468//GO:0008150//GO:0043412//GO:0044267	cellular protein modification process//cellular macromolecule metabolic process//phosphorylation//macromolecule metabolic process//organic substance metabolic process//phosphorus metabolic process//metabolic process//cellular metabolic process//protein metabolic process//phosphate-containing compound metabolic process//protein modification process//cellular process//primary metabolic process//pro…	--	--	GO:0036094//GO:0003674//GO:0017076//GO:1901265//GO:0043167//GO:0097367//GO:0032550//GO:0032549//GO:0032559//GO:0032555//GO:0005488//GO:0035639//GO:0043168//GO:0005524//GO:0032553//GO:0016301//GO:0016773//GO:0097159//GO:0004674//GO:0016772//GO:0016740//GO:0001882//GO:0004672//GO:0001883//GO:0003824//GO:0030554//GO:1901363//GO:0000166	small molecule binding//molecular_function//purine nucleotide binding//nucleoside phosphate binding//ion binding//carbohydrate derivative binding//purine ribonucleoside binding//ribonucleoside binding//adenyl ribonucleotide binding//purine ribonucleotide binding//binding//purine ribonucleoside triphosphate binding//anion binding//ATP binding//ribonucleotide binding//kinase activity//phosphotransf…	no KO assigned | (RefSeq) mitogen-activated protein kinase kinase kinase NPK1-like
310	PGSC0003DMG400004061	0.703964	4.1376	3.64413	1.94242	3.58534	207.763	76.6789	1.438	0.00063103	0.0050477	UP	350.24	201.287	0.79909	0.031749	0.15897	FALSE	369.728	80.5311	2.1988	7.7522e-09	4.5109e-07	UP	426.022	80.4881	2.4041	7.7836e-14	2.6319e-12	UP	346.222	394.687	-0.18901	0.54207	0.79992	FALSE	359.033	74.7101	2.2647	3.0319e-09	2.0593e-07	UP	--	--	--	--	GO:0003674//GO:0005488//GO:0005515//GO:0046983	molecular_function//binding//protein binding//protein dimerization activity	no KO assigned | (RefSeq) transcription factor BIM1-like
311	PGSC0003DMG400004062	4.68128	23.3465	16.4927	27.1782	15.1529	1659.56	291.646	2.5085	3.5037e-06	5.7585e-05	UP	836.226	1608.41	-0.94367	0.03214	0.16028	FALSE	884.305	306.33	1.5295	0.00012806	0.0018684	UP	1377.81	306.336	2.1692	1.8302e-16	9.4494e-15	UP	886.303	1275.08	-0.52472	0.11304	0.29408	FALSE	921.018	284.009	1.6973	0.0036389	0.031223	UP	GO:0044271//GO:1901360//GO:0006139//GO:1903506//GO:0008152//GO:0051252//GO:0044237//GO:0009059//GO:0019219//GO:2001141//GO:0044260//GO:1901576//GO:0006725//GO:0019222//GO:0034645//GO:0006351//GO:0043170//GO:0097659//GO:0071704//GO:0065007//GO:0032774//GO:2000112//GO:0010468//GO:0006355//GO:0008150//GO:0031326//GO:0044249//GO:0031323//GO:0050789//GO:0034641//GO:0009889//GO:0016070//GO:0019438//GO:…	cellular nitrogen compound biosynthetic process//organic cyclic compound metabolic process//nucleobase-containing compound metabolic process//regulation of nucleic acid-templated transcription//metabolic process//regulation of RNA metabolic process//cellular metabolic process//macromolecule biosynthetic process//regulation of nucleobase-containing compound metabolic process//regulation of RNA bio…	GO:0044424//GO:0043231//GO:0005575//GO:0043229//GO:0043227//GO:0005623//GO:0005634//GO:0005622//GO:0043226//GO:0044464	intracellular part//intracellular membrane-bounded organelle//cellular_component//intracellular organelle//membrane-bounded organelle//cell//nucleus//intracellular//organelle//cell part	GO:0005488//GO:0003674//GO:0044212//GO:0001067//GO:1901363//GO:0003676//GO:0003677//GO:0097159	binding//molecular_function//transcription regulatory region DNA binding//regulatory region nucleic acid binding//heterocyclic compound binding//nucleic acid binding//DNA binding//organic cyclic compound binding	no KO assigned | (RefSeq) dof zinc finger protein DOF3.1-like
312	PGSC0003DMG400004065	79.4709	25.6448	33.0034	20.5298	32.9865	953.138	3822.55	-2.0038	1.4895e-09	4.9016e-08	DOWN	1401.02	922.604	0.60269	0.05673	0.23877	FALSE	1477.51	4033.3	-1.4488	1.079e-05	0.00024374	DOWN	1142.41	4032.93	-1.8198	6.3565e-08	7.3694e-07	DOWN	1359.23	1057.72	0.36183	0.12271	0.31147	FALSE	1409.23	3732.77	-1.4053	8.2268e-06	0.0002234	DOWN	GO:0008150//GO:0051234//GO:0006810//GO:0015866//GO:0071705//GO:0015865//GO:0051179//GO:0006820//GO:0015931//GO:1901264//GO:0009987//GO:0055085//GO:0015858//GO:0006862//GO:0015868//GO:0071702//GO:0015711//GO:0006811//GO:0051503//GO:0015748//GO:0015867	biological_process//establishment of localization//transport//ADP transport//nitrogen compound transport//purine nucleotide transport//localization//anion transport//nucleobase-containing compound transport//carbohydrate derivative transport//cellular process//transmembrane transport//nucleoside transport//nucleotide transport//purine ribonucleotide transport//organic substance transport//organic…	GO:0031967//GO:0005743//GO:0019866//GO:0005623//GO:0044444//GO:0005622//GO:0043226//GO:0044464//GO:0005740//GO:0031975//GO:0031224//GO:0031966//GO:0044424//GO:0044425//GO:0005737//GO:0044446//GO:0043229//GO:0016021//GO:0044422//GO:0043231//GO:0005575//GO:0044429//GO:0005739//GO:0043227//GO:0031090//GO:0016020	organelle envelope//mitochondrial inner membrane//organelle inner membrane//cell//cytoplasmic part//intracellular//organelle//cell part//mitochondrial envelope//envelope//intrinsic component of membrane//mitochondrial membrane//intracellular part//membrane part//cytoplasm//intracellular organelle part//intracellular organelle//integral component of membrane//organelle part//intracellular membrane…	GO:0005215//GO:0003674	transporter activity//molecular_function	K05863 solute carrier family 25 (mitochondrial adenine nucleotide translocator), member 4/5/6/31 | (RefSeq) ADP,ATP carrier protein ER-ANT1
313	PGSC0003DMG400004082	0.624659	7.03067	4.65838	2.12268	7.36797	110.827	32.7118	1.7604	0.00096693	0.0072207	UP	349.821	107.405	1.7036	0.00045212	0.0056677	UP	368.548	34.2208	3.4289	1.8235e-08	9.8626e-07	UP	354.732	34.1537	3.3766	2.3782e-20	2.0347e-18	UP	217.822	328.31	-0.59191	0.052372	0.16811	FALSE	225.802	31.8472	2.8258	1.1853e-09	8.9928e-08	UP	GO:0051252//GO:0008152//GO:0044237//GO:0006139//GO:1901360//GO:1903506//GO:0044271//GO:0019222//GO:0006725//GO:0043170//GO:0006351//GO:0034645//GO:0071704//GO:0097659//GO:0019219//GO:0009059//GO:2001141//GO:1901576//GO:0044260//GO:0034654//GO:0019438//GO:0010556//GO:0060255//GO:0018130//GO:0050794//GO:0006355//GO:0031326//GO:0008150//GO:0065007//GO:0010468//GO:2000112//GO:0032774//GO:0009889//GO:…	regulation of RNA metabolic process//metabolic process//cellular metabolic process//nucleobase-containing compound metabolic process//organic cyclic compound metabolic process//regulation of nucleic acid-templated transcription//cellular nitrogen compound biosynthetic process//regulation of metabolic process//cellular aromatic compound metabolic process//macromolecule metabolic process//transcrip…	GO:0044424//GO:0043227//GO:0005575//GO:0043231//GO:0043229//GO:0005623//GO:0044464//GO:0043226//GO:0005622//GO:0005634	intracellular part//membrane-bounded organelle//cellular_component//intracellular membrane-bounded organelle//intracellular organelle//cell//cell part//organelle//intracellular//nucleus	GO:0005488//GO:0003674//GO:0003676//GO:0003677//GO:1901363//GO:0097159	binding//molecular_function//nucleic acid binding//DNA binding//heterocyclic compound binding//organic cyclic compound binding	no KO assigned | (RefSeq) transcription factor TCP5-like
314	PGSC0003DMG400004109	0.306338	12.3641	13.0147	13.2901	10.7249	577.621	13.4003	5.4298	0.00079968	0.0061633	UP	416.445	557.175	-0.42	0.60437	0.91727	FALSE	438.458	14.1242	4.9562	8.6608e-11	8.0446e-09	UP	503.554	14.1172	5.1566	5.1518e-38	1.8652e-35	UP	480.6	466.242	0.043757	0.80837	0.97269	FALSE	498.959	13.0832	5.2531	2.7356e-05	0.00062503	UP	GO:0044036//GO:0008152//GO:0044237//GO:0044264//GO:0016049//GO:0009831//GO:0071669//GO:0044260//GO:0042546//GO:0005975//GO:0044262//GO:0009827//GO:0044042//GO:0010411//GO:0071704//GO:0043170//GO:0008150//GO:0042545//GO:0044085//GO:0009825//GO:0042547//GO:0009664//GO:0071555//GO:0045229//GO:0040007//GO:0010383//GO:0071840//GO:0071554//GO:0010410//GO:0005976//GO:0016043//GO:0044238//GO:0009987//GO:…	cell wall macromolecule metabolic process//metabolic process//cellular metabolic process//cellular polysaccharide metabolic process//cell growth//plant-type cell wall modification involved in multidimensional cell growth//plant-type cell wall organization or biogenesis//cellular macromolecule metabolic process//cell wall biogenesis//carbohydrate metabolic process//cellular carbohydrate metabolic …	GO:0005887//GO:0071944//GO:0044425//GO:0031226//GO:0005575//GO:0016021//GO:0030312//GO:0005886//GO:0016020//GO:0048046//GO:0005623//GO:0005618//GO:0005576//GO:0044459//GO:0031224//GO:0044464	integral component of plasma membrane//cell periphery//membrane part//intrinsic component of plasma membrane//cellular_component//integral component of membrane//external encapsulating structure//plasma membrane//membrane//apoplast//cell//cell wall//extracellular region//plasma membrane part//intrinsic component of membrane//cell part	GO:0016798//GO:0016787//GO:0004553//GO:0003674//GO:0016757//GO:0016758//GO:0016740//GO:0003824//GO:0016762	hydrolase activity, acting on glycosyl bonds//hydrolase activity//hydrolase activity, hydrolyzing O-glycosyl compounds//molecular_function//transferase activity, transferring glycosyl groups//transferase activity, transferring hexosyl groups//transferase activity//catalytic activity//xyloglucan:xyloglucosyl transferase activity	K08235 xyloglucan:xyloglucosyl transferase [EC:2.4.1.207] | (RefSeq) probable xyloglucan endotransglucosylase/hydrolase protein 33
315	PGSC0003DMG400004233	2.13718	0.431189	0.414795	0.72164	0.745076	32.6711	100.736	-1.6245	0.0023522	0.014905	DOWN	30.931	31.6665	-0.033902	0.94209	1	FALSE	32.5425	106.172	-1.706	0.0026354	0.020908	DOWN	18.8918	106.176	-2.4906	9.7243e-07	8.7642e-06	DOWN	16.7259	17.5012	-0.065375	0.9378	1	FALSE	17.3873	98.2927	-2.499	4.3554e-05	0.00091906	DOWN	GO:0008150//GO:0051234//GO:0006810//GO:0009987//GO:0051179//GO:0055085	biological_process//establishment of localization//transport//cellular process//localization//transmembrane transport	GO:0031224//GO:0044425//GO:0016020//GO:0005575//GO:0016021	intrinsic component of membrane//membrane part//membrane//cellular_component//integral component of membrane	GO:0022857//GO:0005215//GO:0003674	transmembrane transporter activity//transporter activity//molecular_function	no KO assigned | (RefSeq) WAT1-related protein At1g09380-like
316	PGSC0003DMG400004251	0.261605	1.65465	1.33001	1.19492	1.59961	82.0213	18.555	2.1442	0.00045999	0.0038709	UP	98.8014	79.2697	0.31776	0.5248	0.86265	FALSE	104.216	19.618	2.4093	7.9542e-05	0.0012793	UP	107.547	19.6259	2.4541	6.5019e-07	6.0835e-06	UP	80.0842	99.6325	-0.3151	0.46506	0.73154	FALSE	83.06	18.1313	2.1957	0.00049844	0.0066675	UP	--	--	--	--	--	--	no KO assigned | (RefSeq) uncharacterized LOC102592658
317	PGSC0003DMG400004267	1.61613	0.234468	0.678158	0.659888	0.421331	48.6673	123.62	-1.3449	0.0057411	0.030707	DOWN	28.505	47.0743	-0.72372	0.29324	0.64599	FALSE	30.1004	130.558	-2.1168	9.9568e-05	0.0015358	DOWN	16.6343	130.59	-2.9728	2.0855e-07	2.1603e-06	DOWN	44.0912	15.346	1.5226	0.036866	0.13038	FALSE	45.774	120.739	-1.3993	0.0062774	0.046746	DOWN	--	--	--	--	--	--	--
318	PGSC0003DMG400004312	0.482262	2.19256	3.89207	2.47233	3.71178	230.271	44.8502	2.3601	0.0029869	0.018116	UP	311.039	222.684	0.4821	0.2384	0.57712	FALSE	328.85	47.0552	2.805	2.4561e-11	2.5072e-09	UP	194.284	47.0425	2.0461	5.604e-06	4.1551e-05	UP	315.401	179.662	0.8119	0.097434	0.26422	FALSE	327.791	43.6605	2.9084	3.8124e-05	0.00082253	UP	GO:0008152//GO:0008150//GO:0055114	metabolic process//biological_process//oxidation-reduction process	--	--	GO:0005488//GO:0051213//GO:0016701//GO:0046872//GO:0043167//GO:0003674//GO:0016702//GO:0003824//GO:0016491//GO:0043169	binding//dioxygenase activity//oxidoreductase activity, acting on single donors with incorporation of molecular oxygen//metal ion binding//ion binding//molecular_function//oxidoreductase activity, acting on single donors with incorporation of molecular oxygen, incorporation of two atoms of oxygen//catalytic activity//oxidoreductase activity//cation binding	no KO assigned | (RefSeq) carotenoid 9,10(9',10')-cleavage dioxygenase 1-like
319	PGSC0003DMG400004437	1.57553	6.53347	6.45788	4.36144	4.83354	226.477	82.9016	1.4499	0.00054606	0.0044615	UP	225.988	219.262	0.043593	0.86149	1	FALSE	238.774	87.0971	1.455	0.00039697	0.0046579	UP	324.791	87.1608	1.8978	1.3891e-08	1.8643e-07	UP	295.469	301.007	-0.02679	0.97847	1	FALSE	306.636	80.6818	1.9262	8.9788e-07	3.2889e-05	UP	GO:0009987//GO:0051220//GO:0051179//GO:0070727//GO:0035437//GO:0033365//GO:0065007//GO:0008150//GO:0045185//GO:0072595//GO:0034613//GO:0070972//GO:0051651//GO:0033036//GO:0065008//GO:0051235//GO:0032507//GO:0051641//GO:0008104//GO:0006621	cellular process//cytoplasmic sequestering of protein//localization//cellular macromolecule localization//maintenance of protein localization in endoplasmic reticulum//protein localization to organelle//biological regulation//biological_process//maintenance of protein location//maintenance of protein localization in organelle//cellular protein localization//protein localization to endoplasmic ret…	GO:0012505//GO:0031224//GO:0043226//GO:0044464//GO:0005622//GO:0044444//GO:0005623//GO:0005783//GO:0016020//GO:0043227//GO:0043231//GO:0005575//GO:0043229//GO:0016021//GO:0044425//GO:0005737//GO:0044424	endomembrane system//intrinsic component of membrane//organelle//cell part//intracellular//cytoplasmic part//cell//endoplasmic reticulum//membrane//membrane-bounded organelle//intracellular membrane-bounded organelle//cellular_component//intracellular organelle//integral component of membrane//membrane part//cytoplasm//intracellular part	GO:0005048//GO:0042277//GO:0033218//GO:0003674//GO:0046923//GO:0005488	signal sequence binding//peptide binding//amide binding//molecular_function//ER retention sequence binding//binding	no KO assigned | (RefSeq) putative ER lumen protein-retaining receptor C28H8.4
320	PGSC0003DMG400004477	0.0903314	7.17063	5.74253	2.49977	3.324	73.9832	2.74036	4.7548	2.2194e-05	0.00029117	UP	88.5106	71.4466	0.30898	0.55909	0.88798	FALSE	93.3502	2.89725	5.0099	1.1996e-09	8.5626e-08	UP	199.979	2.90832	6.1035	1.5912e-11	3.7882e-10	UP	152.302	185.372	-0.28349	0.61307	0.85341	FALSE	157.651	2.66803	5.8848	0.002397	0.022805	UP	--	--	--	--	--	--	no KO assigned | (RefSeq) lachrymatory-factor synthase
321	PGSC0003DMG400004479	0.313993	1.24356	3.06735	3.18783	2.2955	99.2125	10.1039	3.2956	0.00012847	0.0013295	UP	63.6755	95.8372	-0.58985	0.28401	0.63446	FALSE	67.2805	10.6862	2.6544	0.00043499	0.0050136	UP	36.4992	10.6881	1.7719	0.014747	0.041144	UP	83.4136	33.8758	1.3	0.016117	0.069316	FALSE	86.5589	9.87738	3.1315	3.6753e-06	0.00011025	UP	--	--	--	--	--	--	no KO assigned | (RefSeq) lachrymatory-factor synthase-like
322	PGSC0003DMG400004572	0.866378	4.03224	4.89096	7.38739	3.34137	400.946	48.4269	3.0495	3.6082e-14	2.499e-12	UP	163.689	388.483	-1.2469	0.00091453	0.010206	DOWN	172.721	50.9583	1.7611	0.00015323	0.0021734	UP	211.606	50.9374	2.0546	6.1626e-08	7.1691e-07	UP	238.343	195.857	0.28324	0.44892	0.71573	FALSE	247.249	47.2305	2.3882	1.9542e-07	8.6323e-06	UP	GO:0042278//GO:0009063//GO:0006139//GO:1901360//GO:0046130//GO:1901606//GO:0008152//GO:1901565//GO:0044237//GO:0072523//GO:0006575//GO:0046395//GO:0019439//GO:0006520//GO:0042219//GO:0006152//GO:0042454//GO:0034655//GO:0044273//GO:0006730//GO:0055086//GO:0046700//GO:0009164//GO:0006725//GO:0016054//GO:0071704//GO:1901605//GO:1901564//GO:0008150//GO:1901657//GO:0034641//GO:0044270//GO:1901136//GO:…	purine nucleoside metabolic process//cellular amino acid catabolic process//nucleobase-containing compound metabolic process//organic cyclic compound metabolic process//purine ribonucleoside catabolic process//alpha-amino acid catabolic process//metabolic process//organonitrogen compound catabolic process//cellular metabolic process//purine-containing compound catabolic process//cellular modified…	--	--	GO:0051287//GO:0016787//GO:0005488//GO:0016802//GO:0016801//GO:0003674//GO:0048037//GO:0036094//GO:1901265//GO:0003824//GO:0000166//GO:1901363//GO:0004013//GO:0097159//GO:0050662	NAD binding//hydrolase activity//binding//trialkylsulfonium hydrolase activity//hydrolase activity, acting on ether bonds//molecular_function//cofactor binding//small molecule binding//nucleoside phosphate binding//catalytic activity//nucleotide binding//heterocyclic compound binding//adenosylhomocysteinase activity//organic cyclic compound binding//coenzyme binding	K01251 adenosylhomocysteinase [EC:3.3.1.1] | (RefSeq) adenosylhomocysteinase
323	PGSC0003DMG400004653	55.0874	14.7964	21.278	14.6373	25.8209	774.238	3014.5	-1.9611	4.4225e-10	1.6081e-08	DOWN	1245.36	749.8	0.73198	0.019689	0.1118	FALSE	1313.86	3177.74	-1.2742	3.447e-07	1.2542e-05	DOWN	754.288	3178.5	-2.0752	2.086e-17	1.2143e-15	DOWN	997.943	697.706	0.51634	0.033713	0.12163	FALSE	1035.32	2941.07	-1.5063	5.3729e-08	2.7479e-06	DOWN	--	--	--	--	GO:0016740//GO:0016747//GO:0003824//GO:0016407//GO:0016746//GO:0016410//GO:0003674//GO:0008080	transferase activity//transferase activity, transferring acyl groups other than amino-acyl groups//catalytic activity//acetyltransferase activity//transferase activity, transferring acyl groups//N-acyltransferase activity//molecular_function//N-acetyltransferase activity	no KO assigned | (RefSeq) uncharacterized LOC102592015
324	PGSC0003DMG400004695	45.4217	19.7816	24.8064	12.9683	22.7846	1962.02	7140.78	-1.8637	1.6063e-09	5.2511e-08	DOWN	3167.94	1901.27	0.73658	0.015586	0.094237	FALSE	3340.38	7526.48	-1.172	9.3718e-07	2.9947e-05	DOWN	2894.33	7525.97	-1.3786	3.0914e-09	4.7332e-08	DOWN	3354.99	2680.06	0.32405	0.14284	0.34517	FALSE	3478.81	6968.56	-1.0023	0.00015946	0.0026726	DOWN	GO:0016310//GO:0006725//GO:0019222//GO:0071704//GO:0097659//GO:0043170//GO:0034645//GO:0006351//GO:0009059//GO:0019219//GO:1901576//GO:0044260//GO:0006464//GO:2001141//GO:0008152//GO:0051252//GO:0044237//GO:0006793//GO:0044271//GO:1903506//GO:0006139//GO:1901360//GO:1901362//GO:0090304//GO:0080090//GO:0036211//GO:0006468//GO:0044238//GO:0046483//GO:0009987//GO:0051171//GO:0009058//GO:0019538//GO:…	phosphorylation//cellular aromatic compound metabolic process//regulation of metabolic process//organic substance metabolic process//nucleic acid-templated transcription//macromolecule metabolic process//cellular macromolecule biosynthetic process//transcription, DNA-templated//macromolecule biosynthetic process//regulation of nucleobase-containing compound metabolic process//organic substance bi…	--	--	GO:1901265//GO:0043167//GO:0097367//GO:0036094//GO:0003674//GO:0017076//GO:0005524//GO:0043168//GO:0032553//GO:0016301//GO:0032550//GO:0032559//GO:0032549//GO:0005488//GO:0032555//GO:0035639//GO:0097159//GO:0016773//GO:0001883//GO:0030554//GO:0003824//GO:1901363//GO:0000166//GO:0016740//GO:0016772//GO:0001882//GO:0004672	nucleoside phosphate binding//ion binding//carbohydrate derivative binding//small molecule binding//molecular_function//purine nucleotide binding//ATP binding//anion binding//ribonucleotide binding//kinase activity//purine ribonucleoside binding//adenyl ribonucleotide binding//ribonucleoside binding//binding//purine ribonucleotide binding//purine ribonucleoside triphosphate binding//organic cycli…	no KO assigned | (RefSeq) probable serine/threonine-protein kinase DDB_G0272254
325	PGSC0003DMG400004698	2.10353	8.82504	8.52753	11.5099	7.88064	928.611	173.868	2.4171	2.8442e-12	1.5153e-10	UP	572.119	899.033	-0.65206	0.0485	0.2151	FALSE	604.696	183.051	1.724	5.755e-08	2.6835e-06	UP	682.792	183.149	1.8984	1.8729e-11	4.399e-10	UP	603.788	632.342	-0.066664	0.86921	1	FALSE	627.164	169.454	1.8879	1.9691e-05	0.00046819	UP	GO:0006081//GO:0071704//GO:0044237//GO:0008152//GO:0055114//GO:0009987//GO:0008150	cellular aldehyde metabolic process//organic substance metabolic process//cellular metabolic process//metabolic process//oxidation-reduction process//cellular process//biological_process	GO:0043229//GO:0043231//GO:0005575//GO:0043227//GO:0044424//GO:0005737//GO:0005622//GO:0043226//GO:0044464//GO:0012505//GO:0005783//GO:0005623//GO:0044444	intracellular organelle//intracellular membrane-bounded organelle//cellular_component//membrane-bounded organelle//intracellular part//cytoplasm//intracellular//organelle//cell part//endomembrane system//endoplasmic reticulum//cell//cytoplasmic part	GO:0003674//GO:0016903//GO:0004030//GO:0016491//GO:0016620//GO:0003824	molecular_function//oxidoreductase activity, acting on the aldehyde or oxo group of donors//aldehyde dehydrogenase [NAD(P)+] activity//oxidoreductase activity//oxidoreductase activity, acting on the aldehyde or oxo group of donors, NAD or NADP as acceptor//catalytic activity	no KO assigned | (RefSeq) aldehyde dehydrogenase 22A1
326	PGSC0003DMG400004705	2.24674	6.83985	13.886	8.67064	6.32297	218.921	58.2151	1.9109	0.0020353	0.01329	UP	143.38	211.622	-0.56164	0.21443	0.54394	FALSE	151.465	61.4369	1.3018	0.0045966	0.032054	UP	163.654	61.3547	1.4154	0.0028678	0.010155	UP	311.793	151.683	1.0395	0.086298	0.24223	FALSE	323.076	56.9293	2.5046	0.0006949	0.0087168	UP	--	--	GO:0031224//GO:0044425//GO:0016020//GO:0005575//GO:0016021	intrinsic component of membrane//membrane part//membrane//cellular_component//integral component of membrane	--	--	no KO assigned | (RefSeq) uncharacterized LOC102583917
327	PGSC0003DMG400004802	258.791	138.964	85.1847	125.835	116.508	5079.69	10791.9	-1.0871	0.00030963	0.0027926	DOWN	4263.88	4915.28	-0.20511	0.4633	0.81239	FALSE	4499.64	11384.3	-1.3392	3.1039e-06	8.3559e-05	DOWN	5370.72	11382.4	-1.0836	5.7135e-05	0.00033227	DOWN	3070.66	4973.44	-0.69569	0.0010704	0.008063	FALSE	3182.23	10537.8	-1.7275	6.9938e-08	3.493e-06	DOWN	GO:0044248//GO:0009987//GO:0009056//GO:0008150//GO:0006914//GO:0008152//GO:0044237	cellular catabolic process//cellular process//catabolic process//biological_process//autophagy//metabolic process//cellular metabolic process	--	--	--	--	K08341 GABA(A) receptor-associated protein | (RefSeq) autophagy-related protein 8f
328	PGSC0003DMG400004808	45.9953	3.42363	10.5257	5.13655	7.81667	224.458	2102.49	-3.2276	3.293e-06	5.4543e-05	DOWN	306.926	217.309	0.49814	0.1702	0.47741	FALSE	323.924	2221.91	-2.7781	5.199e-05	0.00089058	DOWN	143.483	2221.85	-3.9528	2.7811e-07	2.8083e-06	DOWN	402.236	132.936	1.5973	0.0090756	0.044371	UP	417.856	2054.86	-2.298	0.00050771	0.0067491	DOWN	--	--	--	--	--	--	K13993 HSP20 family protein | (RefSeq) small heat shock protein, chloroplastic-like
329	PGSC0003DMG400004824	1.01298	9.79655	22.7235	12.9654	12.0984	1213.82	97.6975	3.6351	2.3059e-09	7.3681e-08	UP	1021.71	1173.25	-0.19953	0.55654	0.88607	FALSE	1078.65	103.186	3.3859	7.4686e-27	8.5915e-24	UP	870.175	103.174	3.0762	0.0013573	0.0053401	UP	1900.61	806.805	1.2362	0.10192	0.27284	FALSE	1967.76	95.4602	4.3655	2.0617e-05	0.00048788	UP	GO:0008152//GO:0008150//GO:0055114	metabolic process//biological_process//oxidation-reduction process	--	--	GO:0046906//GO:0005488//GO:0005506//GO:0046872//GO:0043167//GO:0003674//GO:0020037//GO:1901363//GO:0003824//GO:0016491//GO:0016705//GO:0043169//GO:0097159//GO:0046914	tetrapyrrole binding//binding//iron ion binding//metal ion binding//ion binding//molecular_function//heme binding//heterocyclic compound binding//catalytic activity//oxidoreductase activity//oxidoreductase activity, acting on paired donors, with incorporation or reduction of molecular oxygen//cation binding//organic cyclic compound binding//transition metal ion binding	no KO assigned | (RefSeq) flavonoid 3'-monooxygenase-like
330	PGSC0003DMG400004924	2.13156	13.3412	5.77177	7.98074	5.33858	457.962	125.325	1.8696	2.8196e-07	6.0673e-06	UP	277.449	443.81	-0.67772	0.056753	0.23884	FALSE	293.027	131.688	1.1539	0.0016195	0.014293	UP	741.041	131.545	2.494	1.6788e-14	6.2069e-13	UP	294.419	685.588	-1.2195	9.3393e-06	0.00015278	DOWN	305.702	122.214	1.3227	0.00037894	0.0053322	UP	--	--	GO:0031224//GO:0016020//GO:0016021//GO:0005575//GO:0044425	intrinsic component of membrane//membrane//integral component of membrane//cellular_component//membrane part	--	--	no KO assigned | (RefSeq) uncharacterized protein At3g49720-like
331	PGSC0003DMG400004928	1.61422	0.209518	0.669708	0.13443	0.377823	16.4284	198.548	-3.5952	5.5133e-13	3.2449e-11	DOWN	41.6979	15.865	1.3941	0.089399	0.3216	FALSE	43.9678	209.065	-2.2494	6.841e-07	2.2831e-05	DOWN	24.2069	209.038	-3.1103	7.4259e-14	2.5138e-12	DOWN	70.5549	22.3404	1.6591	0.0049226	0.027444	UP	73.2751	193.66	-1.4021	0.0013198	0.014367	DOWN	GO:0044237//GO:0008152//GO:0006793//GO:0043170//GO:0007154//GO:0071704//GO:0022414//GO:0044703//GO:0044706//GO:0032501//GO:0009875//GO:0016310//GO:0006464//GO:0044260//GO:0051704//GO:0044267//GO:0009856//GO:0043412//GO:0008150//GO:0009987//GO:0006468//GO:0044238//GO:0036211//GO:0048544//GO:0006796//GO:0008037//GO:0019538	cellular metabolic process//metabolic process//phosphorus metabolic process//macromolecule metabolic process//cell communication//organic substance metabolic process//reproductive process//multi-organism reproductive process//multi-multicellular organism process//multicellular organismal process//pollen-pistil interaction//phosphorylation//cellular protein modification process//cellular macromole…	GO:0044425//GO:0016020//GO:0016021//GO:0005575//GO:0031224	membrane part//membrane//integral component of membrane//cellular_component//intrinsic component of membrane	GO:0016301//GO:0032553//GO:0043168//GO:0005524//GO:0035639//GO:0005488//GO:0032555//GO:0032549//GO:0032559//GO:0032550//GO:0097367//GO:0043167//GO:1901265//GO:0017076//GO:0003674//GO:0036094//GO:0000166//GO:1901363//GO:0003824//GO:0030554//GO:0001883//GO:0004672//GO:0001882//GO:0016772//GO:0016740//GO:0004674//GO:0097159//GO:0016773	kinase activity//ribonucleotide binding//anion binding//ATP binding//purine ribonucleoside triphosphate binding//binding//purine ribonucleotide binding//ribonucleoside binding//adenyl ribonucleotide binding//purine ribonucleoside binding//carbohydrate derivative binding//ion binding//nucleoside phosphate binding//purine nucleotide binding//molecular_function//small molecule binding//nucleotide bi…	no KO assigned | (RefSeq) G-type lectin S-receptor-like serine/threonine-protein kinase At4g27290
332	PGSC0003DMG400004943	0.995021	2.73631	2.87033	6.21056	2.39901	861.263	140.611	2.6147	3.9856e-07	8.3228e-06	UP	296.137	832.525	-1.4912	0.00064117	0.0075871	DOWN	312.579	148.151	1.0772	0.002246	0.018515	UP	360.31	148.105	1.2826	2.2403e-05	0.00014387	UP	348.706	333.573	0.06401	0.88323	1	FALSE	362.02	137.225	1.3995	0.00010059	0.00184	UP	--	--	GO:0044425//GO:0016020//GO:0005575//GO:0016021//GO:0031224	membrane part//membrane//cellular_component//integral component of membrane//intrinsic component of membrane	--	--	no KO assigned | (RefSeq) probable xyloglucan glycosyltransferase 12
333	PGSC0003DMG400005021	2.22816	27.0009	17.741	12.1516	17.5726	789.454	144.246	2.4523	9.7028e-09	2.7758e-07	UP	1029.46	765.057	0.42825	0.22421	0.55736	FALSE	1087.69	150.654	2.852	1.5795e-06	4.7336e-05	UP	1702.04	150.48	3.4996	9.4011e-09	1.3041e-07	UP	1016.79	1573	-0.62949	0.17754	0.39854	FALSE	1056.63	140.181	2.9141	4.8203e-05	0.00099741	UP	GO:0044238//GO:0008150//GO:0005975//GO:0071704//GO:0008152	primary metabolic process//biological_process//carbohydrate metabolic process//organic substance metabolic process//metabolic process	--	--	GO:0003824//GO:0003674//GO:0016787//GO:0016798//GO:0004553	catalytic activity//molecular_function//hydrolase activity//hydrolase activity, acting on glycosyl bonds//hydrolase activity, hydrolyzing O-glycosyl compounds	no KO assigned | (RefSeq) PdB13G_1; glucan endo-1,3-beta-glucosidase 11-like
334	PGSC0003DMG400005036	0.0725057	1.47329	1.94662	2.07363	1.66761	140.232	5.12159	4.7751	6.9927e-15	5.3951e-13	UP	100.828	135.732	-0.42887	0.39612	0.75229	FALSE	106.581	5.4135	4.2992	1.6167e-09	1.1116e-07	UP	95.2525	5.40483	4.1394	1.2173e-11	2.9477e-10	UP	117.195	88.2591	0.40909	0.38823	0.65718	FALSE	121.54	5.01445	4.5992	7.4384e-12	9.2029e-10	UP	--	--	GO:0031224//GO:0016021//GO:0005575//GO:0016020//GO:0044425	intrinsic component of membrane//integral component of membrane//cellular_component//membrane//membrane part	--	--	no KO assigned | (RefSeq) uncharacterized LOC102580825
335	PGSC0003DMG400005092	0.634576	3.27551	9.65962	9.79102	4.21769	1786.49	116.921	3.9335	0.0010675	0.0078303	UP	681.372	1724.56	-1.3397	0.10985	0.36642	FALSE	719.536	123.245	2.5455	3.6574e-15	7.7581e-13	UP	559.896	123.25	2.1836	0.0005536	0.0024526	UP	1554.76	519.572	1.5813	0.021475	0.086555	FALSE	1610.57	114.092	3.8193	1.1245e-05	0.00029055	UP	GO:0044260//GO:0006464//GO:0071704//GO:0043170//GO:0032446//GO:0044237//GO:0008152//GO:0019538//GO:0044238//GO:0009987//GO:0036211//GO:0008150//GO:0044267//GO:0043412//GO:0070647//GO:0016567	cellular macromolecule metabolic process//cellular protein modification process//organic substance metabolic process//macromolecule metabolic process//protein modification by small protein conjugation//cellular metabolic process//metabolic process//protein metabolic process//primary metabolic process//cellular process//protein modification process//biological_process//cellular protein metabolic p…	--	--	GO:0003674//GO:0019787//GO:0004842//GO:0016740//GO:0003824	molecular_function//ubiquitin-like protein transferase activity//ubiquitin-protein transferase activity//transferase activity//catalytic activity	no KO assigned | (RefSeq) putative E3 ubiquitin-protein ligase LIN
336	PGSC0003DMG400005162	0.694308	2.78321	3.57178	2.68812	3.28036	216.804	57.0175	1.9269	8.806e-06	0.00012976	UP	239.17	209.788	0.18911	0.59484	0.9111	FALSE	252.77	60.0052	2.0747	9.5602e-07	3.0451e-05	UP	214.472	60.0252	1.8372	7.9653e-07	7.3122e-06	UP	250.77	198.588	0.33659	0.38411	0.65303	FALSE	260.634	55.5692	2.2297	0.00066176	0.0084193	UP	--	--	--	--	--	--	no KO assigned | (RefSeq) uncharacterized LOC102584690
337	PGSC0003DMG400005189	32.9747	10.3763	11.4299	12.0311	14.9365	1105.3	3144.11	-1.5082	1.2884e-06	2.354e-05	DOWN	1228.03	1070.62	0.19789	0.57042	0.89421	FALSE	1298.22	3315.31	-1.3526	0.0001969	0.0026516	DOWN	918.679	3314.11	-1.851	1.4467e-09	2.3625e-08	DOWN	924.395	850.499	0.1202	0.64062	0.87502	FALSE	960.171	3069.98	-1.6769	5.6372e-07	2.1972e-05	DOWN	GO:0051179//GO:0008150//GO:0006810//GO:0051234	localization//biological_process//transport//establishment of localization	GO:0016021//GO:0005575//GO:0016020//GO:0044425//GO:0031224	integral component of membrane//cellular_component//membrane//membrane part//intrinsic component of membrane	--	--	no KO assigned | (RefSeq) patellin-3-like
338	PGSC0003DMG400005199	203.977	615.241	443.186	496.399	517.934	14893.7	6186.15	1.2676	3.3257e-05	0.00041354	UP	13947.6	14412.1	-0.04726	0.93247	1	FALSE	14728.9	6498.47	1.1805	1.5288e-06	4.6093e-05	UP	17643.3	6498.55	1.4409	5.3407e-10	9.6036e-09	UP	11693.8	16339.5	-0.48261	0.030831	0.11376	FALSE	12135.2	6024.67	1.0102	0.00010307	0.0018819	UP	GO:1901576//GO:0044260//GO:0009059//GO:0043604//GO:0043170//GO:0034645//GO:0071704//GO:0006518//GO:0044271//GO:0043043//GO:0044237//GO:0008152//GO:0043603//GO:0010467//GO:0019538//GO:0009058//GO:0006807//GO:0009987//GO:0044238//GO:0006412//GO:0044249//GO:1901566//GO:0034641//GO:0008150//GO:1901564//GO:0044267	organic substance biosynthetic process//cellular macromolecule metabolic process//macromolecule biosynthetic process//amide biosynthetic process//macromolecule metabolic process//cellular macromolecule biosynthetic process//organic substance metabolic process//peptide metabolic process//cellular nitrogen compound biosynthetic process//peptide biosynthetic process//cellular metabolic process//meta…	GO:0043229//GO:0043231//GO:0005575//GO:0032991//GO:0043227//GO:0043232//GO:0005840//GO:0044424//GO:0005737//GO:0005634//GO:0005622//GO:0043226//GO:0044464//GO:0043228//GO:0044444//GO:0005623	intracellular organelle//intracellular membrane-bounded organelle//cellular_component//protein-containing complex//membrane-bounded organelle//intracellular non-membrane-bounded organelle//ribosome//intracellular part//cytoplasm//nucleus//intracellular//organelle//cell part//non-membrane-bounded organelle//cytoplasmic part//cell	GO:0003674//GO:0046872//GO:0043167//GO:0005488//GO:0003735//GO:0043169//GO:0005198	molecular_function//metal ion binding//ion binding//binding//structural constituent of ribosome//cation binding//structural molecule activity	K02977 small subunit ribosomal protein S27Ae | (RefSeq) ubiquitin-40S ribosomal protein S27a-like
339	PGSC0003DMG400005205	0.16723	4.1222	9.33148	5.5166	3.59922	173.619	5.45955	4.991	4.2885e-07	8.8569e-06	UP	101.095	167.7	-0.73017	0.17306	0.48186	FALSE	106.773	5.7785	4.2077	2.9567e-09	1.8896e-07	UP	122.704	5.77199	4.41	0.01305	0.037125	UP	264.234	113.763	1.2158	0.33988	0.60545	FALSE	273.312	5.34686	5.6757	0.0027158	0.024985	UP	--	--	--	--	--	--	--
340	PGSC0003DMG400005226	0.128813	1.14126	2.71026	3.92371	1.60183	475.192	15.7867	4.9117	3.0816e-06	5.1471e-05	UP	173.008	458.922	-1.4074	0.038708	0.18324	FALSE	182.721	16.6276	3.458	7.7873e-11	7.3013e-09	UP	130.383	16.5891	2.9744	0.0019223	0.0072186	UP	293.852	120.855	1.2818	0.26001	0.51162	FALSE	304.155	15.4362	4.3004	0.0066644	0.048986	UP	--	--	GO:0031224//GO:0016020//GO:0005575//GO:0016021//GO:0044425	intrinsic component of membrane//membrane//cellular_component//integral component of membrane//membrane part	--	--	no KO assigned | (RefSeq) receptor-like protein 12
341	PGSC0003DMG400005284	1.37753	19.7683	54.8458	20.0634	28.9156	1232.14	86.4871	3.8325	0.00026956	0.0024854	UP	1542.27	1189.64	0.37453	0.55205	0.88286	FALSE	1631.99	91.3541	4.159	0.00056673	0.0062021	UP	1141.6	91.4768	3.6415	3.7551e-05	0.0002284	UP	2947.5	1059.35	1.4763	0.00010469	0.0011695	UP	3053.98	84.3805	5.1776	2.8686e-29	4.2766e-26	UP	GO:0008150//GO:0055114//GO:0008152	biological_process//oxidation-reduction process//metabolic process	--	--	GO:0016491//GO:0003855//GO:0003824//GO:0016836//GO:0016829//GO:0003674//GO:0016616//GO:0004764//GO:0016835//GO:0016614	oxidoreductase activity//3-dehydroquinate dehydratase activity//catalytic activity//hydro-lyase activity//lyase activity//molecular_function//oxidoreductase activity, acting on the CH-OH group of donors, NAD or NADP as acceptor//shikimate 3-dehydrogenase (NADP+) activity//carbon-oxygen lyase activity//oxidoreductase activity, acting on CH-OH group of donors	K13832 3-dehydroquinate dehydratase / shikimate dehydrogenase [EC:4.2.1.10 1.1.1.25] | (RefSeq) bifunctional 3-dehydroquinate dehydratase/shikimate dehydrogenase, chloroplastic-like
342	PGSC0003DMG400005335	22.5829	104.935	110.54	88.7454	223.363	3152.27	800.579	1.9773	8.0495e-10	2.7907e-08	UP	7224.6	3049.4	1.2444	0.004264	0.035403	UP	7609.27	838.918	3.1812	4.8109e-08	2.3133e-06	UP	3560.75	838.71	2.0859	0.0037701	0.012871	UP	3480.31	3293.34	0.079664	0.89737	1	FALSE	3607.86	778.774	2.2119	7.3576e-15	1.5783e-12	UP	GO:0042592//GO:0008152//GO:0065008//GO:0050789//GO:0065007//GO:0008150//GO:0050794//GO:0055114//GO:0019725//GO:0045454//GO:0009987	homeostatic process//metabolic process//regulation of biological quality//regulation of biological process//biological regulation//biological_process//regulation of cellular process//oxidation-reduction process//cellular homeostasis//cell redox homeostasis//cellular process	GO:0044425//GO:0016021//GO:0005575//GO:0016020//GO:0005623//GO:0031224	membrane part//integral component of membrane//cellular_component//membrane//cell//intrinsic component of membrane	GO:0009055//GO:0016667//GO:0003674//GO:0015036//GO:0015035//GO:0016491//GO:0003824	electron transfer activity//oxidoreductase activity, acting on a sulfur group of donors//molecular_function//disulfide oxidoreductase activity//protein disulfide oxidoreductase activity//oxidoreductase activity//catalytic activity	K03676 glutaredoxin 3 | (RefSeq) GRX1; glutaredoxin
343	PGSC0003DMG400005404	12.3714	68.6579	186.188	60.4379	91.0794	2326.92	475.625	2.2905	0.0019246	0.012689	UP	3133.63	2248.33	0.47898	0.16314	0.4647	FALSE	3311.27	499.468	2.7289	1.7147e-24	1.4246e-21	UP	2492.39	499.244	2.3197	2.583e-05	0.00016368	UP	6337.98	2312.37	1.4547	0.013449	0.060264	FALSE	6570.74	463.344	3.8259	5.4097e-07	2.1168e-05	UP	GO:0008152//GO:0055114//GO:0008150	metabolic process//oxidation-reduction process//biological_process	--	--	GO:0003674//GO:0016655//GO:0003955//GO:0016491//GO:0003824//GO:0016651	molecular_function//oxidoreductase activity, acting on NAD(P)H, quinone or similar compound as acceptor//NAD(P)H dehydrogenase (quinone) activity//oxidoreductase activity//catalytic activity//oxidoreductase activity, acting on NAD(P)H	no KO assigned | (RefSeq) NAD(P)H:QR; NAD(P)H:quinone oxidoreductase-like
344	PGSC0003DMG400005410	7.90272	109.034	169.561	77.2324	58.3731	3216.44	329.878	3.2855	8.1421e-05	0.00090238	UP	2170.77	3106.94	-0.51729	0.3124	0.66725	FALSE	2293.26	346.786	2.7253	4.8915e-23	3.1804e-20	UP	4275.21	346.844	3.6236	4.0693e-08	4.929e-07	UP	6276.75	3967.33	0.66185	0.41124	0.68067	FALSE	6504.47	321.351	4.3392	0.00020267	0.0032438	UP	GO:0008150//GO:0055114//GO:0008152	biological_process//oxidation-reduction process//metabolic process	--	--	GO:0003824//GO:0016491//GO:0003674	catalytic activity//oxidoreductase activity//molecular_function	no KO assigned | (RefSeq) NAD(P)H:quinone oxidoreductase-like
345	PGSC0003DMG400005597	46.7867	14.2677	19.6504	16.0748	25.4923	1386.66	4172.84	-1.5894	2.5396e-07	5.5327e-06	DOWN	2009.89	1342.66	0.58202	0.057445	0.24023	FALSE	2121	4398.89	-1.0524	1.5696e-05	0.00033225	DOWN	1183.66	4398.38	-1.8937	2.9426e-15	1.2552e-13	DOWN	1511.51	1095.87	0.46391	0.051661	0.16667	FALSE	1566.52	4072.77	-1.3784	3.4395e-07	1.4241e-05	DOWN	--	--	--	--	--	--	no KO assigned | (RefSeq) serine/arginine repetitive matrix protein 2-like
346	PGSC0003DMG400005629	0.22873	1.39374	1.35456	14.26	1.86194	702.159	11.37	5.9485	5.3392e-27	1.4723e-24	UP	82.8928	679.417	-3.035	7.8539e-13	6.6123e-11	DOWN	87.6689	11.9407	2.8762	3.4895e-05	0.00063794	UP	65.2145	11.9265	2.451	0.0068866	0.02148	UP	58.4598	60.5836	-0.051482	0.9913	1	FALSE	60.6201	11.0855	2.4511	0.00084994	0.010306	UP	--	--	GO:0031224//GO:0044425//GO:0016020//GO:0005575//GO:0016021	intrinsic component of membrane//membrane part//membrane//cellular_component//integral component of membrane	--	--	no KO assigned | (RefSeq) altered inheritance of mitochondria protein 3
347	PGSC0003DMG400005835	0.957916	6.34169	12.8182	12.0628	8.47672	801.188	64.4614	3.6356	0.00012749	0.0013224	UP	496.147	773.759	-0.64112	0.32005	0.67554	FALSE	524.588	67.9192	2.9493	1.7907e-07	7.1122e-06	UP	398.532	67.9453	2.5522	1.3588e-14	5.113e-13	UP	753.452	368.891	1.0303	0.040089	0.13891	FALSE	780.575	62.8638	3.6342	3.8195e-07	1.5579e-05	UP	GO:2001141//GO:0044260//GO:1901576//GO:0019219//GO:0009059//GO:0034645//GO:0006351//GO:0043170//GO:0097659//GO:0071704//GO:0019222//GO:0006725//GO:1901360//GO:0006139//GO:1903506//GO:0044271//GO:0044237//GO:0051252//GO:0008152//GO:0010467//GO:0006807//GO:0009058//GO:0009987//GO:0051171//GO:0044238//GO:0046483//GO:0080090//GO:0090304//GO:1901362//GO:0034641//GO:0009889//GO:0016070//GO:0044249//GO:…	regulation of RNA biosynthetic process//cellular macromolecule metabolic process//organic substance biosynthetic process//regulation of nucleobase-containing compound metabolic process//macromolecule biosynthetic process//cellular macromolecule biosynthetic process//transcription, DNA-templated//macromolecule metabolic process//nucleic acid-templated transcription//organic substance metabolic pro…	--	--	GO:0003674//GO:0003700//GO:0005488//GO:0097159//GO:0043565//GO:0003676//GO:0003677//GO:1901363	molecular_function//DNA-binding transcription factor activity//binding//organic cyclic compound binding//sequence-specific DNA binding//nucleic acid binding//DNA binding//heterocyclic compound binding	no KO assigned | (RefSeq) probable WRKY transcription factor 53
348	PGSC0003DMG400005837	73.6512	1.59248	3.28511	0.871932	3.15521	38.0253	3352.43	-6.4621	2.955e-60	1.4667e-56	DOWN	131.686	36.8707	1.8366	0.28553	0.63607	FALSE	139.079	3534.23	-4.6674	5.3625e-58	1.6039e-53	DOWN	67.4636	3534.87	-5.7114	1.1879e-83	3.5267e-80	DOWN	130.504	62.4714	1.0628	0.11864	0.30416	FALSE	135.26	3271.1	-4.596	1.2356e-48	1.2281e-44	DOWN	GO:0018130//GO:0050794//GO:0019438//GO:0034654//GO:0060255//GO:0010556//GO:0044249//GO:0031323//GO:0050789//GO:0034641//GO:0009889//GO:0016070//GO:0065007//GO:0032774//GO:2000112//GO:0010468//GO:0006355//GO:0008150//GO:0031326//GO:0009987//GO:0051171//GO:0044238//GO:0046483//GO:1901362//GO:0080090//GO:0090304//GO:0010467//GO:0009058//GO:0006807//GO:0044237//GO:0008152//GO:0051252//GO:0044271//GO:…	heterocycle biosynthetic process//regulation of cellular process//aromatic compound biosynthetic process//nucleobase-containing compound biosynthetic process//regulation of macromolecule metabolic process//regulation of macromolecule biosynthetic process//cellular biosynthetic process//regulation of cellular metabolic process//regulation of biological process//cellular nitrogen compound metabolic…	GO:0005623//GO:0043226//GO:0044464//GO:0005634//GO:0005622//GO:0044424//GO:0043227//GO:0043229//GO:0043231//GO:0005575	cell//organelle//cell part//nucleus//intracellular//intracellular part//membrane-bounded organelle//intracellular organelle//intracellular membrane-bounded organelle//cellular_component	GO:1901363//GO:0003676//GO:0003677//GO:0097159//GO:0005488//GO:0003700//GO:0003674	heterocyclic compound binding//nucleic acid binding//DNA binding//organic cyclic compound binding//binding//DNA-binding transcription factor activity//molecular_function	no KO assigned | (RefSeq) ethylene-responsive transcription factor ERF061-like
349	PGSC0003DMG400005847	1.95024	4.39571	6.40698	4.387	6.23207	438.108	199.086	1.1379	0.0013676	0.0095906	UP	556.69	424.141	0.39233	0.20983	0.53738	FALSE	588.523	209.464	1.4904	0.00082393	0.0083649	UP	420.606	209.416	1.0061	0.0028247	0.01003	UP	561.533	389.928	0.52617	0.17609	0.39669	FALSE	583.409	194.115	1.5876	0.00062786	0.0080693	UP	--	--	--	--	--	--	no KO assigned | (RefSeq) nephrocystin-3-like
350	PGSC0003DMG400005904	0.0252265	3.3703	1.96787	3.29804	1.45514	239.703	1.9474	6.9436	1.7925e-28	5.679e-26	UP	92.7733	232.079	-1.3228	0.012815	0.081342	FALSE	98.0364	2.06491	5.5692	0.002026	0.017069	UP	235.39	2.06262	6.8344	1.0078e-20	8.9316e-19	UP	125.718	217.646	-0.79179	0.045385	0.15178	FALSE	130.624	1.9092	6.0963	2.9162e-13	4.885e-11	UP	--	--	--	--	--	--	no KO assigned | (RefSeq) protein FAF-like, chloroplastic
351	PGSC0003DMG400005928	0	0.429604	3.40564	0.329133	1.76591	19.3156	0	Inf	0.0020267	0.013245	UP	88.1108	18.6255	2.242	0.15357	0.44975	FALSE	93.5157	0	Inf	0.0015665	0.013948	UP	23.5822	0	Inf	0.0013169	0.0052012	UP	171.677	21.8568	2.9735	2.848e-08	9.589e-07	UP	178.012	0	Inf	1.7458e-23	1.6174e-20	UP	GO:0019538//GO:0036211//GO:0009987//GO:0044238//GO:0008150//GO:0016567//GO:0043412//GO:0070647//GO:0044267//GO:0006464//GO:0044260//GO:0043170//GO:0071704//GO:0032446//GO:0044237//GO:0008152	protein metabolic process//protein modification process//cellular process//primary metabolic process//biological_process//protein ubiquitination//macromolecule modification//protein modification by small protein conjugation or removal//cellular protein metabolic process//cellular protein modification process//cellular macromolecule metabolic process//macromolecule metabolic process//organic subst…	--	--	GO:0004842//GO:0016740//GO:0003824//GO:0003674//GO:0019787	ubiquitin-protein transferase activity//transferase activity//catalytic activity//molecular_function//ubiquitin-like protein transferase activity	no KO assigned | (RefSeq) E3 ubiquitin-protein ligase PUB24-like
352	PGSC0003DMG400006041	73.5666	6.64577	10.8586	7.40158	14.2079	340.918	3470.45	-3.3476	5.6616e-24	1.1709e-21	DOWN	595.452	329.975	0.85163	0.01281	0.081329	FALSE	628.514	3652.72	-2.539	1.9872e-22	1.213e-19	DOWN	293.831	3652.97	-3.636	5.6992e-44	3.0214e-41	DOWN	442.573	271.896	0.70286	0.015998	0.06895	FALSE	458.927	3383.48	-2.8822	2.8437e-23	2.4938e-20	DOWN	--	--	GO:0044425//GO:0016021//GO:0005575//GO:0016020//GO:0031224	membrane part//integral component of membrane//cellular_component//membrane//intrinsic component of membrane	--	--	K19040 E3 ubiquitin-protein ligase ATL10/75/76/77/78 [EC:2.3.2.27] | (RefSeq) RING-H2 finger protein ATL78-like
353	PGSC0003DMG400006111	54.7081	29.5265	20.6989	21.2392	28.3742	958.61	2571.17	-1.4234	7.7614e-06	0.00011623	DOWN	1165.52	928.702	0.32768	0.29745	0.65057	FALSE	1230.09	2711.75	-1.1405	0.00014967	0.0021327	DOWN	1287.83	2710.73	-1.0737	0.00019412	0.00098194	DOWN	840.754	1192.33	-0.50403	0.030254	0.11232	FALSE	871.262	2510.9	-1.527	4.1689e-06	0.00012259	DOWN	GO:0006629//GO:0008150//GO:0090407//GO:0044249//GO:0046474//GO:0046486//GO:0008610//GO:0009058//GO:0019637//GO:0006796//GO:0009987//GO:0044238//GO:0006793//GO:0046341//GO:0008152//GO:0008654//GO:0044237//GO:0006644//GO:0045017//GO:1901576//GO:0044255//GO:0006650//GO:0016024//GO:0071704	lipid metabolic process//biological_process//organophosphate biosynthetic process//cellular biosynthetic process//glycerophospholipid biosynthetic process//glycerolipid metabolic process//lipid biosynthetic process//biosynthetic process//organophosphate metabolic process//phosphate-containing compound metabolic process//cellular process//primary metabolic process//phosphorus metabolic process//CD…	GO:0031224//GO:0044425//GO:0005575//GO:0016021//GO:0016020	intrinsic component of membrane//membrane part//cellular_component//integral component of membrane//membrane	GO:0016772//GO:0016740//GO:0003824//GO:0004605//GO:0003674//GO:0016779//GO:0070567	transferase activity, transferring phosphorus-containing groups//transferase activity//catalytic activity//phosphatidate cytidylyltransferase activity//molecular_function//nucleotidyltransferase activity//cytidylyltransferase activity	K00981 phosphatidate cytidylyltransferase [EC:2.7.7.41] | (RefSeq) CDS1, cds; phosphatidate cytidylyltransferase-like
354	PGSC0003DMG400006157	2.28592	11.9163	8.79312	6.64279	9.552	294.753	103.753	1.5063	0.00026231	0.0024297	UP	380.973	285.261	0.41741	0.21191	0.54027	FALSE	402.39	109.261	1.8808	1.2314e-07	5.1874e-06	UP	505.468	109.219	2.2104	3.316e-13	1.0363e-11	UP	342.639	467.974	-0.44974	0.12272	0.31147	FALSE	355.643	101.232	1.8128	7.8975e-07	2.962e-05	UP	GO:0019692//GO:1901293//GO:0044281//GO:1901362//GO:0044238//GO:0009189//GO:0046483//GO:0007275//GO:0009987//GO:0009196//GO:0006807//GO:0019637//GO:0009058//GO:0046385//GO:0032502//GO:0006796//GO:0046072//GO:0019438//GO:0009186//GO:0034654//GO:0048608//GO:0009793//GO:0009197//GO:0048316//GO:0003006//GO:0072527//GO:1901135//GO:0018130//GO:1901564//GO:0008150//GO:0006233//GO:0009791//GO:0009165//GO:…	deoxyribose phosphate metabolic process//nucleoside phosphate biosynthetic process//small molecule metabolic process//organic cyclic compound biosynthetic process//primary metabolic process//deoxyribonucleoside diphosphate biosynthetic process//heterocycle metabolic process//multicellular organism development//cellular process//pyrimidine deoxyribonucleoside diphosphate metabolic process//nitroge…	GO:0044464//GO:0043226//GO:0005622//GO:0005829//GO:0005634//GO:0031974//GO:0005623//GO:0044444//GO:0044428//GO:0043227//GO:0005739//GO:0005575//GO:0043231//GO:0044422//GO:0070013//GO:0044446//GO:0043229//GO:0005654//GO:0005737//GO:0031981//GO:0044424//GO:0043233	cell part//organelle//intracellular//cytosol//nucleus//membrane-enclosed lumen//cell//cytoplasmic part//nuclear part//membrane-bounded organelle//mitochondrion//cellular_component//intracellular membrane-bounded organelle//organelle part//intracellular organelle lumen//intracellular organelle part//intracellular organelle//nucleoplasm//cytoplasm//nuclear lumen//intracellular part//organelle lumen	GO:0097159//GO:0019205//GO:0030554//GO:0003824//GO:0001883//GO:0000166//GO:1901363//GO:0001882//GO:0016740//GO:0004798//GO:0016772//GO:1901265//GO:0043167//GO:0097367//GO:0003674//GO:0036094//GO:0017076//GO:0032553//GO:0005524//GO:0016776//GO:0043168//GO:0016301//GO:0032559//GO:0032549//GO:0032550//GO:0035639//GO:0032555//GO:0005488	organic cyclic compound binding//nucleobase-containing compound kinase activity//adenyl nucleotide binding//catalytic activity//purine nucleoside binding//nucleotide binding//heterocyclic compound binding//nucleoside binding//transferase activity//thymidylate kinase activity//transferase activity, transferring phosphorus-containing groups//nucleoside phosphate binding//ion binding//carbohydrate d…	K00943 dTMP kinase [EC:2.7.4.9] | (RefSeq) thymidylate kinase
355	PGSC0003DMG400006221	27.8989	8.31023	8.6467	12.8359	11.7792	646.799	1438.24	-1.1529	0.00023041	0.002179	DOWN	535.738	625.429	-0.22332	0.49233	0.83725	FALSE	564.972	1515.97	-1.424	1.178e-07	4.9836e-06	DOWN	398.098	1515.75	-1.9288	6.0689e-14	2.0805e-12	DOWN	384.858	368.915	0.061041	0.85861	1	FALSE	398.861	1403.69	-1.8153	7.1543e-10	5.7194e-08	DOWN	--	--	--	--	--	--	no KO assigned | (RefSeq) uncharacterized LOC102601073
356	PGSC0003DMG400006230	18.2541	0.41993	2.16472	0.0439041	1.02649	1.02704	444.062	-8.7561	4.4377e-19	5.4838e-17	DOWN	21.7132	0.997597	4.444	0.0080366	0.057402	FALSE	22.996	466.136	-4.3413	1.7268e-10	1.497e-08	DOWN	9.61089	466.073	-5.5997	4.8631e-14	1.6985e-12	DOWN	44.5767	8.92845	2.3198	0.22032	0.45933	FALSE	46.4846	432.351	-3.2174	1.0424e-06	3.6913e-05	DOWN	--	--	--	--	--	--	--
357	PGSC0003DMG400006231	60.3572	5.78246	11.6487	3.89492	12.1068	100.426	1575	-3.9711	7.483e-29	2.4489e-26	DOWN	279.431	97.1125	1.5248	0.00080782	0.0091969	UP	295.749	1656.32	-2.4855	2.0367e-18	7.0019e-16	DOWN	142.296	1656.71	-3.5414	1.7335e-29	3.4773e-27	DOWN	260.56	131.509	0.98646	0.073062	0.21444	FALSE	270.759	1534.5	-2.5027	1.8225e-16	4.8519e-14	DOWN	--	--	--	--	--	--	--
358	PGSC0003DMG400006311	79.82	18.0988	38.5915	29.9928	39.427	1582.85	4333.76	-1.4531	2.0542e-06	3.5443e-05	DOWN	1890.7	1530.69	0.30474	0.33433	0.69173	FALSE	1993.56	4571.49	-1.1973	1.3085e-05	0.00028734	DOWN	909.701	4571.35	-2.3292	1.5337e-13	5.0534e-12	DOWN	1820.49	843.167	1.1104	0.039979	0.13866	FALSE	1886.1	4231.04	-1.1656	0.00029038	0.0042884	DOWN	GO:1903506//GO:1901360//GO:0006139//GO:0044271//GO:0051252//GO:0008152//GO:0044237//GO:0019219//GO:0009059//GO:0044260//GO:1901576//GO:2001141//GO:0019222//GO:0006725//GO:0097659//GO:0071704//GO:0034645//GO:0006351//GO:0043170//GO:0008150//GO:0031326//GO:0006355//GO:0032774//GO:2000112//GO:0010468//GO:0065007//GO:0016070//GO:0034641//GO:0009889//GO:0050789//GO:0044249//GO:0031323//GO:0060255//GO:…	regulation of nucleic acid-templated transcription//organic cyclic compound metabolic process//nucleobase-containing compound metabolic process//cellular nitrogen compound biosynthetic process//regulation of RNA metabolic process//metabolic process//cellular metabolic process//regulation of nucleobase-containing compound metabolic process//macromolecule biosynthetic process//cellular macromolecul…	GO:0044424//GO:0005575//GO:0043231//GO:0043229//GO:0043227//GO:0005623//GO:0005622//GO:0005634//GO:0044464//GO:0043226	intracellular part//cellular_component//intracellular membrane-bounded organelle//intracellular organelle//membrane-bounded organelle//cell//intracellular//nucleus//cell part//organelle	GO:0005488//GO:0003674//GO:0003700//GO:0043565//GO:0003677//GO:0003676//GO:1901363//GO:0097159	binding//molecular_function//DNA-binding transcription factor activity//sequence-specific DNA binding//DNA binding//nucleic acid binding//heterocyclic compound binding//organic cyclic compound binding	K09338 homeobox-leucine zipper protein | (RefSeq) homeobox-leucine zipper protein HOX11-like
359	PGSC0003DMG400006313	1.23672	6.28155	4.17851	8.13344	4.47251	437.003	69.6972	2.6485	0.0013892	0.0097234	UP	219.752	424.114	-0.94858	0.1271	0.4014	FALSE	232.061	73.4672	1.6593	5.4114e-05	0.00092012	UP	328.779	73.4454	2.1624	7.0584e-07	6.5546e-06	UP	202.499	304.545	-0.58875	0.06641	0.2003	FALSE	210.156	68.0357	1.6271	0.00014062	0.0024153	UP	--	--	--	--	--	--	no KO assigned | (RefSeq) uncharacterized LOC102595892
360	PGSC0003DMG400006406	108.817	39.0527	27.186	32.5288	32.9635	2207.6	7647.29	-1.7925	5.1058e-09	1.5354e-07	DOWN	2028.76	2137.59	-0.075387	0.79068	1	FALSE	2141.15	8063.71	-1.9131	9.8366e-15	1.9878e-12	DOWN	2549.33	8065.89	-1.6617	1.3597e-12	3.8741e-11	DOWN	1642.74	2360.57	-0.52302	0.021547	0.086763	FALSE	1703.42	7462	-2.1311	4.0718e-15	9.3392e-13	DOWN	--	--	GO:0031224//GO:0016021//GO:0005575//GO:0016020//GO:0044425	intrinsic component of membrane//integral component of membrane//cellular_component//membrane//membrane part	--	--	no KO assigned | (RefSeq) uncharacterized LOC102579190
361	PGSC0003DMG400006604	4.50157	19.9239	17.1166	16.9013	16.6473	939.154	252.654	1.8942	0.0035202	0.020649	UP	837.679	908.065	-0.1164	0.80725	1	FALSE	884.31	265.781	1.7343	5.9485e-07	2.0103e-05	UP	1050.92	265.9	1.9827	1.181e-10	2.3899e-09	UP	826.133	973.522	-0.23684	0.54587	0.80301	FALSE	857.465	246.146	1.8006	2.5123e-05	0.00058476	UP	GO:2001141//GO:1901576//GO:0044260//GO:0009059//GO:0019219//GO:0043170//GO:0034645//GO:0006351//GO:0071704//GO:0097659//GO:0006725//GO:0019222//GO:0032501//GO:0044271//GO:0006139//GO:1901360//GO:1903506//GO:0044237//GO:0008152//GO:0051252//GO:0010467//GO:0032502//GO:0009058//GO:0006807//GO:0009987//GO:0051171//GO:0007275//GO:0044238//GO:0046483//GO:1901362//GO:0090304//GO:0080090//GO:0044249//GO:…	regulation of RNA biosynthetic process//organic substance biosynthetic process//cellular macromolecule metabolic process//macromolecule biosynthetic process//regulation of nucleobase-containing compound metabolic process//macromolecule metabolic process//cellular macromolecule biosynthetic process//transcription, DNA-templated//organic substance metabolic process//nucleic acid-templated transcrip…	GO:0043229//GO:0043231//GO:0005575//GO:0043227//GO:0044424//GO:0005634//GO:0005622//GO:0043226//GO:0044464//GO:0005623	intracellular organelle//intracellular membrane-bounded organelle//cellular_component//membrane-bounded organelle//intracellular part//nucleus//intracellular//organelle//cell part//cell	GO:0003674//GO:0003700//GO:0005488//GO:0097159//GO:1901363//GO:0003676//GO:0003677	molecular_function//DNA-binding transcription factor activity//binding//organic cyclic compound binding//heterocyclic compound binding//nucleic acid binding//DNA binding	K09284 AP2-like factor, euAP2 lineage | (RefSeq) ethylene-responsive transcription factor RAP2-7-like
362	PGSC0003DMG400006636	4.10925	24.6554	11.8602	12.3787	12.7929	1018.91	345.942	1.5584	2.1247e-06	3.6555e-05	UP	951.62	986.993	-0.052654	0.8888	1	FALSE	1004.87	363.647	1.4664	7.3554e-07	2.4308e-05	UP	1960.97	363.739	2.4306	2.8112e-08	3.5304e-07	UP	864.383	1813.32	-1.0689	0.0019576	0.013118	DOWN	897.355	336.955	1.4131	3.066e-06	9.3571e-05	UP	GO:0009987//GO:0051179//GO:0006810//GO:0051234//GO:0008150//GO:0055085	cellular process//localization//transport//establishment of localization//biological_process//transmembrane transport	GO:0031224//GO:0016020//GO:0016021//GO:0005575//GO:0044425	intrinsic component of membrane//membrane//integral component of membrane//cellular_component//membrane part	GO:0005215//GO:0022857//GO:0003674	transporter activity//transmembrane transporter activity//molecular_function	K08145 MFS transporter, SP family, solute carrier family 2 (facilitated glucose transporter), member 8 | (RefSeq) sugar transporter ERD6-like 5
363	PGSC0003DMG400006700	13.6878	296.28	43.2265	76.8488	39.1493	2837.15	520.939	2.4453	2.237e-14	1.617e-12	UP	1301.51	2747.16	-1.0778	0.00039334	0.0050673	DOWN	1375.59	548.966	1.3253	2.2042e-06	6.2802e-05	UP	10502.4	549.122	4.2575	1.0593e-13	3.5336e-12	UP	1427.7	9732.96	-2.7692	2.4144e-08	8.3285e-07	DOWN	1480.46	508.127	1.5428	5.6056e-05	0.0011362	UP	--	--	--	--	--	--	no KO assigned | (RefSeq) uncharacterized LOC102578669
364	PGSC0003DMG400006735	121.922	55.7783	30.6555	50.6384	35.6391	3391.43	8389.13	-1.3066	0.0002257	0.0021413	DOWN	2166.23	3278.13	-0.59769	0.15244	0.44787	FALSE	2284.53	8851.91	-1.9541	6.6024e-08	3.0148e-06	DOWN	3549.6	8850.92	-1.3182	9.4614e-05	0.00051777	DOWN	1827.19	3289.96	-0.84844	0.016134	0.069368	FALSE	1892.76	8192.4	-2.1138	1.6085e-08	9.2408e-07	DOWN	--	--	GO:0016021//GO:0043229//GO:0005575//GO:0043231//GO:0043227//GO:0016020//GO:0044424//GO:0005737//GO:0044425//GO:0009507//GO:0005622//GO:0044464//GO:0043226//GO:0031224//GO:0009536//GO:0005623//GO:0044444	integral component of membrane//intracellular organelle//cellular_component//intracellular membrane-bounded organelle//membrane-bounded organelle//membrane//intracellular part//cytoplasm//membrane part//chloroplast//intracellular//cell part//organelle//intrinsic component of membrane//plastid//cell//cytoplasmic part	--	--	no KO assigned | (RefSeq) uncharacterized LOC102586830
365	PGSC0003DMG400006764	36.5334	3.0523	2.87593	11.157	2.58995	1011.07	3390.67	-1.7457	0.00018441	0.0018167	DOWN	207.202	976.766	-2.237	0.0035524	0.030708	DOWN	218.944	3580.6	-4.0316	1.6828e-11	1.7966e-09	DOWN	261.44	3581.03	-3.7758	7.1841e-11	1.502e-09	DOWN	228.795	242.02	-0.08107	0.73761	0.93634	FALSE	237.5	3311.91	-3.8017	3.4468e-11	3.8348e-09	DOWN	GO:0071704//GO:0034754//GO:0009690//GO:0006725//GO:0065008//GO:0044237//GO:0008152//GO:0010817//GO:0042445//GO:0046483//GO:0009987//GO:0055114//GO:0006807//GO:0009308//GO:1901564//GO:0008150//GO:0065007	organic substance metabolic process//cellular hormone metabolic process//cytokinin metabolic process//cellular aromatic compound metabolic process//regulation of biological quality//cellular metabolic process//metabolic process//regulation of hormone levels//hormone metabolic process//heterocycle metabolic process//cellular process//oxidation-reduction process//nitrogen compound metabolic process…	GO:0016020//GO:0016021//GO:0005575//GO:0044425//GO:0031224	membrane//integral component of membrane//cellular_component//membrane part//intrinsic component of membrane	GO:1901265//GO:0043167//GO:0016614//GO:0003674//GO:0048037//GO:0036094//GO:0043168//GO:0005488//GO:0050660//GO:0050662//GO:0097159//GO:0000166//GO:1901363//GO:0016645//GO:0003824//GO:0016491//GO:0019139	nucleoside phosphate binding//ion binding//oxidoreductase activity, acting on CH-OH group of donors//molecular_function//cofactor binding//small molecule binding//anion binding//binding//flavin adenine dinucleotide binding//coenzyme binding//organic cyclic compound binding//nucleotide binding//heterocyclic compound binding//oxidoreductase activity, acting on the CH-NH group of donors//catalytic a…	K00279 cytokinin dehydrogenase [EC:1.5.99.12] | (RefSeq) CKX3; cytokinin oxidase/dehydrogenase
366	PGSC0003DMG400006790	5.4129	51.79	21.8751	32.903	21.0489	865.592	144.98	2.5778	6.3644e-07	1.2534e-05	UP	487.998	836.944	-0.77825	0.12342	0.39404	FALSE	516.059	152.699	1.7568	0.0066432	0.042212	UP	1294.32	152.617	3.0842	4.205e-29	8.213e-27	UP	510.731	1198.97	-1.2312	4.849e-07	1.1821e-05	DOWN	529.203	141.494	1.9031	1.3231e-05	0.00033519	UP	--	--	--	--	--	--	no KO assigned | (RefSeq) uncharacterized LOC102605760
367	PGSC0003DMG400006854	1.8983	6.77627	7.30529	13.1555	6.74864	815.952	120.12	2.764	5.6009e-13	3.29e-11	UP	376.262	789.52	-1.0692	0.0013703	0.014154	DOWN	397.051	126.439	1.6509	2.5962e-06	7.173e-05	UP	400.413	126.361	1.6639	1.0922e-06	9.7201e-06	UP	405.447	371.237	0.12717	0.89829	1	FALSE	420.113	117.199	1.8418	0.0022592	0.021758	UP	GO:0071704//GO:0044106//GO:1901565//GO:0008152//GO:0044237//GO:0006598//GO:0009987//GO:0009056//GO:0006807//GO:0055114//GO:1901575//GO:0006595//GO:0006576//GO:0009310//GO:0042402//GO:1901564//GO:0008150//GO:0009308//GO:0034641	organic substance metabolic process//cellular amine metabolic process//organonitrogen compound catabolic process//metabolic process//cellular metabolic process//polyamine catabolic process//cellular process//catabolic process//nitrogen compound metabolic process//oxidation-reduction process//organic substance catabolic process//polyamine metabolic process//cellular biogenic amine metabolic proces…	--	--	GO:0043167//GO:1901265//GO:0036094//GO:0048037//GO:0003674//GO:0043168//GO:0016647//GO:0005488//GO:0097159//GO:0050662//GO:0050660//GO:0003824//GO:1901363//GO:0016645//GO:0000166//GO:0046592//GO:0016491	ion binding//nucleoside phosphate binding//small molecule binding//cofactor binding//molecular_function//anion binding//oxidoreductase activity, acting on the CH-NH group of donors, oxygen as acceptor//binding//organic cyclic compound binding//coenzyme binding//flavin adenine dinucleotide binding//catalytic activity//heterocyclic compound binding//oxidoreductase activity, acting on the CH-NH grou…	K13366 polyamine oxidase [EC:1.5.3.14 1.5.3.16 1.5.3.-] | (RefSeq) polyamine oxidase 1
368	PGSC0003DMG400006855	196.412	28.8785	45.3802	15.7601	51.1054	1003.68	12830.5	-3.6762	3.2395e-29	1.1089e-26	DOWN	2947.45	971.628	1.601	1.1096e-07	3.8917e-06	UP	3112.37	13506.7	-2.1176	4.843e-18	1.5409e-15	DOWN	1766.64	13507.2	-2.9346	1.022e-33	2.7583e-31	DOWN	2546.97	1635.49	0.63906	0.0038379	0.022463	FALSE	2643.43	12510.7	-2.2427	1.53e-16	4.1474e-14	DOWN	GO:0071704//GO:0022414//GO:0032501//GO:0016126//GO:0006066//GO:1901576//GO:0046165//GO:0009790//GO:0016125//GO:0032259//GO:0008152//GO:0061458//GO:1901360//GO:0010154//GO:0048856//GO:0044238//GO:0007275//GO:0044281//GO:1901362//GO:0032502//GO:0008610//GO:0009058//GO:0048316//GO:0003006//GO:0008202//GO:1901615//GO:0044283//GO:0006694//GO:1901617//GO:0048608//GO:0009793//GO:0048731//GO:0009791//GO:…	organic substance metabolic process//reproductive process//multicellular organismal process//sterol biosynthetic process//alcohol metabolic process//organic substance biosynthetic process//alcohol biosynthetic process//embryo development//sterol metabolic process//methylation//metabolic process//reproductive system development//organic cyclic compound metabolic process//fruit development//anatomi…	GO:0043227//GO:0043229//GO:0005575//GO:0043231//GO:0005911//GO:0044424//GO:0005737//GO:0044464//GO:0043226//GO:0012505//GO:0009506//GO:0005622//GO:0055044//GO:0044444//GO:0005623//GO:0030054//GO:0005783//GO:0005773	membrane-bounded organelle//intracellular organelle//cellular_component//intracellular membrane-bounded organelle//cell-cell junction//intracellular part//cytoplasm//cell part//organelle//endomembrane system//plasmodesma//intracellular//symplast//cytoplasmic part//cell//cell junction//endoplasmic reticulum//vacuole	GO:0008168//GO:0003674//GO:0016741//GO:0003838//GO:0008757//GO:0003824//GO:0008169//GO:0016740	methyltransferase activity//molecular_function//transferase activity, transferring one-carbon groups//sterol 24-C-methyltransferase activity//S-adenosylmethionine-dependent methyltransferase activity//catalytic activity//C-methyltransferase activity//transferase activity	K00559 sterol 24-C-methyltransferase [EC:2.1.1.41] | (RefSeq) cycloartenol-C-24-methyltransferase 1
[truncated: 715 more rows]
[truncated: 3 more columns]
